# Supplementary material
Source: PubMed Central journal article supplement (PMC5815012)
Supplement: jama-317-1967-s001.pdf [file jama-317-1967-s001.pdf]

# Tufts Medical Center

Protocol Title: Effect of Intra-Articular Steroids on Structural Progression of Knee OA: A Randomized Controlled Trial

Protocol Version Date: April 12, 2010 (Initial)

Principal Investigator: Timothy E. McAlindon, MD, MPH  
Chief, Division of Rheumatology  
Tufts Medical Center  
800 Washington Street, Tufts Box 406  
Boston, MA 02111

NIAMS Grant R01 AR057802-01

# TABLE of CONTENTS

|                                                                       |    |
|-----------------------------------------------------------------------|----|
| 1. Summary .....                                                      | 4  |
| 2. Background and Significance .....                                  | 4  |
| 3. Study Objectives .....                                             | 12 |
| 4. Investigation Sites .....                                          | 13 |
| 5. Duration of Study .....                                            | 13 |
| 6. Study Population .....                                             | 13 |
| 6.1 Number of Study Participants .....                                | 13 |
| 6.2 Primary Diagnosis .....                                           | 13 |
| 6.3 Inclusion Criteria .....                                          | 13 |
| 6.4 Exclusion Criteria .....                                          | 13 |
| 6.5 Selection of Study Knee in the event that both are eligible ..... | 14 |
| 7. Investigational Product .....                                      | 14 |
| 7.1 Investigational Product .....                                     | 14 |
| 7.2 Placebo Product .....                                             | 14 |
| 7.3 Investigational Product and Placebo Storage .....                 | 14 |
| 7.4 Investigational Product and Placebo Preparation .....             | 15 |
| 7.5 Dosage and Administration .....                                   | 15 |
| 7.6 Duration of Treatment .....                                       | 15 |
| 7.7 Warnings and Precautions .....                                    | 15 |
| 7.7.1 Triamcinolone .....                                             | 15 |
| 7.7.2 0.9% Sodium Chloride (placebo) .....                            | 15 |
| 8. Procedures and Monitoring .....                                    | 16 |
| 8.1 Randomization .....                                               | 16 |
| 8.2 GCP and Monitoring .....                                          | 16 |
| 8.3 Electronic Data Capture .....                                     | 16 |
| 8.3.1 Security of the electronic data .....                           | 16 |
| 8.3.2 HIPAA .....                                                     | 17 |
| 8.4 Consents .....                                                    | 17 |
| 8.4.1 Informed .....                                                  | 17 |
| 8.4.2 Research Authorization Form .....                               | 17 |
| 8.4.3 E-Mail .....                                                    | 18 |
| 8.4.4 Photography/Video-Recording .....                               | 18 |
| 8.5 Observations and Measurements .....                               | 18 |
| 8.5.1 Study Visits .....                                              | 18 |
| 8.5.2 Laboratory .....                                                | 22 |
| 8.5.3 Radiology .....                                                 | 23 |
| 8.5.4 Knee MRI .....                                                  | 23 |
| 8.5.5 Knee ultrasonography .....                                      | 23 |
| 8.5.6 DXA (Bone density testing) .....                                | 23 |
| 8.5.7 Observed Gait Analysis .....                                    | 23 |
| 8.6 Participant Compliance .....                                      | 24 |
| 8.6.1 Investigational Product .....                                   | 24 |
| 8.6.2 Study Visits .....                                              | 24 |
| 8.7 Concomitant Medications .....                                     | 24 |
| 8.8 Adverse Experiences/Events (AE) .....                             | 25 |
| 8.8.1 AE Definitions .....                                            | 25 |
| 8.8.2 AE Reporting .....                                              | 25 |
| 8.8.3 Serious Adverse Event (SAE) Reporting .....                     | 25 |
| 8.8.4 AE / SAE Monitoring .....                                       | 25 |
| 8.9 Early Withdrawal/Termination of Participants .....                | 26 |
| 9. Computational Analyses .....                                       | 26 |
| 10. Adaptive Interim Monitoring .....                                 | 26 |
| 11. Investigator's Regulatory Obligations .....                       | 28 |
| 11.1 Institutional Review Board .....                                 | 28 |
| 11.2 Tufts Medical Center Rheumatology Outpatient Clinic .....        | 28 |
| 11.3 Data Safety Monitoring Board .....                               | 28 |

|                                                                           |    |
|---------------------------------------------------------------------------|----|
| 11.4 Records/Data Retention.....                                          | 28 |
| References.....                                                           | 29 |
| Appendix A.....                                                           | 42 |
| Study Timeline.....                                                       | 43 |
| Appendix B.....                                                           | 43 |
| Schedule Of Visits And Examinations.....                                  | 44 |
| Appendix C.....                                                           | 44 |
| ACR Criteria for Classification of Idiopathic Knee Osteoarthritis.....    | 44 |
| Appendix D.....                                                           | 45 |
| Kellgren and Lawrence Radiographic Grading System for Osteoarthritis..... | 45 |
| Appendix E.....                                                           | 46 |
| WOMAC Questionnaire.....                                                  | 46 |
| SF-36v2™.....                                                             | 46 |
| Sanford Health Assessment Questionnaire.....                              | 46 |
| Global Knee Pain Severity Scale.....                                      | 46 |
| Appendix F.....                                                           | 47 |
| Tufts Medical Center MRI Screening Form.....                              | 48 |
| Appendix G.....                                                           | 49 |
| Laboratory Testing.....                                                   | 49 |

## 1. Summary

Triamcinolone 40 mg will be compared to placebo in a randomized placebo-controlled clinical trial testing the effect of triamcinolone versus placebo given intra-articularly (into the index knee joint with osteoarthritis (OA)) once every three months over two years for a total of eight knee injections. Tolerability and safety will be assessed by adverse effects (AE) reporting, physical examination, vital signs, and clinical laboratory tests. The primary clinical outcome will be assessed by changes in the WOMAC questionnaire. The primary pathological process measure will be change in knee cartilage volume as measured by magnetic resonance imaging (MRI).

## 2. Background and Significance

### 2.1 Osteoarthritis Background

Symptomatic knee OA has an estimated overall incidence of 240/100,000 person years<sup>38</sup>, and is the most frequent cause of dependency in lower limb tasks, especially in the elderly<sup>39</sup>. It causes 68 million work loss days per year and more than 5% of the annual retirement rate<sup>11, 12</sup>. It has considerable economic and societal costs, in terms of work loss<sup>40</sup> and hospital admission<sup>41</sup>. Furthermore, OA is the most frequent reason for joint replacement at a cost to the community of billions of dollars per year<sup>12</sup>. There are currently no therapies for OA confirmed to have an effect on disease progression. Treatments commonly used for OA include intra-articular corticosteroids (IACS), a widely employed invasive intervention that is of particular note because its structural effects on cartilage and bone are uncertain.

### 2.2 Knee Osteoarthritis and Knee Synovitis

OA is characterized by focal and progressive damage to articular hyaline cartilage accompanied by a hypertrophic 'reaction' in peri-articular bone<sup>42</sup>. The prevailing view of knee OA has been one of a non-inflammatory disorder but chronic inflammatory changes in the synovium are seen in all stages of knee OA<sup>43-47</sup>, appear to be of clinical significance<sup>17, 19, 48, 49</sup>, are associated with regions of cartilage damage<sup>19, 50</sup> and predict structural progression<sup>19</sup>. Inflamed synovium is also the most plausible target for IACS in knee OA<sup>19</sup>.

It is likely that synovial inflammation in osteoarthritic knees is triggered and sustained by particles and crystals abraded from damaged cartilage – a "detritic synovitis"<sup>18</sup>. These generate in synovial macrophages and fibroblasts a broad range of inflammatory responses that resemble those found in inflammatory joint disorders such as rheumatoid arthritis. According to this model, synovial inflammation should likely occur as a late consequence of damage to cartilage and subchondral bone. However, it is also possible that it occurs earlier, as a paracrine response to disordered homeostasis in the articular environment<sup>18</sup>.

Synovial biopsy studies of osteoarthritic knees have found a high prevalence of inflammation. One study of 63 patients with moderate to severe knee OA found thickening of the lining layer, increased vascularity, and inflammatory cell infiltration in synovial membranes in all knees, with the most prominent features in those with advanced disease<sup>44</sup>. However, synovitis appears common even in mild knee OA - Myers studied the mild end of the spectrum and found synovitis in 55% of biopsied knees<sup>43</sup>. Another biopsy study of nine selected knees with mild OA and short symptom duration also showed a mild chronic synovitis in all cases<sup>47</sup>.

Synovial changes in the knee also appear to be associated with pain and structural damage. An MRI study of over 400 individuals from both Veterans Affairs and community sources, found more effusions and synovial thickening among those with knee pain<sup>49</sup>. Among the subset with symptomatic radiographic knee OA, synovial thickening was associated with the severity of knee pain. In a subsequent longitudinal

analysis of 270 participants in that study who had MRI evaluations at 15 and 30 months, change in synovitis (especially in the infrapatellar fat pad) correlated with the change in pain ( $r = 0.21$ ,  $p = 0.0003$ )<sup>17</sup>. Loeille et al, in scrutinizing the relationships between synovitis and cartilage damage among 39 patients with knee OA using arthroscopy, biopsy and MRI, found a correlation of synovitis with medial tibiofemoral cartilage damage ( $r = 0.5$ ,  $p=0.001$ )<sup>60</sup>.

There is also evidence that synovitis participates in the structural progression of knee OA<sup>19, 51</sup>. Ayral studied a cohort of 422 individuals with medial compartment tibiofemoral OA who participated in a (null) clinical trial that included a systematic assessment of synovitis and chondropathy using arthroscopy<sup>19</sup>. Twenty-one percent of participants had inflammatory changes in the synovium at baseline and these individuals were three times more likely to exhibit progression of cartilage damage (25.8% vs. 11.9%; adjusted odds ratio = 3.11, 95% confidence limits 1.07 - 5.69). Pelletier et al, in a 2-month observational study of 29 knee OA patients with MRI-confirmed synovitis found that the baseline synovitis score correlated significantly with the percentage loss in cartilage volume over this relatively short period ( $r \sim 0.6$ )<sup>51</sup>.

### **2.3 Mechanisms of Joint Damage from Synovitis in Knee Osteoarthritis**

The synovium has important roles in articular health, so it is logical to infer that pathological changes and functional compromise may contribute to progression of OA. Two important synovial roles in articular homeostasis include provision of vascular support to distant chondrocytes and facilitation of low-friction movement between cartilaginous surfaces<sup>52</sup>. The synovium produces two critical components of synovial lubrication; (i) the macromolecule hyaluronan, which confers to synovial fluid its viscosity and (ii) the boundary layer lubricant lubricin. In situations of joint injury, the synovium increases its secretion of hyaluronan, which may dampen inflammation in the synovial space. Typical OA effusions are transudative and have high viscosity<sup>52</sup>. However, this viscosity is lost in the presence of inflammation<sup>53</sup>. Experimental data also show reduction in synovial secretion of lubricin in the presence of inflammation and proinflammatory cytokines such as IL-1 and TNF- $\alpha$ <sup>54, 55</sup>.

The synovium may also participate in the pathophysiology of OA through the secretion of proteolytic enzymes and cytokines. Indeed, cytokines are fairly abundant in OA synovium, at least in late-stage disease (Table 1)<sup>18</sup>. Immunohistological studies of synovium obtained from OA and rheumatoid (RA) joints show quantitative rather than qualitative differences between the two disorders<sup>44</sup>. Production of IL-1 $\alpha$ , IL-1 $\beta$ , and TNF $\alpha$  is present in synovial membranes from all patients with OA, irrespective of the degree of articular cartilage damage<sup>44</sup>. Thus, chronic inflammatory changes with production of proinflammatory cytokines are a feature of synovial membranes from patients with early OA, with the most severe changes resembling those of RA.

IL-1 and TNF- $\alpha$  are the dominant cytokines in inflamed OA joints, of which IL-1 appears to have the greatest potential to mediate cartilage damage<sup>56, 57</sup>. IL-1 is produced in considerable quantities in OA synovium<sup>58, 59</sup> and appears to be the driving force in the production of destructive enzymes (matrix metalloproteinases) and IL-6<sup>60</sup>. However, there are numerous other cytokines that may have specific and important roles in OA. IL-6, for example, may upregulate matrix metalloproteinase expression in cartilage, stimulate hepatic production of acute phase proteins and mediate bone destruction<sup>18</sup>. The non-peptide mediator, Nitric oxide (NO), is also produced by synovial cells and chondrocytes in OA joints<sup>61</sup> and may contribute cartilage destruction.

There is evidence that IL-1 and TNF- $\alpha$  may be partly responsible for increased amounts of proteases found in OA synovium<sup>18</sup>. Coordinate synthesis of IL-1 and stromelysin has been found in canine OA<sup>62</sup>, as has a correlation in human OA synovium between the number of inflammatory cells and levels of neutral proteases<sup>63</sup>. Expression of collagenase and stromelysin is evident in OA synovium, albeit at lower levels than in rheumatoid disease<sup>64, 65</sup>. Tissue inhibitor of metalloproteinase (TIMP) is elevated in OA synovium, with a protease:inhibitor ratio that suggests a role for proteases in tissue destruction. Indeed, many cartilage proteinases have now been identified, among which collagenase 3 (MMP-13) and

aggrecanase-1 (ADAMTS4) appear to play major roles in degradation of human cartilage matrix.<sup>52</sup> Activation of collagenase 3 (MMP-13) appears to be at least partly cytokine dependent<sup>66, 67</sup>, but there is a lack of agreement on the effect of cytokines on ADAMTS4<sup>62</sup>.

Of course, the factors that are pivotal to maintaining this balance or the cartilage response are largely unknown. It follows, then, that perturbation of the system using pharmaceuticals may have effects on the balance between catabolism and anabolism that are not entirely predictable. It is suggested, for example, that intra-articular corticosteroids (IACS) might benefit OA knees by suppressing IL-1 mediated stimulation of metalloproteinase synthesis<sup>68</sup>. While this seems plausible, the net effects of IACS on measures of cartilage health need to be tested in a clinical environment.

#### **2.4 IACS: Current Clinical Usage in the Treatment of Knee Osteoarthritis**

IACS are widely employed in the management of knee OA. It is estimated that 95% of rheumatologists in the U.S. perform IACS for OA, 53% frequently<sup>69</sup>. The use of IACS for OA is endorsed by the American College of Rheumatology (ACR)<sup>15</sup>, the European League Against Rheumatism (EULAR)<sup>16</sup>, the Osteoarthritis Research Society International (OARSI)<sup>13, 14</sup>, and the National Collaborating Centre for Chronic Conditions<sup>70</sup>. The latter was a thoughtful document and commented "...intra-articular corticosteroid injections provide short-term reduction in osteoarthritis pain... The risks ... are generally small. The question of steroid-arthropathy, ... remains controversial and is currently based on animal model and retrospective human studies".

#### **2.5 Effectiveness of IACS for Knee Osteoarthritis Pain**

There have been at least 12 randomized controlled trials (RCTs) testing IACS for OA *pain*<sup>1, 71-82</sup>, and two recent meta-analyses<sup>26, 83</sup>. The most recent and comprehensive meta-analysis<sup>28</sup> was based on 28 short-duration trials (except one<sup>1</sup>). In the pooled analyses, IACS was more effective than placebo for pain reduction one-week post injection (relative risk 1.4; 95% confidence limits 1.1 - 1.8), 2 weeks (1.8; 1.1 - 3.0) and 3 weeks (3.1, 1.6 - 6.1). They recommended that future trials have standardized outcomes, run longer, investigate different patient subgroups, and clinical predictors of response, specifically those associated with inflammation and structural damage. The proposed study will accommodate these recommendations by testing a long-term (2-year) IACS intervention among the subset of KOA with inflammatory features, using standardized clinical and structural outcomes.

#### **2.6 Previous Studies Attempting to Evaluate the Effect of IACS in Clinical Samples**

Three studies have attempted to examine the structural effects of IACS on OA progression<sup>1, 84, 85</sup>. The first was an observational report of 61 patients with knee OA who had documentation of IACS treatment over a 10-year period<sup>85</sup>. In men only, the knees that had received IACS had more severe osteoarthritis at follow-up, as measured by the tibiofemoral angle of alignment. However, this study has serious methodologic problems including bidirectional censorship and confounding by indication.

The second was an observational study of 67 patients with temporomandibular joint OA that had not responded to non-surgical treatment<sup>84</sup>. Twenty-three proceeded immediately to high condylectomy, while the remaining 44 received two intra-articular injections of triamcinolone acetonide, 20 mgs, with a 2-month interval. It is not clear how this treatment assignment was made. Eighteen of the 44 patients who received IACS later underwent high condylectomy due to 'treatment failure'. Histological examination of the surgical specimens from this subset exhibited more extensive joint damage than those in the non-steroid group. However, the observational non-randomized nature of this study introduces complexities that prevent causal inference.

Raynauld evaluated the safety of triamcinolone acetonide 40mgs, or saline control, administered every 3 months for 2 years in a randomized controlled trial for knee OA<sup>1</sup>. Structural progression was assessed using fluoroscopically-positioned knee x-rays<sup>86, 87</sup>. They enrolled 68 participants, of whom 66 completed the trial. Most had mild OA (~65% had Kellgren & Lawrence grade 2 changes). There was no difference between groups in extent of change in radiographic joint space width. The clinical outcomes were also

identical, with the exception of area-under-the-curve (AUC) analyses for night pain and stiffness that favored treated knees (AUC for night pain; treated =-0.7; untreated =-0.3;  $p = 0.005$ ; stiffness; treated =-0.7; untreated =-0.3;  $p = 0.05$ ). This study is somewhat reassuring in that it provides evidence for symptomatic benefit without evidence of increased structural deterioration. On the other hand, there are methodologic factors that limit its interpretation. The participants had mild disease and exhibited little structural progression. In fact, there was no attempt to enroll a phenotype at higher risk for progression nor was there evaluation or stratification for indicators of inflammatory OA that might predicate responsiveness to IACS. Thus, the findings are not especially informative in respect of the potential for structural modification in the pertinent phenotypes. The radiograph is also fundamentally flawed due to its inability to image soft-tissue articular structures such as cartilage, and high precision error relative to expected change, especially in a small sample such as this<sup>88</sup>.

## 2.7 Are Intra-Articular Corticosteroids Safe?

Joint sepsis is a primary concern in relation to intra-articular injection. However, while its incidence is difficult to measure with certainty, it is clearly infrequent. A 1999 estimate from a retrospective survey in France suggests an incidence rate of 13 per million injections, lower with pre-packaged syringes<sup>89</sup>. Concordant with this low estimate, a survey of all cases of septic arthritis incident between 1982 to 1991 in Nottingham, UK (which had a base population of 600,000) identified only 3 cases attributable to IACS<sup>90</sup>.

More frequent, but of less medical concern, are local aseptic inflammatory reactions to IACS injections<sup>91</sup>. These have been reported with rates up to 24% in some series<sup>73-75, 92</sup>. The biologic basis for these reactions is uncertain but may relate to the crystalline nature of the injected corticosteroid formulations.

There is systemic absorption of steroid injected into a joint. Peak plasma levels after an intra-articular injection of 80 mgs methyl prednisolone are in the order of 169 ng/ml, achieved 8 hours post injection<sup>93</sup>. A measurable transient effect on the pituitary axis is apparent with injections of 40 mg of methyl prednisolone<sup>94</sup> or >40 mg triamcinolone diacetate<sup>95</sup>. However, it seems unlikely that this has any longterm effects at the frequency generally recommended in rheumatology practice (< 3 months). Problems with the pituitary axis were also apparently not encountered in an RCT in which IACS were administered every 3 months over a 24 month period<sup>1</sup>. While links have been made between IACS and various systemic features (immunosuppression<sup>96</sup>, impaired diabetes control<sup>97, 98</sup>, flushing, menstrual irregularities<sup>99</sup>) substantial data quantifying their frequency is generally lacking<sup>83, 100</sup>. One study provided data showing elevation in blood pressure and blood glucose levels following epidural corticosteroid injections, but the doses used were greater than those proposed in this study<sup>97</sup>. Anaphylaxis after IACS has been rarely reported<sup>101, 102</sup>, as has steroid psychosis<sup>103</sup>.

The most systematic evaluation of adverse effects from IACS was performed by Bellamy, in a Cochrane review of their efficacy for OA<sup>26</sup>. He found that side effects were uncommon and noted no reports of *serious* adverse events among the trials reviewed. Reported adverse events included post-injection flare, crystal-induced synovitis, tissue atrophy, fat necrosis, calcification, joint sepsis, steroid arthropathy, avascular necrosis, hematoma, fluid retention, hyperglycemia and hypertension.

Raynauld's RCT of IACS is pertinent to this proposal in that it employed a similar intervention dosage and time frame<sup>1</sup>. In that study, "No infections (local or systemic) or acute flares were associated with the injections during the study. Findings of laboratory tests performed during the study were within normal limits, and there were no differences between the treatment groups."

## 2.8 Effects of Intra-Articular Corticosteroids on Cartilage – Helpful or Adverse?

A number of case studies emerged in the 1950s and 1960s that suggested a link between IACS injections and joint destruction (cited by Salter<sup>104</sup>, Mankin<sup>105</sup>). Chandler and Wright, for example, observed that repeated intra-articular injection of hydrocortisone in patients with rheumatoid arthritis seemed to improve the extent of synovitis but increase the rate of radiological deterioration<sup>106</sup>. Chandler

et al subsequently drew an analogy with a Charcot joint in a description of apparent acceleration of progression of hip OA in a doctor's wife who had received frequent IACS injections<sup>107</sup>. Similar inferences based on clinical observations recur even in recent literature<sup>85</sup>. While such inferences are innately confounded by indication, their validity seemed to be substantiated by early studies in animals that showed anti-anabolic effects of IACS on cartilage<sup>105, 108, 109</sup>.

## 2.9 Effects of Corticosteroids on Healthy Cartilage In-Vitro

There is evidence that corticosteroids have anti-anabolic influences on cartilage metabolism in-vitro<sup>110-112</sup>. Farquhar tested for interactions between corticosteroid exposure and joint loading on cartilage metabolism and observed that high dose steroids depressed protein and proteoglycan synthesis<sup>110</sup>. Heavy loading further exacerbated the loss of matrix solids. Murphy et al, in pursuit of the optimal therapeutic concentration of IACS, found that proteoglycan synthesis in normal cultured equine articular cartilage was severely depressed by the presence of methylprednisolone 10 mg/mL, and failed to recover after 13 days of culture without methylprednisolone<sup>112</sup>. Cartilage treated with concentrations in the range of 5 mg/mL also exhibited adverse metabolic responses, but these tended to recover after methylprednisolone removal. Lower concentrations did not have significant effects. More recently, Fubini scrutinized corticosteroid-induced changes in collagen expression at transcriptional and translational levels in articular cartilage from young adult horses<sup>111</sup>. Steady-state levels of type II procollagen mRNA decreased as methylprednisolone concentrations increased in a dose-dependent fashion, dropping below 10% of control values by a concentration of  $1 \times 10^5$  pg/ml. Cytotoxicity occurred as methylprednisolone levels were increased beyond  $1 \times 10^9$  pg/ml. Based on a comparison of their data with information on the pharmacokinetics of intra-articular methylprednisolone in clinical practice, they estimated that synovial fluid methylprednisolone may remain above a cytotoxic concentration for more than 36 hours following a typical clinical IACS injection. Pelletier et al found that hydrocortisone reduced proteoglycan catabolism in cartilage explants (which they attributed to suppression of metalloprotease synthesis) but also proteoglycan synthesis. They observed extensive vesicular dilatation of chondrocyte endoplasmic reticulum in explants treated with hydrocortisone<sup>113</sup>.

## 2.10 Effects of Corticosteroids on Healthy Cartilage in Animal Models

In-vivo studies of the effects of corticosteroids on healthy cartilage tend to show adverse effects, although their findings are not always consistent. Moskowitz in 1970, and Behrens in 1975, separately observed deleterious effects of intra-articular triamcinolone acetonide on rabbit cartilage<sup>27, 28</sup>. These included nuclear degeneration, cyst formation, cartilage fissures, and reduced synthesis of proteoglycans and matrix proteins. Lewandowski induced 'OA-like damage' in rats using repeated intramuscular injections of dexamethasone<sup>114</sup>. Catabolic or anti-anabolic effects of IACS have also been seen in studies of horses<sup>108</sup> and rabbits<sup>115</sup>. One study testing interactions of intra-articular hydrocortisone and running on cartilage in rats found that the combination was more detrimental than either intervention alone<sup>116</sup>. Studies testing cartilage effects of intra-articular methylprednisolone acetate on the healing of osteochondral defects in horse joints had somewhat discordant results. Shoemaker found degenerative effects<sup>117</sup> but Foland did not observe significant changes<sup>118</sup>. Of course, the extent to which effects in animal models can be generalized to human situation is uncertain.

## 2.11 Effects of Corticosteroids on Degenerative Cartilage in Animal Models

In contrast to the prior scenarios, these studies provide evidence that IACS may reduce cartilage degradation in certain pathophysiologic situations. Williams & Brandt tested the effect of intra-articular triamcinolone hexacetonide on the development of degenerative cartilage changes that follows a single intra-articular injection of sodium iodoacetate (a metabolic poison)<sup>21</sup>. These features include cartilage fibrillation, loss of staining with Safranin O, depletion of chondrocytes, and prominent osteophytes, without evidence of synovitis. However, when triamcinolone hexacetonide was injected into the ipsilateral knee 24 hours after the intra-articular injection of iodoacetate, fibrillation was noted in only 1 of 6 samples, osteophytes were less prominent, pericellular staining with Safranin O persisted, and cell loss



was less extensive. Thus, triamcinolone hexacetonide produced a marked, dose-dependent protective effect in this model of chemically-induced articular cartilage damage.

Corticosteroids also apparently reduce progression of degenerative lesions in the cruciate ligament transection dog model of OA<sup>22, 23</sup>. Pelletier & Martel-Pelletier treated 6 animals with oral prednisone and 6 with intra-articular triamcinolone hexacetonide at surgery and 4 weeks later<sup>22</sup>. Twelve other operated dogs received no treatment. Four of 15 normal control dogs received intra-articular triamcinolone. All dogs were sacrificed 8 weeks post-surgery. Operated untreated dogs developed significant cartilage lesions on the femoral condyles and tibial plateaus with prominent osteophytes. Operated dogs treated with oral or intra-articular steroids developed significantly less osteophytosis. Cartilage erosions on femoral condyles appeared in 25% of the untreated dogs, 8% of the dogs receiving oral prednisone, and none of the dogs receiving intra-articular triamcinolone. In both groups of treated dogs, the size of the tibial plateau lesions was significantly smaller than in the operated untreated dogs. Histologically, corticosteroids also significantly reduced the severity of cartilage structural degeneration. Electron microscopy revealed no increase in cell degeneration or death associated with steroids.

The same research group later performed a similar experiment testing the effect of intra-articular methylprednisolone acetate on the development of osteoarthritic lesions in the dog model of OA<sup>23</sup>. Treatment with methylprednisolone reduced the incidence and size of osteophytes and the histologic severity of cartilage damage. Immunohistochemistry of the OA cartilage revealed a marked increase in staining for stromelysin in chondrocytes and throughout the matrix. Treatment with methylprednisolone reduced this toward normal in both chondrocytes and matrix.

In a subsequent mechanistic study using the same animal model, Pelletier et al examined the effects of triamcinolone hexacetonide on cartilage metalloproteases and expression of cytokines/oncogenes (IL-1 beta, c-Fos, and c-Myc)<sup>119</sup>. This 30-dog study had 4 groups: (1) no treatment; (2) triamcinolone at time of surgery and at 4 and 8 weeks later; (3) triamcinolone at 4 and 8 weeks after surgery; (4) triamcinolone at 8 weeks after surgery. As before, intra-articular injections of triamcinolone reduced the development of osteophytes and the histologic severity of cartilage lesions. Immunohistochemistry revealed that triamcinolone reduced the percentage of chondrocytes immunoreactive for stromelysin in a dose-response fashion. They inferred that the effect of triamcinolone may be mediated through a reduction in the expression of proteolytic enzymes, such as stromelysin.

## **2.12 Effects of Corticosteroids on Inflammatory Cartilage Damage in Animal Models**

The potential for corticosteroids to attenuate cartilage damage resulting from inflammatory milieus appears more clear-cut. Corticosteroids have diverse anti-inflammatory effects that could lead to a reduction in activity of downstream catabolic pathways<sup>120, 121</sup>. In inflammatory arthritis models, corticosteroids reduce proteoglycan breakdown, suggesting an inhibitory effect on enzymatic degradation of cartilage<sup>24, 122, 123</sup>. Sedgwick et al found evidence that suppression of synovial expression of inflammatory mediators is a critical mediator of this effect<sup>24</sup>. Using an in-vivo inflammatory model of cartilage destruction, they observed that (soluble) hydrocortisone sodium succinate reduced while (insoluble) hydrocortisone acetate enhanced proteoglycan loss<sup>24</sup>. Injection of the same dose of hydrocortisone acetate into the inflamed lining tissue reversed this effect. However, these results are also compatible with the possibility that corticosteroids formulated to provide persistent intra-articular concentrations have catabolic effects on cartilage.

Joosten et al compared rimexolone and triamcinolone hexacetonide injected into joints of mice with monoarticular antigen-induced arthritis<sup>25</sup>. In control joints, both drugs suppressed proteoglycan synthesis. However, in the inflamed joints, they counteracted the usual severe suppression of proteoglycan synthesis, and reduced the extent of osteophyte formation (a characteristic of this type of experimental arthritis). Thus, in the presence of overt inflammation, the overall effect of corticosteroids on cartilage appears to be favorable.

## 2.13 Intra-Articular Corticosteroids and Peri-Articular Bone

Peri-articular bone has an important role in protecting cartilage from injury. It is estimated that 30-50% of a load across a knee is absorbed by peri-articular bone compared to only 1-3% by articular cartilage<sup>124-127</sup>. In OA there are widespread pathologic changes in peri-articular bone that include thickening and remodeling of the subchondral plate<sup>128</sup>, increased bone turnover<sup>129</sup>, trabecular microstructural abnormalities<sup>130,131,132</sup> and macroscopic damage<sup>133</sup>. All of these impair the biomechanical properties of peri-articular bone and could contribute to structural progression. Clinical observations bear this out: peri-articular scintigraphic abnormalities and bone marrow lesions (both common in OA) predict radiographic progression<sup>134</sup> and correlate with subsequent joint space loss ( $r \sim 0.2 - 0.3$ ,  $p < 0.05$ )<sup>135,136, 137</sup> while systemic bone density and tibial peri-articular BMD are highly predictive of structural progression of knee OA<sup>138, 138, 139,140</sup>. Bruyere found a correlation between subchondral BMD and 1-year change in radiographic joint space width of 0.43, highlighting the large effect of bone health on cartilage loss<sup>140</sup>. Zhang et al, examined the relationship of femoral neck BMD with progression of radiographic knee OA among 473 women over 8 years<sup>138</sup>. Compared to those in the lowest quartile of BMD, the adjusted odds ratios for progression were 0.3, 0.2, and 0.1 among women in the 2nd, 3rd, and highest BMD quartiles ( $p$  for trend = 0.04).

Glucocorticoids have effects on bone metabolism that include suppression of osteoblast proliferation and reduced protein synthesis<sup>141</sup>. The reduction in protein synthesis by osteoblasts is probably mediated by direct glucocorticoid receptor regulation of important osteoblast genes. This results in loss of bone mass at trabecular sites and a propensity for fracture. Surprisingly, we have not found any previous studies addressing how these biological effects might interact with processes in osteoarthritic peri-articular bone. It may be reassuring that studies of IACS for knee OA, including a 2-year intervention<sup>1</sup>, make no note of any adverse effect on bone health<sup>26</sup>. Nevertheless, the biologic effects of corticosteroids on bone, together with epidemiologic observations on the relationships of bone density with progression of OA, indicate that effects of IACS on bone health need to be evaluated. This proposed study will incorporate measures of peri-articular and distant bone mineral density using DXA, and trabecular morphometry using MRI.

## 2.14 Ultrasonographic Screening for Synovitis in Osteoarthritic Knees

Clinical and radiological characteristics are poor predictors of inflammation in knee OA<sup>142</sup>. Ultrasonography and MRI both have the capability to demonstrate synovial changes<sup>34, 143, 144</sup>. Of these two modalities, ultrasonography has greater clinical utility as a screening tool because of portability, lower cost and increasing deployment in rheumatology practice. These factors make it a more desirable technology than MRI to evaluate knee OA synovitis in a clinical setting, especially since the probable outcome of the proposed trial is a therapeutic strategy (IACS) that is contingent on screening for the presence of knee joint synovitis.

In general, musculoskeletal ultrasonography has high sensitivity and specificity in the detection of joint inflammation<sup>145, 146</sup>, and is sensitive to change induced by therapeutic interventions<sup>147-149</sup>. Ultrasound may be slightly less predictive than MRI in the detection of synovial thickening<sup>150</sup>. One study compared B-mode and power Doppler ultrasound to *contrast-enhanced* MRI -effusion or synovial thickening was detected by B-mode ultrasound in 58%, power Doppler in 63% and contrast-enhanced MRI in 82%<sup>151</sup>. Using MRI as the reference standard there was a sensitivity of 72% for effusion in the superior recess and 81% for effusion in the lateral recess. There have been a couple of pathological validation studies of ultrasonographically-detected synovitis. The first showed that power Doppler sonography can reliably measure the extent of vascularity in the synovium of knee joints, with correlations between power Doppler and pathological grading of vascularity of  $\sim 0.8$ <sup>152</sup>. Another compared ultrasound assessments of synovitis (classified according to the intensity of the power Doppler signal) against histopathology in 3 OA and 7 rheumatoid knees<sup>153</sup>. The power Doppler ultrasound synovitis score correlated with synovial tissue cell infiltrate ( $r \sim 0.6$ ), synovial lining layer thickness ( $r \sim 0.6$ ), and vascularity ( $r \sim 0.6$ ).

The primary role of the ultrasonography assessment is to enrich the sample with participants who have synovitis using a technology that can be easily deployed in clinical practice, a role for which its performance characteristics are sufficient.

### **2.15 MRI Assessment of Synovitis in Osteoarthritic Knees**

There is currently no clear consensus on the optimal MRI approach for assessment of synovitis in clinical studies<sup>154-156</sup>. While non-enhanced MRI has been used in epidemiologic and clinical studies to classify synovitis in osteoarthritic knees<sup>17, 47, 49, 50, 150, 157-159</sup>, this was generally confined to measurement of signal intensity in Hoffa's fat pad. Histological validation of this approach appears to be limited to only two cases in a series of nine patients<sup>47, 50</sup>. Although the performance of this approach may be adequate for large-scale studies, it is uncertain that it is suitable for following synovitis in a clinical trial.

Other studies indicate that *gadolinium-enhanced* MRI offers greater specificity in the detection of synovitis<sup>50, 160</sup>, and there seems to be a greater enthusiasm for use of this technique<sup>154-156</sup>. However, a number of factors militate against its use in the proposed study. Firstly, intravenous gadolinium confers a risk of severe complications<sup>161</sup> that may be unacceptable in the context of a OA research study. Secondly, contrast enhancement appears to diminish sensitivity to change of cartilage volume measures<sup>162</sup>, the primary structural outcome in this study. Thirdly, the procedure carries substantial participant and staff burden and adds to the cost of the endeavor. While the opportunity will exist to score our MRIs for synovitis, especially if clarity emerges about how best to use non-enhanced images for this purpose, we will not view this as a primary measure of this covariate.

### **2.16 Appeal and Validity of MRI in the Assessment of Knee OA Structural Progression**

Radiographs have been widely used to measure the severity of knee OA but their ability to provide precise, reproducible and valid measurement of the structures of interest (cartilage, synovium, bone) is limited. MR, on the other hand can image soft-tissue structures, provide insight into the tissue characteristics, and indicate the state of subchondral trabecular bone<sup>163</sup>. Recent MRI studies of knee OA have revealed wide-ranging damage to soft-tissue structures<sup>164, 165</sup>, and have revealed pathologies such as bone marrow lesions and synovitis<sup>17</sup>. A particular appeal of MR is the inherent digital acquisition permits quantification of signal intensities from discrete structures, generation of 3D representations of individual anatomic structures, and computation of their volumes.

An OMERACT-OARSI workshop on imaging technologies published a comprehensive review of the MRI data on (1) pulse sequences for morphological analysis of articular cartilage (2) techniques for segmenting cartilage (3) semi-quantitative scoring of cartilage status and (4) technical validity, precision and sensitivity to change of quantitative measures of cartilage morphology<sup>30</sup>. Among their conclusions was that quantitative assessment of cartilage morphology using fat-suppressed gradient echo sequences and appropriate image analysis techniques, displays high accuracy and adequate precision (e.g., root-mean-square standard deviation medial tibia=61  $\mu\text{m}^3$ ) for longitudinal studies in OA patients. Longitudinal studies show changes in cartilage volume of the order of -4% to -6% occur per annum in OA in most knee compartments (e.g., -90  $\mu\text{m}^3$  in medial tibia). Annual changes in cartilage volume exceed the precision errors and appear to be associated with clinical symptoms as well as with time to knee arthroplasty.

Cartilage volume and thickness measurements have been validated in at least nine studies using cadaveric knees or patient specimens from arthroplasty<sup>166-173</sup>. Most of these document a close linear relationship between the two measures with differences in the range of 5 – 10%. MRI cartilage volume and thickness measurements obtained prior to arthroplasty have been validated against actual cartilage volume from the resected specimen<sup>174</sup>. Cartilage volume assessments were lower using MRI (range 7-27%) but there was a high correlation between the two measures ( $r=0.98$ , standard error 7%). This study provides estimates of absolute cartilage volume loss, e.g. mean medial tibia cartilage loss in patients with medial compartment OA was 1290  $\text{mm}^3$ <sup>174</sup>.

The reproducibility of cartilage volume measurements appears to be excellent<sup>30</sup>. Raynauld et al demonstrated inter-reader ICCs of 0.986-0.995 for total cartilage volume, and intra-reader ICCs of 0.99<sup>176</sup>. We have also examined the reproducibility of *longitudinal* measurement of cartilage volume loss over a 2-year period and demonstrated intra-reader ICCs of ~0.93.

MRI assessments of OA severity appear clinically relevant and have discriminative validity. Comparison of cartilage volume measured by MRI with severity of radiographic joint space narrowing showed a mean reduction in tibial cartilage volume of 1.00 ml (s.d. 0.32) in the medial compartment and 0.53 ml (s.d. 0.25) in the lateral compartment each increment in joint space narrowing score<sup>176</sup>. Estrogen-users were found to have more cartilage than non-users (adjusted difference = 0.30 ml, 95% confidence interval 0.08 - 0.52)<sup>177</sup>. MRI can detect in-vivo deformation of patellar cartilage shortly after joint loading<sup>178</sup>, diurnal variation in cartilage thickness<sup>179</sup>, and is more sensitive in assessment of OA progression than radiography and arthroscopy<sup>136</sup>. Cartilage volume loss also predicts symptoms<sup>180</sup> and arthroplasty<sup>181</sup>.

Currently there are at least thirteen publications describing the measurement characteristics of this approach among clinical cohorts with knee OA followed for periods up to three years<sup>182-191</sup>. With one exception<sup>187</sup>, these show progressive cartilage volume loss with a mean value in the tibia, or medial tibia, of ~5%, s.d. of ~5%, range between 3.8 – 7.4%. One study detected cartilage volume loss in the absence of change in joint space width, confirming that MRI has greater sensitivity to change than radiography<sup>186</sup>.

A number of semi-quantitative scoring methods for whole-organ OA and cartilage status have been developed<sup>192-196</sup>. These have shown adequate reliability, specificity and sensitivity, and ability to detect lesion progression over 1-2 years<sup>30</sup>. Intra-class correlation coefficients for components of these scales are in the range 0.59 – 0.92, with the most reliable assessments produced for osteophytosis (0.91)<sup>192, 194</sup>.

### 2.17 Peri-articular Trabecular Morphometry in Knee OA using MRI

The importance of trabecular micro-architecture as a determinant of bone strength prompted a number of investigators to develop and validate an approach to measurement of trabecular parameters using MRI<sup>163, 197-199</sup>. MRI trabecular morphometry has been validated against trabecular bone using vertebral, femoral, and calcaneal specimens as a gold standard<sup>200-202</sup>, and against bone mechanical properties<sup>202</sup>. MR trabecular parameters are reproducible<sup>163</sup>, correlate closely with those derived from optical images of the bone specimens<sup>201</sup>, and can discriminate between postmenopausal osteoporotic and non-osteoporotic women<sup>203</sup>. MRI trabecular morphometry has been evaluated in clinical studies of knee OA<sup>163</sup>, and we are currently deploying it in the Osteoarthritis Initiative (OAI)<sup>204</sup> (see Section C.6). As an indication of its *discriminative validity*, the apparent trabecular bone volume fraction and apparent trabecular spacing differs between OA and non-OA knees, varies within knees reflecting the localization of OA<sup>163</sup>, and relates to articular cartilage degeneration<sup>198</sup>, and correlates with subchondral BMD.

## 3. Study Objectives

This study is a two-year stratified and block-randomized double-blind, placebo controlled clinical trial of the effect of intra-articular triamcinolone 40 mg injectable suspension, administered every 3 months over two years (eight doses). The randomization will be stratified by the baseline radiographic severity of knee OA (Kellgren and Lawrence grade of 2 or 3). An interim analysis will be conducted after the first half of participants has completed the trial. This interim analysis will allow the trial to be stopped early for either success or futility, or allow the trial to continue if neither success nor futility has been established.

The primary structural outcome objective in this study is cartilage volume loss; secondary structural outcomes include peri-articular bone marrow lesions (BML), attrition, tibial peri-articular bone density ratio (tsBMD), and apparent bone volume fraction (aBVF). The primary clinical outcome objective is the pain domain of the WOMAC; secondary clinical outcomes include WOMAC stiffness and function scores,

physical function tests and healthcare utilization (medication use, physician visits for knee OA, and arthroplasty).

#### **4. Investigation Sites**

This study will be a single site study performed at Tufts Medical Center.

#### **5. Duration of Study**

The entire study will run over five years (a study timeline can be found in Appendix A). For each study participant participation is twenty six months. **In this study a month is defined as 28 days.**

#### **6. Study Sample**

##### **6.1 Number of Study Participants**

The number of study participants to be randomized for this study is 140. Randomized participants who withdraw study participation or who are prematurely terminated will not be replaced.

##### **6.2 Primary Diagnosis**

Study participants will have a diagnosis of knee OA as defined a) chronic knee discomfort, b) tibiofemoral or patellofemoral OA by radiograph, c) clinical exam confirming pain/discomfort referable to the knee joint.

##### **6.3 Inclusion Criteria**

- Female or Male, Age  $\geq$  45 years
- Chronic knee discomfort based on affirmative response to the question "During the past 12 months, have you had any pain, aching, or stiffness in or around your knee(s) on most days for at least one month?"
- Baseline (Month 0) Pain score  $\geq$ 2 on at least one of the WOMAC weight-bearing pain questions; and total weight-bearing pain score  $\leq$ 8
- Tibiofemoral or patellofemoral OA on posterior-anterior weight-bearing semi-flexed or lateral knee radiographs with severity equivalent to Kellgren and Lawrence grade 2 or 3
- Evidence of synovitis on ultrasound at screening
- Clinical examination confirming knee pain or discomfort referable to the knee joint
- Prepared to discontinue NSAID(s)/analgesic(s) for 2 days prior to each assessment

##### **6.4 Exclusion Criteria**

- Prior septic (study) knee joint
- Prior reconstructive surgery in the study knee
- Prior osteonecrosis (avascular necrosis of bone)
- Chronic use of oral corticosteroids; knee intra-articular corticosteroid injection within 3 months of Month 0 (baseline) visit
- Ongoing use of doxycycline, indomethacin, glucosamine and/or chondroitin; or use of these within 2 months of Screening visit
- Evidence of other inflammatory joint disease (e.g., gout, CPPD)
- Serious medical conditions or impairments that, in the view of the investigator, would obstruct their participation in the trial such as uncontrolled diabetes, uncontrolled hypertension, opiate dependency
- Plan to permanently relocate from the region, or take an extended vacation for greater than 3 months during the trial period
- Planned arthroscopy and/or arthroplasty in the study knee.

- Any contra-indication to having an MRI

## 6.5 Selection of the Study Knee In The Event That Both Are Eligible

- If both knees are eligible, then the more symptomatic knee will be selected (greater WOMAC pain subscale score)
- If both knees have equivalent WOMAC pain subscale scores, the knee with a greater K/L grade will be chosen
- Finally, if both the WOMAC pain subscales scores and K/L grades are equivalent for both knees, the study knee will be randomly assigned

## 7. Study Intervention

### 7.1 Investigational Product

Triamcinolone Acetonide (i.e., Kenalog-40mg/mL for injection)

Active Ingredient: Triamcinolone Acetonide - 40 mg/mL

Excipients: Benzyl Alcohol - 0.9%; Carboxymethylcellulose Sodium - 0.75%; Polysorbate 80 - 0.04%; may contain Sodium Hydroxide to adjust pH; may contain Hydrochloric Acid to adjust pH; Sodium Chloride

pH: 5.0-7.5

Form: Injection suspension

Manufacturer: Bristol-Myers Squibb

P.O. Box 4500

Princeton, NJ 08543-4500

Business hours: [www.bms.com](http://www.bms.com) (web site)

Business hours: phone (800) 321-1335 (drug information)

Business hours: fax (609) 897 6663

Product ID: 2150509

AAPCC Code: 132000-Corticosteroids

### 7.2 Placebo Product

0.9% Sodium Chloride Injection (sterile, nonpyrogenic, isotonic solution of sodium chloride and water for injection)

Active Ingredient: Sodium chloride 9mg/mL

Excipients: The solution may contain hydrochloric acid or sodium hydroxide for pH adjustment.

Sodium Chloride, USP is chemically designated NaCl, a white crystalline compound freely soluble in water.

How supplied: 0.9% Sodium Chloride Inj. Single-dose Flip-top Vial 10 mL that contains no bacteriostat or antimicrobial agent or added buffer. Sodium Chloride, USP is chemically designated NaCl, a white crystalline compound freely soluble in water.

mOsmol (calc): 0.308/mL

pH: 5.3 (4.5 to 7.0)

Storage requirement: 20 to 25°C (68 to 77°F). [See USP Controlled Room Temperature.

Supplier: Hospira, Inc., Lake Forest, IL 60045 USA

List Number: 4888

### 7.3 Investigational Product and Placebo Storage

Both the investigational product (IP) and placebo will be stored in the Research Pharmacy at Tufts Medical Center according to manufacturer storage instructions. Intra-articular injections of IP and placebo will be prepared by the research pharmacy and will be blinded to the research team members.

#### **7.4 Investigational Product and Placebo Preparation**

Syringes will be pre-filled by the research pharmacist with triamcinolone acetonide or saline according to the randomization code kept in the research pharmacy. The syringe contents will be masked by the research pharmacist prior to transportation using opaque labels and an opaque three-way stopcock (3). A 0.2 ml airlock will ensure that no contents are visible in the syringe tip. The needle will be affixed with the syringe in a vertical orientation so that the airlock migrates upwards to the plunger and ensures full delivery of the medication.

#### **7.5 Dosage and Administration**

Participants will receive either triamcinolone acetonide 40 mg/mL or matching 0.9% normal placebo 1mL intra-articularly (IA) to the index knee every 12 weeks for 8 doses.

IA injections will be performed by a rheumatologist with ultrasound guidance for needle placement. After introduction of the needle into the joint cavity the ultrasound machine will be switched off so that the medication flowing into the joint is not identifiable on the screen, thus maintaining the study allocation blind.

#### **7.6 Duration of Treatment**

Each randomized participant will receive a total of eight doses of intra-articular triamcinolone actinide 40 mg/mL or placebo every 12 weeks over a 2-year period (eight scheduled IA injections). In this study a month is defined as 28 days.

#### **7.7 Warnings and Precautions**

##### **7.7.1 Triamcinolone**

Joint sepsis is a primary concern in relation to intra-articular injection. However, while its incidence is difficult to measure with certainty, it is clearly very infrequent. A 1999 estimate from a retrospective survey in France suggests an incidence rate of 13 per million injections, lower with pre-packaged syringes<sup>89</sup>. Concordant with this low estimate, a survey of all cases of septic arthritis incident between 1982 to 1991 in Nottingham, UK (which had a base population of 600,000) identified only 3 cases attributable to IACS<sup>90</sup>.

More frequent, but of less medical concern, are local aseptic inflammatory reactions to IACS injections<sup>91</sup>. These self-limiting events have been reported with rates up to 24% in some series<sup>73-75, 92</sup>. The biologic basis for these reactions is uncertain but may relate to the crystalline nature of the injected corticosteroid formulations.

There is systemic absorption of steroid injected into a joint. Peak plasma levels after an intra-articular injection of 80 mgs methyl prednisolone are in the order of 169 ng/ml, achieved 8 hours post injection<sup>93</sup>. A measurable transient effect on the pituitary axis is apparent with injections of 40 mg of methyl prednisolone<sup>94</sup> or >40 mg triamcinolone diacetate<sup>95</sup>. However, it seems unlikely that this has any longterm effects at the frequency planned in this study (3 months). Problems with the pituitary axis were also apparently not encountered in an RCT in which IACS were administered every 3 months over a 24 month period<sup>1</sup>. While links have been made between IACS and various systemic features (immunosuppression<sup>96</sup>, impaired diabetes control<sup>97, 98</sup>, flushing, menstrual irregularities<sup>99</sup>) substantial data quantifying their frequency is generally lacking<sup>83, 100</sup>. One study provided data showing elevation in blood pressure and blood glucose levels following epidural corticosteroid injections, but the doses used were greater than those proposed in this study<sup>97</sup>. Anaphylaxis after IACS has been rarely reported<sup>101, 102</sup>, as has steroid psychosis<sup>103</sup>.

The most systematic evaluation of adverse effects from IACS was performed by Bellamy, in a Cochrane review of their efficacy for OA26. He found that side effects were uncommon and noted no reports of serious adverse events among the trials reviewed. Reported adverse events included post-injection flare,

~~crystal-induced synovitis, tissue atrophy, fat necrosis, calcification, joint sepsis, steroid arthropathy, avascular necrosis, hematoma, fluid retention, hyperglycemia and hypertension.~~

Pregnancy Category: Rating C (FDA) Studies in animals have revealed adverse effects on the fetus (teratogenic or embryocidal or other) and there are no well-controlled studies in women, or studies in women and animals are not available. Drugs should be given only if the potential benefit justifies the potential risk to the fetus.

Participants will be given a handout post injection of post procedure care and signs and symptoms that require medical attention.

#### *7.7.2 0.9% Sodium Chloride (placebo)*

Though reactions to a physiological fluid are not expected, adverse events could occur because of the technique of administration or contamination of the fluid. These could result in a febrile response, local tenderness, abscess, tissue necrosis, thrombosis or infection at the site of injection. Based on the data described above, the likely incidence of such events is extremely low.

Participants will be given a handout post injection of post procedure care and signs and symptoms that require medical attention.

## **8. Procedures and Monitoring**

### **8.1 Randomization**

Randomization will be stratified by baseline radiographic severity of knee OA at baseline (Kellgren and Lawrence grade of 2 or 3). Specially designed software will be used to generate the random numbers. The statistician will review lists prior to release and will keep a copy of the randomization list in a locked filing cabinet. The randomization list will be released to the research pharmacist at Tufts Medical Center who will be unblinded to participants' treatment allocation / randomization.

### **8.2 Good Clinical Practice (GCP) and Monitoring**

This study will be performed under U.S Code of Federal Regulations (CFR 21), International Committee on Harmonization (ICH) and Good Clinical Practice (GCP) guidelines. The protocol, informed consent form (ICF), and recruitment materials will be submitted to the Institutional Review Board (IRB) of the Tufts Health Sciences Campus and Tufts Medical Center for review and approval. Annual continuing review of the project will be submitted to the IRB and any other governmental agencies as required.

The Tufts Medical Center IRB will be informed of any serious adverse events (SAEs) within 5 working days of knowledge of the event.

The investigator agrees to any inspections of study-related records by the National Institutes of Health (NIH), FDA, CDER, and / or Tufts Medical Center IRB and other regulatory bodies as required.

### **8.3 Electronic Data Capture**

We will use electronic data capture (EDC) for Case Report Form (CRF) completion and some source documentation. We will use for this our secure website, which is hosted on a TMC intranet domain.

#### *8.3.1 Security of the Electronic Data*

Our web server is located within the Tufts Medical Center domain and so is inaccessible from the general internet. The TMC intranet is highly protected by its architecture, firewalls and virus software, and user



authentication protocols. Within this structure, our website will have an additional layer of user authentication using high level time-expiring passwords. We will also operate user-type permission levels to constrain access to the different functions and data (role-based security). We will encrypt in the database highly sensitive information such as passwords. As part of the institutional network protections and maintenance, our database will regular back-ups (at least daily), which will ensure that if any data can be recovered. Finally, each software component will be updated regularly by our IT group. Patches and other updates on servers are done daily to ensure that Microsoft's vulnerabilities can be identified and solved quickly.

### 8.3.2 HIPAA

In order to be compliant with Health Insurance Portability and Accountability Act (HIPAA) requirements, we will operate the following additional procedures:

1. Database normalization. Using a practice known as standard normalization of data, participant names will not be stored in the same database table as their contact information. It is through this framework that two database tables will need to be queried in order to link a participant's name with their protected health information (PHI)
2. use of encryption for sensitive information such as passwords
3. Database audit trails. Deletions and major changes made to a participants stored information will be tracked automatically
4. Any paper records that we store (e.g. consent forms) will be kept in our secure office environment protected by two levels of lockage (e.g. in a locked filing cabinet in a locked office area)

## 8.4 Consents

### 8.4.1 Informed Consent

Prior to study participation, each potential participant will be provided with an informed consent form (ICF) to read. At the first screening visit each potential participant will have a discussion about the study requirements and expectations with the principal investigator (PI) or a sub-investigator (Sub-I). If the potential participant agrees to the study requirements and expectations then the ICF will be signed and dated by both the participant and the PI or Sub-I. A copy of the signed ICF will be given to the participant and the original kept in the research files in the Division of Rheumatology.

Any amendments that warrant changes to the ICF will be submitted to the IRB for review and approval. Any new version of the ICF will be presented to the active participants at their next study visit and discussed. The participants will then decide if they want to continue their study participation. If they choose to continue to participate then the participants will sign the new ICF. A copy of the signed ICF will be given to the participant.

### 8.4.2 Research Authorization Form

To comply with the Health Insurance Portability and Accountability Act (HIPAA) of 1996 each participant will provide written permission to allow their personal/protected health information (PHI) to be disclosed within the context of this research project.

A valid Research Authorization Form (RAF) is an individual's signed permission that allows a covered entity, in this study Tufts Medical Center, to use or disclose the individual's PHI for the purposes and to the recipients stated in the RAF. When a research authorization is obtained, the Privacy Rule requires that it pertain only to a specific research study, not to future, unspecified study projects.

Once the RAF is signed, the participant will be given a copy of the signed RAF. Participants that choose not to sign a RAF will be excluded from the study.

A copy of the RAF will be submitted to and filed in the IRB.

#### ~~8.4.3 E-Mail~~

Research participants desiring to communicate with research team members during the study shall provide written consent as per Tufts Medical Center's guidelines for electronic mail communication of protected health information.

#### 8.4.4 Photography/Video-Recording

Research participants who are willing to participate in the gait analysis portion of the study will be presented with a photography/video consent form.

Participants who do not wish to sign the photography/video-recording consent form will not be excluded from participation into the study.

## 8.5 Observations and Measurements

### 8.5.1 Study Visits

All efforts will be made to keep the time of participants' study visits consistent (i.e., all a.m. or all p.m.) throughout the study to minimize intra-patient variability. Additionally, keeping a participant's study visits at approximately the same time will be important to laboratory specimen collection and MRI scanning. Laboratory collections and MRI scans done at approximately the same time for each participant will decrease biorhythm variability in the laboratory samples and MRI scans. The time of blood draw and urine collection will be noted at each visit, as well as the time of participant's last meal. Participants who will be having an MRI scan will be asked to refrain from strenuous physical activity the day before their scheduled MRI scan.

Beginning at Month 0, the study visit window will be +/- 1 week however, MRI will have up to -2 weeks prior to Month 0, 12, and 24. The visit schedule and procedures that will occur at each visit are summarized in Appendix B.

#### Month -1: Screening

This is the initial screening visit. Prior to any research procedures being done informed consent will be obtained. The remaining procedures may be done at this visit:

- ◆ Obtaining informed consent and research authorization (and other applicable consents, e.g., e-mail communication, photography/video-recording) from the potential participant
- ◆ Participant WOMAC pain subscale – Right knee
- ◆ Participant WOMAC pain subscale – Left knee
- ◆ Collection of demographic data
- ◆ Collect rheumatic history, include type, duration, and treatment history of OA as well as notation of any known complications of disease or therapies
- ◆ Medical & surgical history to include past medical history, secondary diagnoses, concomitant medications, all medications and treatments taken within the last two months
- ◆ Bilateral knee examinations
- ◆ MRI coil fit check
- ◆ Knee x-rays – bilateral, weight bearing, semi-flexed, posteroanterior (PA)
- ◆ Bilateral knee ultrasound scans
- ◆ Laboratory studies (which will be analyzed in real-time to determine eligibility)
  - Hemoglobin A1c
  - 25(OH)D
  - Rheumatoid factor, anti-CCP and hsCRP
- ◆ Provide and teach use of participant diary/calendar/journal

### Month 0 Randomization (+/- 1 week window)

This is the first visit of the double-blind treatment period. Only those participants that fulfill inclusion/exclusion criteria will be randomized. The following procedures will be done at this visit:

- ◆ Review of informed consent – study requirements and expectations
- ◆ Height/Weight
- ◆ Participant WOMAC, SF-36, HAQ, global assessment
- ◆ Randomization
- ◆ Collect and review diary/Issue new diary
  - Concomitant medications
  - Adverse experiences
  - Re-educate about diary/calendar/journal
  - Present and discuss calendar of target/ideal visit dates and times for Months 3-24 visits
- ◆ Knee examination
- ◆ Participant physical function tests (chair stand, 20 meter walk)
- ◆ Laboratory studies / collections
  - Hemoglobin A1c
  - Serum CrossLaps
  - Serum for archive
  - Plasma for archive
  - Urine CrossLaps
  - Urine for storage
  - White Blood Cell (Buffy Coat) archive
  - Synovial fluid (if obtained) for cell count, crystal exam
  - Synovial fluid (if obtained) for archive
- ◆ MRI of study knee (this exam will be done up to two weeks prior to Month 0 to review for any exclusionary criteria)
- ◆ DXA – bilateral hip, knee and lumbar spine
- ◆ Knee ultrasound exam
- ◆ Knee injection of triamcinolone or placebo by ultrasound guidance

### Month 3 (+/- 1 week window)

The following procedures will be done at this visit:

- ◆ Participant WOMAC, HAQ, global assessment
  - Collect and review diary/Issue new diary
  - Concomitant medications
  - Adverse experiences
  - Analgesia/NSAID accounting
- ◆ Laboratory studies
  - Hemoglobin A1c
  - Synovial fluid (if obtained) for cell count, crystal exam
  - Synovial fluid (if obtained) for archive
- ◆ Knee injection of triamcinolone or placebo by ultrasound guidance

### Month 6 (+/- 1 week window)

The following procedures will be done at this visit:

- ◆ Participant WOMAC, HAQ, global assessment
- ◆ Participant physical function tests (chair stand, 20 meter walk)

- ◆ Collect and review diary/Issue new diary
  - Concomitant medications
  - Adverse experiences
- ◆ Laboratory studies / collections
  - Hemoglobin A1c
  - Synovial fluid (if obtained) for cell count, crystal exam, and/or culture analysis
  - Synovial fluid (if obtained) for archive
- ◆ Knee ultrasound exam
- ◆ Knee injection of triamcinolone or placebo by ultrasound guidance

#### Month 9 (+/- 1 week window)

The following procedures will be done at this visit:

- ◆ Participant WOMAC, HAQ, global assessment
- ◆ Collect and review diary/Issue new diary
  - Concomitant medications
  - Adverse experiences
- ◆ Laboratory studies / collections
  - Hemoglobin A1c
  - Synovial fluid (if obtained) for cell count, crystal exam
  - Synovial fluid (if obtained) for archive
- ◆ Knee injection of triamcinolone or placebo by ultrasound guidance

#### Month 12 (+/- 1 week window)

The following procedures will be done at this visit:

- ◆ Height/Weight
- ◆ Participant WOMAC, SF-36, HAQ, global assessment
- ◆ Participant physical function tests (chair stand, 20 meter walk)
- ◆ Collect and review diary/Issue new diary
  - Concomitant medications
  - Adverse experiences
- ◆ Knee examination
- ◆ Laboratory studies / collections
  - Hemoglobin A1c
  - Serum CrossLaps
  - Serum for archive
  - Plasma for archive
  - Urine CrossLaps
  - Urine for storage
  - White Blood Cell (Buffy Coat) archive
  - Synovial fluid (if obtained) for cell count, crystal exam
  - Synovial fluid (if obtained) for archive
- ◆ MRI of study knee (this exam will be done up to two weeks prior to Month 12)
- ◆ DXA – bilateral hip, knee and lumbar spine
- ◆ Knee ultrasound exam
- ◆ Knee injection of triamcinolone or placebo by ultrasound guidance

#### Month 15 (+/- 1 week window)

The following procedures will be done at this visit:

- ◆ Participant WOMAC, HAQ, global assessment
- ◆ Collect and review diary/Issue new diary
  - Concomitant medications
  - Adverse experiences
- ◆ Laboratory studies / collections
  - Hemoglobin A1c
  - Synovial fluid (if obtained) for cell count, crystal exam
  - Synovial fluid (if obtained) for archive
- ◆ Knee injection of triamcinolone or placebo by ultrasound guidance

#### Month 18 (+/- 1 week window)

The following procedures will be done at this visit:

- ◆ Participant WOMAC, HAQ, global assessment
- ◆ Participant physical function tests (chair stand, 20 meter walk)
- ◆ Collect and review diary/Issue new diary
  - Concomitant medications
  - Adverse experiences
  - Analgesia/NSAID accounting
- ◆ Laboratory studies / collections
  - Hemoglobin A1c
  - Synovial fluid (if obtained) for cell count, crystal exam
  - Synovial fluid (if obtained) for archive
- ◆ Knee ultrasound exam
- ◆ Knee injection of triamcinolone or placebo by ultrasound guidance

#### Month 21 (+/- 1 week window)

The following procedures will be done at this visit:

- ◆ Participant WOMAC, HAQ, global assessment
- ◆ Collect and review diary/Issue new diary
  - Concomitant medications
  - Adverse experiences
- ◆ Laboratory studies / collections
  - Hemoglobin A1c
  - Synovial fluid (if obtained) for cell count, crystal exam
  - Synovial fluid (if obtained) for archive
- ◆ Knee injection of triamcinolone or placebo by ultrasound guidance

#### Month 24 (+/- 1 week window)

Month 24 is the final visit of the double-blind treatment period. The following procedures will be done at this visit:

- ◆ Height/Weight
- ◆ Participant WOMAC, SF-36, HAQ, global assessment
- ◆ Participant physical function tests (chair stand, 20 meter walk)
- ◆ Collect and review diary/Issue new diary
  - Concomitant medications
  - Adverse experiences

- ◆ Knee examination
- ◆ Laboratory studies / collections
  - Hemoglobin A1c
  - Serum CrossLaps
  - Serum for archive
  - Plasma for archive
  - Urine CrossLaps
  - Urine for storage
  - White Blood Cell (Buffy Coat) archive
  - Synovial fluid (if obtained) for cell count, crystal exam
  - Synovial fluid (if obtained) for archive
- ◆ MRI of study knee (this exam will be done up to two weeks prior to Month 24)
- ◆ DXA – bilateral hip, knee and lumbar spine
- ◆ Knee ultrasound exam

#### Premature Termination / Early Termination

A participant may choose to withdraw his or her study participation, or be withdrawn from the study by the investigator. The following procedures, as applicable, should be done:

- ◆ Height/Weight
- ◆ Participant WOMAC, SF-36, HAQ, global assessment
- ◆ Participant physical function tests (chair stand, 20 meter walk)
- ◆ Collect and review diary
  - Concomitant medications
  - Adverse experiences
- ◆ Knee examination
- ◆ Laboratory studies /collections
  - Hemoglobin A1c
  - Serum CrossLaps
  - Serum for archive
  - Plasma for archive
  - Urine CrossLaps
  - Urine for storage
  - White Blood Cell (Buffy Coat) archive
  - Synovial fluid (if obtained) for cell count, crystal exam
  - Synovial fluid (if obtained) for archive
- ◆ MRI of study knee
- ◆ DXA – bilateral hip, knee and lumbar spine
- ◆ Knee ultrasound exam

#### Safety Follow-Up

One month (28 days) following final study visit, certain participants will be contacted to follow-up on any adverse experiences that were noted at Month 24 (or premature termination) visit.

#### *8.5.2 Laboratory*

Tufts Medical Center will analyze blood samples for Hemoglobin A1c, Vitamin D, i.e., (25(OH)D, Rheumatoid factor, anti-CCP and hsCRP.

### 8.5.3 Radiology

Bilateral knee radiographs will be collected on all potential participants at screening. Participants will be screened for evidence of tibiofemoral OA with a Kellgren and Lawrence (K/L) score of 2 or 3, as evidenced on bilateral, PA semi-flexed, weight bearing knee x-rays. X-rays are obtained using a Synflexor Positioning Frame (Synarc, Inc. San Francisco, CA). X-rays will be evaluated for K/L score and joint space width (JSW) measurements.

### 8.5.4 Knee MRI

MRIs for this protocol will be done in the Department of Radiology (MRI suite) at Tufts Medical Center under the direction of Dr. R. Ward, utilizing a Phillips Achieva X-Series 3.0 Tesla scanner. This scanner includes the SmartKnee technology, an automated algorithm that ensures replication of the original parameters and positioning (and hence reproducibility) of repeat scans<sup>210</sup>. Participants will have three MRIs of their study knee; at Month 0, 12, and (or PT/ET if indicated).

### 8.5.5 Knee Ultrasonography

Ultrasound examination of the knee will be performed in the Rheumatology Outpatient Clinic at Tufts Medical Center under the direction of Dr. J. Yinh. Participants will have five ultrasound knee exams of their study knee; at Month -1 (screening), 6, 12, 18, and 24 study visits. All IA injections will be done under ultrasound guidance to verify needle placement in the joint space.

### 8.5.6 DXA (Bone Density Testing)

Bilateral hip, study knee and lumbar spine DXA scans will be done in the Rheumatology Outpatient Clinic at Tufts Medical Center. These measurements will be obtained using the GE Lunar Prodigy Advance machine dedicated for this study. Randomized participants will undergo three DXA studies; Month 0, 12, and 24. The weight and height measurements obtained at the time of each DXA exam.

### 8.5.7 Observed Gait Analysis

In order to obtain dynamic gait assessments, including varus thrust, we will perform observational gait analysis (OGA). We will video record the participants walking barefooted 20 meters down a corridor and turning around to walk another 20 meters back, at the participant's chosen speed.

OGA will be obtained on consenting participants at Month 0, 12, and 24 study visits. Subjects who do not want to be videotaped may opt out of this portion of the protocol. Similarly, participants who require the use of a walking aid will be excluded from this portion of the protocol while still being able to participate in the remainder of this study.

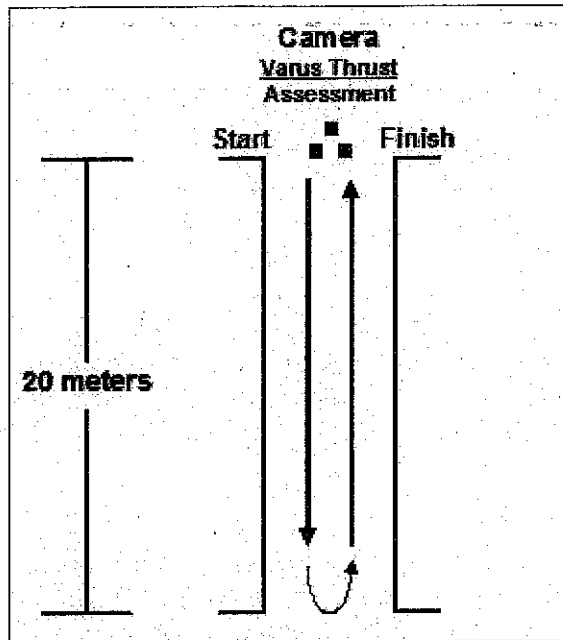

## 8.6 Participant Compliance

### 8.6.1 Investigational Product

Compliance of the IP will be ensured as the participant is either receiving the IACS or the IA placebo of Normal Saline at each study visit.

### 8.6.2 Study Visits

It is expected that randomized participants will complete all study visits. Participants missing visits will be contacted to reschedule missed appointments.

## 8.7 Concomitant Medications

The use of concomitant medications is allowed, **except** for the following:

- Other investigational drugs
- MMP-like medications (i.e., tetracyclines or related compounds e.g., Doxycycline)
- Chronic glucocorticoid use
- Glucocorticoid intra-articular injections
- Hyaluronic acid formulation intra-articular injections

At the screening visit all concomitant medications (prescription, over-the-counter, and complementary alternative medicines (CAMs)) taken within the previous 90 days will be recorded. The name, dose, frequency, and start/stop dates will be noted. Throughout the study all concomitant medications will be recorded in similar fashion.

### 8.7.1 Washout Period

Participants will be asked to discontinue use of any analgesics (NSAIDs, opioids) two full days prior to each pain assessment (including the baseline eligibility evaluation) and take only acetaminophen (up to 3 grams/day) if needed. If acetaminophen is consumed in the two days prior to the study visit, they will be asked to record this in their study calendar/journal/diary.



## 8.8 Adverse Experiences/Events (AE)

### 8.8.1 AE Definitions

Adverse Event: An adverse event is any condition that appears or worsens after the initiation of investigational agent (IACS or placebo) and described as an undesirable and unintended event, although not necessarily unexpected.

Adverse events will be classified using the National Cancer Institute's (NCI) Common Toxicity Criteria as follows:

|            |                                                            |
|------------|------------------------------------------------------------|
| Unrelated: | The AE is clearly not related to the investigational agent |
| Unlikely:  | The AE is doubtfully related to the investigational agent  |
| Possible:  | The AE may be related to the investigational agent         |
| Probable:  | The AE is likely related to the investigational agent      |
| Definite:  | The AE is clearly related to the investigational agent     |

Adverse event severity likewise will be scored according to NCI Common toxicity Criteria as follows:

|                                               |
|-----------------------------------------------|
| Grade 1 is mild                               |
| Grade 2 is moderate                           |
| Grade 3 is severe                             |
| Grade 4 is life threatening                   |
| Grade 5 is death related to the adverse event |

### 8.8.2 AE Reporting

Grade 1 and 2, non-serious, adverse events will be summarized and reported to the Data Safety Monitoring Board (DSMB) and to the Tufts Medical Center IRB annually. These events may be reported more frequently if requested by the DSMB or Tufts Medical Center IRB.

### 8.8.3 Serious Adverse Event (SAE) Reporting

Investigators are required to report serious or unexpected adverse events, which occur during the course of a human research study to the Tufts Medical Center IRB within five (5) working days of learning of the event occurrence.

A serious adverse event is defined as follows:

1. All deaths (if known), whether or not they are attributable to research participation.
2. Events of a serious nature, even if not related to the study, for example, chest pain requiring hospitalization and/or treatment, MI, stroke, major surgery, etc.
3. Events that are identified in the consent form, but that are more severe and longer lasting than expected.
4. Events that are not expected to occur during the course of the study and that are not identified in the consent form.

### 8.8.4 AE / SAE Monitoring

An independent Data Safety Monitoring Board (DSMB) will be assembled under the direction of KAI Research, Inc. (under contract with NIAMS). KAI will assemble the DSMB and the protocols for AE/SAE reporting and monitoring.

Study participants will be monitored for occurrence of adverse events. This will be done pro-actively by (i) posing structured and open-ended questions at each visit to obtain information on undesirable

experiences and (ii) by exerting surveillance of all laboratory tests. Also, a telephone number will be provided to participants to enable them to report any such experiences at any time to study personnel. In the event that an adverse experience occurs outside of office hours, participants will be provided with hospital page operator to contact the rheumatology fellow on call.

### 8.9 Early Withdrawal/Termination of Participants

Every effort will be made to keep enrolled participants in the study since it has an 'intent-to-treat' design and withdrawals / early terminations / 'drop-outs' will not be replaced.

Participants may be prematurely terminated from the study for the following reasons:

- An adverse experience with such severity that continuation in the study is unsafe
- Failure to keep study appointments
- Relocation such that the participant is not able to travel to Tufts Medical Center
- Participant personal reasons
- Lost to follow-up after all reasonable attempts to locate the participant for early termination visit
- Joint replacement surgery, osteotomy, arthroscopy, arthrocentesis or other invasive procedure on the study knee

## 9. Computational Analyses

*Hypotheses 1a,b:* Knees with OA and synovitis treated with IACS for 2 years will exhibit (a) slower rates of cartilage volume loss (our primary *structural* outcome) (b) less progression in bone marrow lesions and subchondral bone attrition.

*Hypotheses 2a,b:* The treated knees will exhibit less change in (a) tibial subchondral bone mineral density and (b) apparent bone volume fraction.

*Hypotheses 3a,b,c:* The group assigned to IACS will have less (a) overall pain (our primary *clinical* outcome), (b) decline in physical function and (c) healthcare utilization

We will perform descriptive analyses of baseline characteristics of the treated and placebo groups to permit assessment of generalizability and success of randomization. We will use either Student t-tests or rank-based nonparametric tests whenever appropriate. Our primary analytic approach will be to use intention- to-treat (ITT) analyses with mixed effects regression models for the longitudinal repeated measures data. We will also evaluate the dropout and adherence patterns of trial subjects to see if these issues may change the assessment of treatment effect.

Our analyses will evaluate the cartilage volumes and WOMAC pain scores over time using mixed effects regression models

(incorporating both fixed and random effects) for longitudinal repeated measures to see if there is a difference in the trajectory of the structural and clinical outcome measures over time between the treatment groups<sup>249</sup>. The two co-primary endpoints are (i) cartilage loss (structural)

| Table 4. Conceptualization of the study measures |                                 |                         |                            |
|--------------------------------------------------|---------------------------------|-------------------------|----------------------------|
|                                                  | <i>Structural outcome</i>       | <i>Clinical outcome</i> | <i>Covariate</i>           |
| <b>Primary</b>                                   | cartilage volume                | WOMAC pain              | knee alignment             |
| <b>Secondary</b>                                 | BML Score                       | WOMAC function          | femoral neck BMD           |
|                                                  | subchondral attrition           | Physical function       | serum 25(OH)D              |
|                                                  | tibial medial:lateral BMD ratio | healthcare utilization  | (synovitis; US and/or MRI) |
|                                                  | tibial subchondral aBVF         |                         |                            |
|                                                  | tibial BMD                      |                         |                            |
|                                                  | femoral neck BMD                |                         |                            |

and WOMAC pain (clinical). The models will include a random intercept for each subject, 3 dummy variables corresponding to the 4 randomization strata (gender and radiographic severity of KOA at entry to the trial (Kellgren and Lawrence grades 2 vs. 3)), use of analgesia (acetaminophen) at the times of outcome measurement, a time effect, an effect of treatment, and the interaction between time and treatment that will provide the basis for testing hypothesis 1 (i.e. testing if the trajectories are different between treatment groups). The effect of time will be assumed to be linear in this model unless preliminary data analysis suggests that the cartilage volumes or WOMAC score have a distinctly non-linear trend over time. The compound symmetry variance structure will be assumed for the correlation between repeated measures over time within a subject. If the likelihood cannot be maximized for this model, then the covariance structure will be simplified by removing the random intercept. In secondary analyses we will evaluate whether the clinical conclusions drawn from this trial are sensitive to the choice of different modeling methods.

For secondary analyses, we will employ the Student-t test and the rank-based Wilcoxon test to evaluate the difference between treatment groups in the change in WOMAC scores or cartilage volume, as that is how these outcomes have often been analyzed. The LOCF approach will be used to address dropout from the trial in these analyses of change over the duration of the trial. Additional secondary analyses will use alternative regression modeling approaches, including ordinal logistic regression<sup>250</sup>, and regression tree models<sup>251</sup>.

The influence of exposures that might exert intermediary or confounding effects on the outcomes (e.g. knee OA severity, serum 25(OH)D, radiographic knee alignment, use of analgesia, and BMI) will be tested by performing stratified analyses and by entering them as covariates in the linear regression models (Table 4). The ways in which all these variables might interact are complex so we will interpret our results in respect of differentiating confounding from an intermediary role on the basis of biologically based a priori hypotheses.

## 10. Adaptive Interim Monitoring

For interim monitoring, we will use the adaptive approach due to Bauer and Köhne<sup>6</sup>. This approach to interim monitoring is based on the use of Fisher's method of combining p-values from separate experiments<sup>252</sup> rather than repeated analyses of accruing data, such as the Peto method. Fisher's method rejects a common null hypothesis based on two independent experiments with significance of 0.05 if  $p_1 * p_2 \leq 0.0087$ , where this cutoff is based on the chi-square distribution with 4 degrees of freedom. In this case, the  $p_1$  would be the p-value for the null hypothesis of no treatment effect in the first half of the subjects, and  $p_2$  would be the same for the second half of the trial subjects. Using this relationship, Bauer and Köhne develop cutoffs for  $p_1$  would that would allow early stopping while maintaining a significance level of 0.05 for the product of the p-values. Using the values from their Table 1 we will stop the trial for success if  $p_1 \leq 0.0233$ . The trial would be stopped for futility if  $p_1 > 0.5$ . If  $p_1$  satisfies neither of these conditions, then the trial would continue, and the second half of the subjects would be analyzed separately at the end of the trial for  $p_2$ ; then the product of  $p_1$  and  $p_2$  would be compared to 0.0087. This adaptive method for interim monitoring allows us to use the mixed effects analysis as outlined in section E.15 for the primary outcome of cartilage volume; this will be performed on the first half of the trial subjects at the interim analysis, and, if the trial continues, separately on the second half of the subjects at the trial's end.

Bauer and Köhne note that the power loss due to the adaptive interim analysis is quite small when compared to the best single test on the complete data when the sub-samples are the same size, and when stopping for futility is only done when  $p_1$  is at least as large as 0.5. In this setting they found 77.8% power for trials where a single complete analysis would have 80% power. In our simulations presented in section E.17 of the grant proposal, we found a slightly larger, but manageable, loss of power due to the adaptive interim analysis. The gain from this interim analysis is from the possibility of early stopping

of the trial, which would significantly reduce the number of MRIs that need to be acquired and read in the second half of the subjects, and the truncation of their treatment and follow-up. It would also allow early closing of the study and earlier dissemination of study results. In 60-70% of the simulations presented in section D.17, the studies would have been stopped early.

The interim analysis of cartilage volume (pain will not be evaluated in the interim analysis) will be conducted by the study statistician and presented to the DSMB for the trial. The DSMB will evaluate these results in light of the stopping rules above and advise whether the trial should continue or stop.

## **11. Investigator's Regulatory Obligations**

### *11.1 Institutional Review Board*

The study protocol, participant informed consent form, and any recruitment materials will be reviewed and approved by the Tufts Medical Center IRB prior to the start of participant recruitment.

### *11.2 Tufts Medical Center Rheumatology Outpatient Clinic*

The study will occur at the Tufts Medical Center's Adult Rheumatology Outpatient Clinic.

### *11.3 Data and Safety Monitoring Board (DSMB)*

NIAMS has developed guidelines for data safety monitoring board activities for NIAMS funded studies and has appointed KAI to assemble and administer a DSMB for this trial. Tufts Medical Center Division of Rheumatology will work with NIAMS and KAI Research, Inc in the formation of and procedures for data and safety monitoring.

DSMB meeting minutes will be copied and forwarded to the Tufts Medical Center IRB.

### *11.4 Records/Data Retention*

Research records and data will be kept for a minimum of 2 years after study completion.

## 12. References

1. Raynauld JP, Buckland-Wright C, Ward R, et al. Safety and efficacy of long-term intraarticular steroid injections in osteoarthritis of the knee: a randomized, double-blind, placebo-controlled trial. *Arthritis Rheum* 2003;48:370-7.
2. Centeno LM, Moore ME. Preferred intraarticular corticosteroids and associated practice: a survey of members of the American College of Rheumatology. *Arthritis Care Res* 1994;7:151-5.
3. Roberts WN. Intraarticular and soft tissue injections: What agent(s) to inject and how frequently? In: Furst DE, Romain PL, eds. *UpToDate*: UpToDate Inc.; 2006.
4. Stratford PW, Kennedy DM, Woodhouse LJ, Spadoni GF. Measurement properties of the WOMAC LK 3.1 pain scale. *Osteoarthritis Cartilage* 2007;15:266-72.
5. Huskisson EC, Berry H, Gishen P, Jubb RW, Whitehead J. Effects of antiinflammatory drugs on the progression of osteoarthritis of the knee. LINK Study Group. Longitudinal Investigation of Nonsteroidal Antiinflammatory Drugs in Knee Osteoarthritis. *J Rheumatol* 1995;22:1941-6.
6. Bauer P, Kohne K. Evaluation of experiments with adaptive interim analyses. *Biometrics* 1994;50:1029-41.
7. Beunckens C, Molenberghs G, Kenward MG. Direct likelihood analysis versus simple forms of imputation for missing data in randomized clinical trials. *Clin Trials* 2005;2:379-86.
8. Lo GH, Smith MH, McAdams EL, et al. Baseline vitamin D status is predictive of longitudinal change in tibial BMD in knee OA. *Arthritis & Rheumatism* 2008;58:S239.
9. Lawrence JS, Bremner JM, Bier F. Osteo-arthrosis. Prevalence in the population and relationship between symptoms and x-ray changes. *Ann Rheum Dis* 1966;25:1-24.
10. Cooper C. Osteoarthritis: Epidemiology. In: Klippel JH, Dieppe PA, eds. *Rheumatology*. London, UK: Mosby; 1994:7.3.1-5.
11. Mankin HJ. Clinical features of osteoarthritis. In: Kelly WN, Harris EDJ, Ruddy S, Sledge CB, eds. *Textbook of Rheumatology*. 4th ed. Philadelphia, PA: W.B. Saunders Co.; 1993:1374-84.
12. The Incidence and Prevalence Database for Procedures. In: *The Incidence and Prevalence Database for Procedures*. Sunnyvale, CA: Timely Data Resources; 1995:592-6.
13. Zhang W, Moskowitz RW, Nuki G, et al. OARSI recommendations for the management of hip and knee osteoarthritis, part I: critical appraisal of existing treatment guidelines and systematic review of current research evidence. *Osteoarthritis Cartilage* 2007;15:981-1000.
14. Zhang W, Moskowitz RW, Nuki G, et al. OARSI recommendations for the management of hip and knee osteoarthritis, Part II: OARSI evidence-based, expert consensus guidelines. *Osteoarthritis Cartilage* 2008;16:137-62.
15. Hochberg MC, Altman R. D., Brandt K. D., Clark B. M., Dieppe P. A., Griffin M. R., Moskowitz R. W., Schnitzer T. J. Guidelines for the medical management of osteoarthritis. Part II. Osteoarthritis of the knee. American College of Rheumatology. *Arthritis & Rheumatism* 1995;38:1541-6.
16. Jordan KM, Arden NK, Doherty M, et al. EULAR Recommendations 2003: an evidence based approach to the management of knee osteoarthritis: Report of a Task Force of the Standing Committee for International Clinical Studies Including Therapeutic Trials (ESCISIT). *Ann Rheum Dis* 2003;62:1145-55.
17. Hill CL, Hunter DJ, Niu J, et al. Synovitis detected on magnetic resonance imaging and its relation to pain and cartilage loss in knee osteoarthritis. *Ann Rheum Dis* 2007;66:1599-603.
18. van den Berg WB, van der Kraan PM, van Beuningen HM. Synovial mediators of cartilage damage and repair in osteoarthritis. In: Brandt KD, Doherty M, Lohmander LS, eds. *Osteoarthritis*. Second ed. Oxford: Oxford University Press; 2003:147-55.
19. Ayral X, Pickering EH, Woodworth TG, Mackillop N, Dougados M. Synovitis: a potential predictive factor of structural progression of medial tibiofemoral knee osteoarthritis -- results of a 1 year longitudinal arthroscopic study in 422 patients. *Osteoarthritis Cartilage* 2005;13:361-7.
20. Kirwan JR, Bijlsma JW, Boers M, Shea BJ. Effects of glucocorticoids on radiological progression in rheumatoid arthritis. *Cochrane Database Syst Rev* 2007:CD006356.

21. Williams JM, Brandt KD. Triamcinolone hexacetonide protects against fibrillation and osteophyte formation following chemically induced articular cartilage damage. *Arthritis Rheum* 1985;28:1267-74.
22. Pelletier JP, Martel-Pelletier J. Protective effects of corticosteroids on cartilage lesions and osteophyte formation in the Pond-Nuki dog model of osteoarthritis. *Arthritis Rheum* 1989;32:181-93.
23. Pelletier JP, Mineau F, Raynauld JP, Woessner JF, Jr., Gunja-Smith Z, Martel-Pelletier J. Intraarticular injections with methylprednisolone acetate reduce osteoarthritic lesions in parallel with chondrocyte stromelysin synthesis in experimental osteoarthritis. *Arthritis Rheum* 1994;37:414-23.
24. Sedgwick AD, Sin YM, Moore AR, Edwards JC, Willoughby DA. Effects of local administration of hydrocortisone on cartilage degradation in vivo. *Ann Rheum Dis* 1984;43:418-20.
25. Joosten LA, Helsen MM, van den Berg WB. Protective effect of rimexolone on cartilage damage in arthritic mice: a comparative study with triamcinolone hexacetonide. *Agents Actions* 1990;31:135-42.
26. Bellamy N, Campbell J, Robinson V, Gee T, Bourne R, Wells G. Intraarticular corticosteroid for treatment of osteoarthritis of the knee. *Cochrane Database Syst Rev* 2006:CD005328.
27. Behrens F, Shepard N, Mitchell N. Alterations of rabbit articular cartilage by intra-articular injections of glucocorticoids. *J Bone Joint Surg Am* 1975;57:70-6.
28. Moskowitz RW, Davis W, Sammarco J, Mast W, Chase SW. Experimentally induced corticosteroid arthropathy. *Arthritis Rheum* 1970;13:236-43.
29. Canalis E, Mazziotti G, Giustina A, Bilezikian JP. Glucocorticoid-induced osteoporosis: pathophysiology and therapy. *Osteoporos Int* 2007;18:1319-28.
30. Eckstein F, Cicuttini F, Raynauld JP, Waterton JC, Peterfy C. Magnetic resonance imaging (MRI) of articular cartilage in knee osteoarthritis (OA): morphological assessment. *Osteoarthritis Cartilage* 2006.
31. Lo GH, Hunter DJ, Zhang Y, et al. Bone marrow lesions in the knee are associated with increased local bone density. *Arthritis Rheum* 2005;52:2814-21.
32. Lo GH, Zhang Y, McLennan C, et al. The ratio of medial to lateral tibial plateau bone mineral density and compartment-specific tibiofemoral osteoarthritis. *Osteoarthritis Cartilage* 2006;14:984-90.
33. Moller I, Bong D, Naredo E, et al. Ultrasound in the study and monitoring of osteoarthritis. *Osteoarthritis Cartilage* 2008;16 Suppl 3:S4-7.
34. D'Agostino MA, Conaghan P, Le Bars M, et al. EULAR report on the use of ultrasonography in painful knee osteoarthritis. Part 1: prevalence of inflammation in osteoarthritis. *Ann Rheum Dis* 2005;64:1703-9.
35. Vitamin D to Slow Progression of Knee Osteoarthritis. U.S. National Institutes of Health, 2006. (Accessed at <http://clinicaltrials.gov/ct2/show/NCT00306774>.)
36. Lo GH, Schneider E, Majumdar S, et al. Evaluation of Subchondral Trabecular Bone Using 3 Tesla Magnetic Resonance Imaging. *Osteoarthritis and Cartilage* 2006;14:278.
37. Bruce B, Fries JF. The Stanford Health Assessment Questionnaire: a review of its history, issues, progress, and documentation. *J Rheumatol* 2003;30:167-78.
38. Oliveria SA, Felson DT, Reed JI, Cirillo PA, Walker AM. Incidence of symptomatic hand, hip, and knee osteoarthritis among patients in a health maintenance organization. *Arthritis Rheum* 1995;38:1134-41.
39. Guccione AA, Felson DT, Anderson JJ, et al. The effects of specific medical conditions on the functional limitations of elders in the Framingham Study. *Am J Public Health* 1994;84:351-8.
40. Kosorok MR, Omenn GS, Diehr P, Koepsell TD, Patrick DL. Restricted activity days among older adults. *Am J Public Health* 1992;82:1263-7.
41. Kramer JS, Yelin EH, Epstein WV. Social and economic impacts of four musculoskeletal conditions. A study using national community-based data. *Arthritis Rheum* 1983;26:901-7.
42. Hough AJ. Pathology of osteoarthritis. In: Koopman WJ, ed. *Arthritis and Allied Conditions*. 13 ed. Baltimore, MD: Williams & Wilkins; 1997:1945-68.
43. Myers SL, Brandt KD, Ehlich JW, et al. Synovial inflammation in patients with early osteoarthritis of the knee. *J Rheumatol* 1990;17:1662-9.

44. Smith MD, Triantafillou S, Parker A, Youssef PP, Coleman M. Synovial membrane inflammation and cytokine production in patients with early osteoarthritis. *J Rheumatol* 1997;24:365-71.
45. Schumacher HR, Jr. Synovial inflammation, crystals and osteoarthritis. *J Rheumatol* 1995;22:101-3.
46. Gordon GV, Villanueva T, Schumacher HR, Gohel V. Autopsy study correlating degree of osteoarthritis, synovitis and evidence of articular calcification. *J Rheumatol* 1984;11:681-6.
47. Fernandez-Madrid F, Karvonen RL, Teitge RA, Miller PR, An T, Negendank WG. Synovial thickening detected by MR imaging in osteoarthritis of the knee confirmed by biopsy as synovitis. *Magn Reson Imaging* 1995;13:177-83.
48. Lohmander LS, Felson D. Can we identify a 'high risk' patient profile to determine who will experience rapid progression of osteoarthritis? *Osteoarthritis Cartilage* 2004;12 Suppl A:S49-52.
49. Hill CL, Gale DG, Chaisson CE, et al. Knee effusions, popliteal cysts, and synovial thickening: association with knee pain in osteoarthritis. *J Rheumatol* 2001;28:1330-7.
50. Loeuille D, Chary-Valckenaere I, Champigneulle J, et al. Macroscopic and microscopic features of synovial membrane inflammation in the osteoarthritic knee: correlating magnetic resonance imaging findings with disease severity. *Arthritis Rheum* 2005;52:3492-501.
51. Pelletier JP, Raynaud JP, Abram F, Haraoui B, Choquette D, Martel-Pelletier J. A new non-invasive method to assess synovitis severity in relation to symptoms and cartilage volume loss in knee osteoarthritis patients using MRI. *Osteoarthritis Cartilage* 2008;16 Suppl 3:S8-13.
52. Sandy JD. Proteolytic degradation of normal and osteoarthritic cartilage matrix. In: Brandt KD, Doherty M, Lohmander LS, eds. *Osteoarthritis*. Second ed. Oxford: Oxford University Press; 2003:82-92.
53. Jay GD, Elsaid KA, Zack J, et al. Lubricating ability of aspirated synovial fluid from emergency department patients with knee joint synovitis. *J Rheumatol* 2004;31:557-64.
54. Jones AR, Flannery CR. Bioregulation of lubricin expression by growth factors and cytokines. *Eur Cell Mater* 2007;13:40-5; discussion 5.
55. Elsaid KA, Jay GD, Chichester CO. Reduced expression and proteolytic susceptibility of lubricin/superficial zone protein may explain early elevation in the coefficient of friction in the joints of rats with antigen-induced arthritis. *Arthritis Rheum* 2007;56:108-16.
56. Probert L, Plows D, Kontogeorgos G, Kollias G. The type I interleukin-1 receptor acts in series with tumor necrosis factor (TNF) to induce arthritis in TNF-transgenic mice. *Eur J Immunol* 1995;25:1794-7.
57. van de Loo FA, Joosten LA, van Lent PL, Arntz OJ, van den Berg WB. Role of interleukin-1, tumor necrosis factor alpha, and interleukin-6 in cartilage proteoglycan metabolism and destruction. Effect of in situ blocking in murine antigen- and zymosan-induced arthritis. *Arthritis Rheum* 1995;38:164-72.
58. Deleuran BW, Chu CQ, Field M, et al. Localization of tumor necrosis factor receptors in the synovial tissue and cartilage-pannus junction in patients with rheumatoid arthritis. Implications for local actions of tumor necrosis factor alpha. *Arthritis Rheum* 1992;35:1170-8.
59. Farahat MN, Yanni G, Poston R, Panayi GS. Cytokine expression in synovial membranes of patients with rheumatoid arthritis and osteoarthritis. *Ann Rheum Dis* 1993;52:870-5.
60. Pelletier JP, McCollum R, Cloutier JM, Martel-Pelletier J. Synthesis of metalloproteases and interleukin 6 (IL-6) in human osteoarthritic synovial membrane is an IL-1 mediated process. *J Rheumatol Suppl* 1995;43:109-14.
61. McInnes IB, Leung BP, Field M, et al. Production of nitric oxide in the synovial membrane of rheumatoid and osteoarthritis patients. *J Exp Med* 1996;184:1519-24.
62. Pelletier JP, Faure MP, DiBattista JA, Wilhelm S, Visco D, Martel-Pelletier J. Coordinate synthesis of stromelysin, interleukin-1, and oncogene proteins in experimental osteoarthritis. An immunohistochemical study. *Am J Pathol* 1993;142:95-105.
63. Okada Y, Shinmei M, Tanaka O, et al. Localization of matrix metalloproteinase 3 (stromelysin) in osteoarthritic cartilage and synovium. *Lab Invest* 1992;66:680-90.

64. Clark IM, Powell LK, Ramsey S, Hazleman BL, Cawston TE. The measurement of collagenase, tissue inhibitor of metalloproteinases (TIMP), and collagenase-TIMP complex in synovial fluids from patients with osteoarthritis and rheumatoid arthritis. *Arthritis Rheum* 1993;36:372-9.
65. Vankemmelbeke MN, Hohen I, Wilson AG, et al. Expression and activity of ADAMTS-5 in synovium. *Eur J Biochem* 2001;268:1259-68.
66. Mengshol JA, Vincenti MP, Brinckerhoff CE. IL-1 induces collagenase-3 (MMP-13) promoter activity in stably transfected chondrocytic cells: requirement for Runx-2 and activation by p38 MAPK and JNK pathways. *Nucleic Acids Res* 2001;29:4361-72.
67. Mengshol JA, Vincenti MP, Coon CI, Barchowsky A, Brinckerhoff CE. Interleukin-1 induction of collagenase 3 (matrix metalloproteinase 13) gene expression in chondrocytes requires p38, c-Jun N-terminal kinase, and nuclear factor kappaB: differential regulation of collagenase 1 and collagenase 3. *Arthritis Rheum* 2000;43:801-11.
68. DiBattista JA, Martel-Pelletier J, Wosu LO, Sandor T, Antakly T, Pelletier JP. Glucocorticoid receptor mediated inhibition of interleukin-1 stimulated neutral metalloprotease synthesis in normal human chondrocytes. *J Clin Endocrinol Metab* 1991;72:316-26.
69. Hochberg MC, Perlmutter DL, Hudson JI, Altman RD. Preferences in the management of osteoarthritis of the hip and knee: results of a survey of community-based rheumatologists in the United States. *Arthritis Care Res* 1996;9:170-6.
70. Osteoarthritis: national clinical guideline for care and management in adults. In. London: Royal College of Physicians; 2008.
71. Cederlof S, Jonson G. Intraarticular prednisolone injection for osteoarthritis of the knee. A double blind test with placebo. *Acta Chir Scand* 1966;132:532-7.
72. Dieppe PA, Sathapatayavongs B, Jones HE, Bacon PA, Ring EF. Intra-articular steroids in osteoarthritis. *Rheumatol Rehabil* 1980;19:212-7.
73. Friedman DM, Moore ME. The efficacy of intraarticular steroids in osteoarthritis: a double-blind study. *J Rheumatol* 1980;7:850-6.
74. Gaffney K, Ledingham J, Perry JD. Intra-articular triamcinolone hexacetonide in knee osteoarthritis: factors influencing the clinical response. *Ann Rheum Dis* 1995;54:379-81.
75. Jones A, Doherty M. Intra-articular corticosteroids are effective in osteoarthritis but there are no clinical predictors of response. *Ann Rheum Dis* 1996;55:829-32.
76. Miller JH, White J, Norton TH. The value of intra-articular injections in osteoarthritis of the knee. *J Bone Joint Surg Br* 1958;40-B:636-43.
77. Pyne D, Ioannou Y, Mootoo R, Bhanji A. Intra-articular steroids in knee osteoarthritis: a comparative study of triamcinolone hexacetonide and methylprednisolone acetate. *Clin Rheumatol* 2004;23:116-20.
78. Ravaud P, Moulinier L, Giraudeau B, et al. Effects of joint lavage and steroid injection in patients with osteoarthritis of the knee: results of a multicenter, randomized, controlled trial. *Arthritis Rheum* 1999;42:475-82.
79. Sambrook PN, Champion GD, Browne CD, et al. Corticosteroid injection for osteoarthritis of the knee: peripatellar compared to intra-articular route. *Clin Exp Rheumatol* 1989;7:609-13.
80. Smith MD, Wetherall M, Darby T, et al. A randomized placebo-controlled trial of arthroscopic lavage versus lavage plus intra-articular corticosteroids in the management of symptomatic osteoarthritis of the knee. *Rheumatology (Oxford)* 2003;42:1477-85.
81. Stein A, Yassouridis A, Szopko C, Helmke K, Stein C. Intraarticular morphine versus dexamethasone in chronic arthritis. *Pain* 1999;83:525-32.
82. Wright V, Chandler GN, Morison RA, Hartfall SJ. Intra-articular therapy in osteo-arthritis; comparison of hydrocortisone acetate and hydrocortisone tertiary-butylacetate. *Ann Rheum Dis* 1960;19:257-61.
83. Arroll B, Goodyear-Smith F. Corticosteroid injections for osteoarthritis of the knee: meta-analysis. *BMJ* 2004;328:869.



84. Haddad IK. Temporomandibular joint osteoarthritis. Histopathological study of the effects of intra-articular injection of triamcinolone acetonide. *Saudi Med J* 2000;21:675-9.
85. Wada J, Koshino T, Morii T, Sugimoto K. Natural course of osteoarthritis of the knee treated with or without intraarticular corticosteroid injections. *Bull Hosp Jt Dis* 1993;53:45-8.
86. Buckland-Wright C. Protocols for precise radio-anatomical positioning of the tibiofemoral and patellofemoral compartments of the knee. *Osteoarthritis Cartilage* 1995;3 Suppl A:71-80.
87. Buckland-Wright JC, Macfarlane DG, Williams SA, Ward RJ. Accuracy and precision of joint space width measurements in standard and macroradiographs of osteoarthritic knees. *Ann Rheum Dis* 1995;54:872-80.
88. Brandt KD, Mazzuca SA, Conrozier T, et al. Which is the best radiographic protocol for a clinical trial of a structure modifying drug in patients with knee osteoarthritis? *J Rheumatol* 2002;29:1308-20.
89. Seror P, Pluvinage P, d'Andre FL, Benamou P, Attuil G. Frequency of sepsis after local corticosteroid injection (an inquiry on 1160000 injections in rheumatological private practice in France). *Rheumatology (Oxford)* 1999;38:1272-4.
90. Weston VC, Jones AC, Bradbury N, Fawthrop F, Doherty M. Clinical features and outcome of septic arthritis in a single UK Health District 1982-1991. *Ann Rheum Dis* 1999;58:214-9.
91. Berger RG, Yount WJ. Immediate "steroid flare" from intraarticular triamcinolone hexacetonide injection: case report and review of the literature. *Arthritis Rheum* 1990;33:1284-6.
92. Gammer W, Broback LG. Clinical comparison of orgotein and methylprednisolone acetate in the treatment of osteoarthritis of the knee joint. *Scand J Rheumatol* 1984;13:108-12.
93. Bertouch JV, Meffin PJ, Sallustio BC, Brooks PM. A comparison of plasma methylprednisolone concentrations following intra-articular injection in patients with rheumatoid arthritis and osteoarthritis. *Aust N Z J Med* 1983;13:583-6.
94. Lazarevic MB, Skosey JL, Djordjevic-Denic G, Swedler WI, Zgradic I, Myones BL. Reduction of cortisol levels after single intra-articular and intramuscular steroid injection. *Am J Med* 1995;99:370-3.
95. Wellington JE, van Kan BL, Jaitly KD. Suppression of the hypothalamus-pituitary-adrenal system by intra-articular triamcinolone diacetate. *J Endocrinol* 1970;48:lxviii.
96. Courtman NH, Weighill FJ. Systemic tuberculosis in association with intra-articular steroid therapy. *J R Coll Surg Edinb* 1992;37:425.
97. Younes M, Neffati F, Touzi M, et al. Systemic effects of epidural and intra-articular glucocorticoid injections in diabetic and non-diabetic patients. *Joint Bone Spine* 2007;74:472-6.
98. Black DM, Filak AT. Hyperglycemia with non-insulin-dependent diabetes following intraarticular steroid injection. *J Fam Pract* 1989;28:462-3.
99. Patrick M, Doherty M. Facial flushing after intra-articular injection of steroid. *Br Med J (Clin Res Ed)* 1987;295:1380.
100. Jones A, Doherty M. Intra-articular glucocorticoids and other injection therapies. In: Brandt KD, Doherty M, Lohmander LS, eds. *Osteoarthritis*. Second ed. Oxford: Oxford University Press; 2003:277-82.
101. Larsson LG. Anaphylactic shock after i.a. administration of triamcinolone acetonide in a 35-year-old female. *Scand J Rheumatol* 1989;18:441-2.
102. Höpper JM, Carter SR. Anaphylaxis after intra-articular injection of bupivacaine and methylprednisolone. *J Bone Joint Surg Br* 1993;75:505-6.
103. Robinson DE, Harrison-Hansley E, Spencer RF. Steroid psychosis after an intra-articular injection. *Ann Rheum Dis* 2000;59:927.
104. Salter RB, Gross A, Hall JH. Hydrocortisone arthropathy--an experimental investigation. *Can Med Assoc J* 1967;97:374-7.
105. Mankin HJ, Conger KA. The acute effects of intra-articular hydrocortisone on articular cartilage in rabbits. *J Bone Joint Surg Am* 1966;48:1383-8.
106. Chandler GN, Wright V. Deleterious effect of intra-articular hydrocortisone. *Lancet* 1958;2:661-3.

107. Chandler GN, Jones DT, Wright V, Hartfall SJ. Charcot's arthropathy following intra-articular hydrocortisone. *Br Med J* 1959;1:952-3.
108. Chunekamrai S, Krook LP, Lust G, Maylin GA. Changes in articular cartilage after intra-articular injections of methylprednisolone acetate in horses. *Am J Vet Res* 1989;50:1733-41.
109. Mankin HJ, Conger KA. The effect of cortisol on articular cartilage of rabbits. I. Effect of a single dose of cortisol on glycine-C-14 incorporation. *Lab Invest* 1966;15:794-800.
110. Farquhar T, Todhunter RJ, Fubini SL, Burton-Wurster N, Lust G. Effect of methylprednisolone and mechanical loading on canine articular cartilage in explant culture. *Osteoarthritis Cartilage* 1996;4:55-62.
111. Fubini SL, Todhunter RJ, Burton-Wurster N, Vernier-Singer M, MacLeod JN. Corticosteroids alter the differentiated phenotype of articular chondrocytes. *J Orthop Res* 2001;19:688-95.
112. Murphy DJ, Todhunter RJ, Fubini SL, Vernier-Singer M, Straubinger RK, Lust G. The effects of methylprednisolone on normal and monocyte-conditioned medium-treated articular cartilage from dogs and horses. *Vet Surg* 2000;29:546-57.
113. Pelletier JP, Cloutier JM, Martel-Pelletier J. In vitro effects of tiaprofenic acid, sodium salicylate and hydrocortisone on the proteoglycan metabolism of human osteoarthritic cartilage. *J Rheumatol* 1989;16:646-55.
114. Lewandowski B, Bernacka K, Cylwik B, Duda D, Klimiuk PA. Piroxicam and poststeroidal damage of articular cartilage. *Rocz Akad Med Bialymst* 1995;40:396-407.
115. Papachristou G, Anagnostou S, Katsorhis T. The effect of intraarticular hydrocortisone injection on the articular cartilage of rabbits. *Acta Orthop Scand Suppl* 1997;275:132-4.
116. Gogia PP, Brown M, al-Obaidi S. Hydrocortisone and exercise effects on articular cartilage in rats. *Arch Phys Med Rehabil* 1993;74:463-7.
117. Shoemaker RS, Bertone AL, Martin GS, et al. Effects of intra-articular administration of methylprednisolone acetate on normal articular cartilage and on healing of experimentally induced osteochondral defects in horses. *Am J Vet Res* 1992;53:1446-53.
118. Foland JW, McIlwraith CW, Trotter GW, Powers BE, Lamar CH. Effect of betamethasone and exercise on equine carpal joints with osteochondral fragments. *Vet Surg* 1994;23:369-76.
119. Pelletier JP, DiBattista JA, Raynauld JP, Wilhelm S, Martel-Pelletier J. The in vivo effects of intraarticular corticosteroid injections on cartilage lesions, stromelysin, interleukin-1, and oncogene protein synthesis in experimental osteoarthritis. *Lab Invest* 1995;72:578-86.
120. Larsson E, Erlandsson Harris H, Larsson A, Mansson B, Saxne T, Klareskog L. Corticosteroid treatment of experimental arthritis retards cartilage destruction as determined by histology and serum COMP. *Rheumatology (Oxford)* 2004;43:428-34.
121. Pelletier JP, Cloutier JM, Martel-Pelletier J. In vitro effects of NSAIDs and corticosteroids on the synthesis and secretion of interleukin 1 by human osteoarthritic synovial membranes. *Agents Actions Suppl* 1993;39:181-93.
122. Panagides J, Landes MJ, Sloboda AE. Destruction of articular cartilage by arthritic synovium in vitro: mechanism of breakdown and effect of indomethacin and prednisolone. *Agents Actions* 1980;10:22-30.
123. Steinberg J, Tsukamoto S, Sledge CB. A tissue culture model of cartilage breakdown in rheumatoid arthritis. III. Effects of antirheumatic drugs. *Arthritis Rheum* 1979;22:877-85.
124. Radin EL, Martin RB, Burr DB, Caterson B, Boyd RD, Goodwin C. Effects of mechanical loading on the tissues of the rabbit knee. *J Orthop Res* 1984;2:221-34.
125. Hayes WC, Swenson LW, Jr., Schurman DJ. Axisymmetric finite element analysis of the lateral tibial plateau. *J Biomech* 1978;11:21-33.
126. Clark JM, Huber JD. The structure of the human subchondral plate. *J Bone Joint Surg Br* 1990;72:866-73.
127. Hoshino A, Wallace WA. Impact-absorbing properties of the human knee. *J Bone Joint Surg Br* 1987;69:807-11.

128. Westacott C. Subchondral bone in the pathogenesis of osteoarthritis. In: Brandt KD, Doherty M, Lohmander LS, eds. Osteoarthritis. 2nd ed. Oxford: University Press; 2003.
129. Grynblas MD, Alpert B, Katz I, Lieberman I, Pritzker KP. Subchondral bone in osteoarthritis. *Calcif Tissue Int* 1991;49:20-6.
130. Ding M, Odgaard A, Hvid I. Changes in the three-dimensional microstructure of human tibial cancellous bone in early osteoarthritis. *J Bone Joint Surg Br* 2003;85:906-12.
131. Kamibayashi L, Wyss UP, Cooke TD, Zee B. Trabecular microstructure in the medial condyle of the proximal tibia of patients with knee osteoarthritis. *Bone* 1995;17:27-35.
132. Kamibayashi L, Wyss UP, Cooke TD, Zee B. Changes in mean trabecular orientation in the medial condyle of the proximal tibia in osteoarthritis. *Calcif Tissue Int* 1995;57:69-73.
133. Milgram JW. Morphologic alterations of the subchondral bone in advanced degenerative arthritis. *Clin Orthop Relat Res* 1983:293-312.
134. Dieppe P, Cushnaghan J, Young P, Kirwan J. Prediction of the progression of joint space narrowing in osteoarthritis of the knee by bone scintigraphy. *Ann Rheum Dis* 1993;52:557-63.
135. Mazucca SA, Brandt KD, Schauwecker DS, et al. Bone scintigraphy is not a better predictor of progression of knee osteoarthritis than Kellgren and Lawrence grade. *J Rheumatol* 2004;31:329-32.
136. Pessis E, Drape JL, Ravaut P, Chevrot A, Dougados M, Ayrat X. Assessment of progression in knee osteoarthritis: results of a 1 year study comparing arthroscopy and MRI. *Osteoarthritis Cartilage* 2003;11:361-9.
137. Felson DT, McLaughlin S, Goggins J, et al. Bone marrow edema and its relation to progression of knee osteoarthritis. *Ann Intern Med* 2003;139:330-6.
138. Zhang Y, Hannan MT, Chaisson CE, et al. Bone mineral density and risk of incident and progressive radiographic knee osteoarthritis in women: the Framingham Study. *J Rheumatol* 2000;27:1032-7.
139. Hart DJ, Cronin C, Daniels M, Worthy T, Doyle DV, Spector TD. The relationship of bone density and fracture to incident and progressive radiographic osteoarthritis of the knee: the Chingford Study. *Arthritis Rheum* 2002;46:92-9.
140. Bruyere O, Dardenne C, Lejeune E, et al. Subchondral tibial bone mineral density predicts future joint space narrowing at the medial femoro-tibial compartment in patients with knee osteoarthritis. *Bone* 2003;32:541-5.
141. Reid IR. Glucocorticoid effects on bone. *J Clin Endocrinol Metab* 1998;83:1860-2.
142. Conaghan P, D'Agostino MA, Ravaut P, et al. EULAR report on the use of ultrasonography in painful knee osteoarthritis. Part 2: exploring decision rules for clinical utility. *Ann Rheum Dis* 2005;64:1710-4.
143. Grobelaar N, Bouffard JA. Sonography of the knee, a pictorial review. *Semin Ultrasound CT MR* 2000;21:231-74.
144. Kristoffersen H, Torp-Pedersen S, Terslev L, et al. Indications of inflammation visualized by ultrasound in osteoarthritis of the knee. *Acta Radiol* 2006;47:281-6.
145. Wakefield RJ, Green MJ, Marzo-Ortega H, et al. Should oligoarthritis be reclassified? Ultrasound reveals a high prevalence of subclinical disease. *Ann Rheum Dis* 2004;63:382-5.
146. Stegbauer J, Rump LC, Weiner SM. Sites of inflammation in painful rheumatoid shoulder assessed by musculoskeletal ultrasound and power Doppler sonography. *Rheumatol Int* 2008;28:459-65.
147. Iagnocco A, Filippucci E, Perella C, et al. Clinical and ultrasonographic monitoring of response to adalimumab treatment in rheumatoid arthritis. *J Rheumatol* 2008;35:35-40.
148. Iagnocco A, Perella C, Naredo E, et al. Etanercept in the treatment of rheumatoid arthritis: clinical follow-up over one year by ultrasonography. *Clin Rheumatol* 2008;27:491-6.
149. Karim Z, Quinn MA, Wakefield RJ, et al. Response to intramuscular methyl prednisolone in inflammatory hand pain: evidence for a targeted clinical, ultrasonographic and therapeutic approach. *Ann Rheum Dis* 2007;66:690-2.

150. Tarhan S, Ural Z. Magnetic resonance imaging and ultrasonographic evaluation of the patients with knee osteoarthritis: a comparative study. *Clin Rheumatol* 2003;22:181-8.
151. Song IH, Althoff CE, Hermann KG, et al. Knee Osteoarthritis Efficacy of a new method of contrast-enhanced musculoskeletal ultrasonography in detection of synovitis in patients with knee osteoarthritis in comparison with magnetic resonance imaging. *Ann Rheum Dis* 2007.
152. Walther M, Harms H, Krenn V, Radke S, Faehndrich TP, Gohlke F. Correlation of power Doppler sonography with vascularity of the synovial tissue of the knee joint in patients with osteoarthritis and rheumatoid arthritis. *Arthritis Rheum* 2001;44:331-8.
153. Takase K, Ideguchi H, Ohno S, et al. Comparison Of Ultrasonography And MRI Assessment Of Synovitis With Histopathological Findings In Patients With Osteoarthritis And Rheumatoid Arthritis. *Arthritis & Rheumatism* 2008;58:S407.
154. d'Anjou MA, Troncy E, Moreau M, et al. Response to the Letter to the Editor by Roemer and collaborators entitled "MRI based semi-quantitative assessment of subchondral bone marrow lesions in osteoarthritis research" concerning the article published by d'Anjou et al. entitled "Temporal assessment of bone marrow lesions on magnetic resonance imaging in a canine model of knee osteoarthritis: impact of sequence selection.". *Osteoarthritis Cartilage* 2008.
155. Pelletier JP, Raynauld JP, Abram F, Haraoui B, Choquette D, Martel-Pelletier J. Response to the Letter to the Editor by Roemer and collaborators entitled "Semiquantitative assessment of synovitis in osteoarthritis on non contrast-enhanced MRI" concerning the article published by Pelletier et al. entitled "A new non-invasive method to assess synovitis severity in relation to symptoms and cartilage volume loss in knee osteoarthritis patients using MRI". *Osteoarthritis Cartilage* 2008;17:822-4.
156. Roemer FW, Hunter DJ, Guermazi A. Semiquantitative assessment of synovitis in osteoarthritis on non contrast-enhanced MRI. *Osteoarthritis Cartilage* 2009;17:820-1; author reply 2-4.
157. Ostergaard M, Stoltenberg M, Gideon P, Sorensen K, Henriksen O, Lorenzen I. Changes in synovial membrane and joint effusion volumes after intraarticular methylprednisolone. Quantitative assessment of inflammatory and destructive changes in arthritis by MRI. *J Rheumatol* 1996;23:1151-61.
158. Ostergaard M, Stoltenberg M, Henriksen O, Lorenzen I. The accuracy of MRI-determined synovial membrane and joint effusion volumes in arthritis. A comparison of pre- and post-aspiration volumes. *Scand J Rheumatol* 1995;24:305-11.
159. Tan AL, Wakefield RJ, Conaghan PG, Emery P, McGonagle D. Imaging of the musculoskeletal system: magnetic resonance imaging, ultrasonography and computed tomography. *Best Pract Res Clin Rheumatol* 2003;17:513-28.
160. Marra MD, Roemer FW, Crema MD, et al. Peripatellar synovitis in osteoarthritis: comparison of non-enhanced and enhanced magnetic resonance imaging and its association with peripatellar knee pain. The MOST study. *Osteoarthritis and Cartilage* 2008;16 (Suppl 4):S167.
161. Kay J. Nephrogenic systemic fibrosis: a new concern for rheumatologists. *Nat Clin Pract Rheumatol* 2008;4:445.
162. Maschek S, Wirth W, Wyman BT, et al. Impact of the contrast agent gadopentate dimeglumine on quantitative magnetic resonance imaging of cartilage morphology. *Osteoarthritis and Cartilage* 2008;16 (Supplement 4):S174.
163. Beuf O, Ghosh S, Newitt DC, et al. Magnetic resonance imaging of normal and osteoarthritic trabecular bone structure in the human knee. *Arthritis Rheum* 2002;46:385-93.
164. McAlindon TE, Watt I, McCrae F, Goddard P, Dieppe P. A. Magnetic resonance imaging in osteoarthritis of the knee: correlation with radiographic and scintigraphic findings. *Annals of the Rheumatic Diseases* 1991;50:14-9.
165. Adams JG, McAlindon T, Dimasi M, Carey J, Eustace S. Contribution of meniscal extrusion and cartilage loss to joint space narrowing in osteoarthritis. *Clin Radiol* 1999;54:502-6.
166. Cicuttini F, Forbes A, Morris K, Darling S, Bailey M, Stuckey S. Gender differences in knee cartilage volume as measured by magnetic resonance imaging. *Osteoarthritis Cartilage* 1999;7:265-71.

167. Cohen ZA, McCarthy DM, Kwak SD, et al. Knee cartilage topography, thickness, and contact areas from MRI: in-vitro calibration and in-vivo measurements. *Osteoarthritis Cartilage* 1999;7:95-109.
168. Eckstein F, Gavazzeni A, Sittek H, et al. Determination of knee joint cartilage thickness using three-dimensional magnetic resonance chondro-crassometry (3D MR-CCM). *Magn Reson Med* 1996;36:256-65.
169. Eckstein F, Adam C, Sittek H, et al. Non-invasive determination of cartilage thickness throughout joint surfaces using magnetic resonance imaging. *J Biomech* 1997;30:285-9.
170. Eckstein F, Stammberger T, Priebsch J, Englmeier KH, Reiser M. Effect of gradient and section orientation on quantitative analysis of knee joint cartilage. *J Magn Reson Imaging* 2000;11:469-70.
171. Kladny B, Bail H, Swoboda B, Schiwy-Bochat H, Beyer WF, Weseloh G. Cartilage thickness measurement in magnetic resonance imaging. *Osteoarthritis Cartilage* 1996;4:181-6.
172. Peterfy CG, van Dijke CF, Janzen DL, et al. Quantification of articular cartilage in the knee with pulsed saturation transfer subtraction and fat-suppressed MR imaging: optimization and validation. *Radiology* 1994;192:485-91.
173. Piplani MA, Disler DG, McCauley TR, Holmes TJ, Cousins JP. Articular cartilage volume in the knee: semiautomated determination from three-dimensional reformations of MR images. *Radiology* 1996;198:855-9.
174. Burgkart R, Glaser C, Hyhlik-Durr A, Englmeier KH, Reiser M, Eckstein F. Magnetic resonance imaging-based assessment of cartilage loss in severe osteoarthritis: accuracy, precision, and diagnostic value. *Arthritis Rheum* 2001;44:2072-7.
175. Raynauld JP, Kauffman C, Berthiaume JP, et al. Validation of a quantification imaging system for the normal and the osteoarthritis knee. *Arthritis Rheum* 2001;44.
176. Cicuttini FM, Wluka AE, Stuckey SL. Tibial and femoral cartilage changes in knee osteoarthritis. *Ann Rheum Dis* 2001;60:977-80.
177. Wluka AE, Davis SR, Bailey M, Stuckey SL, Cicuttini FM. Users of oestrogen replacement therapy have more knee cartilage than non-users. *Ann Rheum Dis* 2001;60:332-6.
178. Eckstein F, Lemberger B, Stammberger T, Englmeier KH, Reiser M. Patellar cartilage deformation in vivo after static versus dynamic loading. *J Biomech* 2000;33:819-25.
179. Waterton JC, Solloway S, Foster JE, et al. Diurnal variation in the femoral articular cartilage of the knee in young adult humans. *Magn Reson Med* 2000;43:126-32.
180. Wluka AE, Wolfe R, Stuckey S, Cicuttini FM. How does tibial cartilage volume relate to symptoms in subjects with knee osteoarthritis? *Ann Rheum Dis* 2004;63:264-8.
181. Cicuttini FM, Jones G, Forbes A, Wluka AE. Rate of cartilage loss at two years predicts subsequent total knee arthroplasty: a prospective study. *Ann Rheum Dis* 2004.
182. Peterfy CG, White DL, Zhao J, Van Dijke CF, Genant HK. Longitudinal measurement of knee articular cartilage volume in osteoarthritis. *Arthritis Rheum* 1998;41.
183. Berthiaume MJ, DeGuise J, Gagnon R, et al. Knee osteoarthritis progression evaluated by magnetic resonance imaging and a novel quantification software tool. *Arthritis Rheum* 2000;43 (Suppl 9):S399.
184. Lynch JA, Zaim S, Zhao J, Peterfy CG, Genant HK. Cartilage lesion development following meniscal surgery measured from serial MRI of the knee using image registration and segmentation. *Arthritis Rheum* 2001;2001.
185. Wluka AE, Stuckey S, Snaddon J, Cicuttini FM. The determinants of change in tibial cartilage volume in osteoarthritic knees. *Arthritis Rheum* 2002;46:2065-72.
186. Raynauld JP, Pelletier JP, Beaudoin G, et al. A two-year study in osteoarthritis patients following the progression of disease by magnetic resonance imaging using a novel quantification system. *Arthritis Rheum* 2002;46:S311.
187. Gandy SJ, Dieppe PA, Keen MC, Maciewicz RA, Watt I, Waterton JC. No loss of cartilage volume over three years in patients with knee osteoarthritis as assessed by magnetic resonance imaging. *Osteoarthritis Cartilage* 2002;10:929-37.

188. Cicuttini FM, Forbes A, Yuanyuan W, Rush G, Stuckey SL. Rate of knee cartilage loss after partial meniscectomy. *J Rheumatol* 2002;29:1954-6.
189. Raynauld JP, Martel-Pelletier J, Berthiaume MJ, et al. Long term evaluation of disease progression through the quantitative magnetic resonance imaging of symptomatic knee osteoarthritis patients: correlation with clinical symptoms and radiographic changes. *Arthritis Res Ther* 2005;8:R21.
190. Berthiaume MJ, Raynauld JP, Martel-Pelletier J, et al. Meniscal tear and extrusion are strongly associated with progression of symptomatic knee osteoarthritis as assessed by quantitative magnetic resonance imaging. *Ann Rheum Dis* 2005;64:556-63.
191. Raynauld JP, Martel-Pelletier J, Berthiaume MJ, et al. Quantitative magnetic resonance imaging evaluation of knee osteoarthritis progression over two years and correlation with clinical symptoms and radiologic changes. *Arthritis Rheum* 2004;50:476-87.
192. Wildy KS, Zaim S, Peterfy CG, Newman AB, Kritchevsky S, Nevitt MC. Reliability of the whole-organ review MRI scoring (WORMS) method for knee osteoarthritis (OA) in a multicenter study. *Arthritis Rheum* 2001;44.
193. Biswal S, Hastie T, Andriacchi TP, Bergman GA, Dillingham MF, Lang P. Risk factors for progressive cartilage loss in the knee: a longitudinal magnetic resonance imaging study in forty-three patients. *Arthritis Rheum* 2002;46:2884-92.
194. Hunter DJ, March LM, Sambrook PN. The association of altered subchondral architecture with pain in knee osteoarthritis. *Arthritis Rheum* 2001;44.
195. Peterfy CG, Guermazi A, Zaim S, et al. Whole-Organ Magnetic Resonance Imaging Score (WORMS) of the knee in osteoarthritis. *Osteoarthritis Cartilage* 2004;12:177-90.
196. Hunter DJ, Gale D, Grainger G, Lo G, Conaghan P. Development and reliability of a new scoring system for OA features on MRI of the knee. *Osteoarthritis & Cartilage* 2005;13:241.
197. Watson PJ, Hall LD, Malcolm A, Tyler JA. Degenerative joint disease in the guinea pig. Use of magnetic resonance imaging to monitor progression of bone pathology. *Arthritis Rheum* 1996;39:1327-37.
198. Lindsey CT, Narasimhan A, Adolfo JM, et al. Magnetic resonance evaluation of the interrelationship between articular cartilage and trabecular bone of the osteoarthritic knee. *Osteoarthritis Cartilage* 2004;12:86-96.
199. Blumenkrantz G, Lindsey CT, Dunn TC, et al. A pilot, two-year longitudinal study of the interrelationship between trabecular bone and articular cartilage in the osteoarthritic knee. *Osteoarthritis Cartilage* 2004;12:997-1005.
200. Majumdar S, Kothari M, Augat P, et al. High-resolution magnetic resonance imaging: three-dimensional trabecular bone architecture and biomechanical properties. *Bone* 1998;22:445-54.
201. Majumdar S, Newitt D, Jergas M, et al. Evaluation of technical factors affecting the quantification of trabecular bone structure using magnetic resonance imaging. *Bone* 1995;17:417-30.
202. Lancianese SL, Kwok E, Beck CA, Lerner AL. Predicting regional variations in trabecular bone mechanical properties within the human proximal tibia using MR imaging. *Bone* 2008;43:1039-46.
203. Majumdar S, Genant HK, Grampp S, et al. Correlation of trabecular bone structure with age, bone mineral density, and osteoporotic status: in vivo studies in the distal radius using high resolution magnetic resonance imaging. *J Bone Miner Res* 1997;12:111-8.
204. Lo GH, Schneider E, Majumdar S, et al. Evaluation of Subchondral Trabecular Bone Using 3 Tesla (3T) Magnetic Resonance Imaging. *Osteoarthritis and Cartilage* 2006;14:S151 (Abstract #P278).
205. McAlindon T, Formica M, Kabbara K, LaValley M, Lehmer M. Conducting clinical trials over the internet: feasibility study. *BMJ* 2003;327:484-7.
206. McAlindon T, Formica M, Schmid CH, Fletcher J. Changes in barometric pressure and ambient temperature influence osteoarthritis pain. *Am J Med* 2007;120:429-34.
207. Formica M, Kabbara K, Clark R, McAlindon T. Can clinical trials requiring frequent participant contact be conducted over the Internet? Results from an online randomized controlled trial evaluating a topical ointment for herpes labialis. *J Med Internet Res* 2004;6:e6.

208. McAlindon T, Wang J, Formica M, et al. Feasibility and validity were demonstrated of an online case-control study using the prototype of recent-onset systemic lupus erythematosus. *J Clin Epidemiol* 2008;61:671-8.
209. Hargreaves BA, Gold GE, Beaulieu CF, Vasanawala SS, Nishimura DG, Pauly JM. Comparison of new sequences for high-resolution cartilage imaging. *Magn Reson Med* 2003;49:700-9.
210. Lecouvet FE, Claus J, Schmitz P, Denolin V, Bos C, Vande Berg BC. Clinical evaluation of automated scan prescription of knee MR images. *J Magn Reson Imaging* 2009;29:141-5.
211. Bauer JS, Krause SJ, Ross CJ, et al. Volumetric cartilage measurements of porcine knee at 1.5-T and 3.0-T MR imaging: evaluation of precision and accuracy. *Radiology* 2006;241:399-406.
212. Hunter DJ, Lo GH, Gale D, Grainger AJ, Guermazi A, Conaghan PG. The development and reliability of a new scoring system for knee osteoarthritis MRI: BLOKS (Boston Leeds Osteoarthritis Knee Score). *Ann Rheum Dis* 2007.
213. Lo GH, Dumoulin-Richez C, Nuite M, et al. Strong Association Between Tibial Plateau Bone Mineral Density and Cartilage Damage in Osteoarthritis. *Arthritis & Rheumatism* 2007;56:Abstract #203.
214. Lo GH, Hunter DJ, Nevitt M, Lynch J, McAlindon TE. Strong Association of Meniscal Maceration and Bone Marrow Lesions in Osteoarthritis. *Arthritis & Rheumatism* 2007;56:Abstract #202.
215. Lo GH, Hunter DJ, Nevitt M, Lynch J, McAlindon TE. Strong Association of MRI Meniscal Derangement and Bone Marrow Lesions in Knee Osteoarthritis: Data from the Osteoarthritis Initiative. *Osteoarthritis and Cartilage* 2009;in press.
216. Lo GH, McAlindon TE, Niu J, et al. Strong Association of Bone Marrow Lesions and Effusion with Pain in Osteoarthritis. *Arthritis & Rheumatism* 2007;56:Abstract #2077.
217. Lo GH, McAlindon TE, Niu J, et al. Strong Association of Bone Marrow Lesions and Effusion with Pain in Osteoarthritis. *Osteoarthritis and Cartilage* 2009;Under revision.
218. Hurwitz DE, Sumner DR, Andriacchi TP, Sugar DA. Dynamic knee loads during gait predict proximal tibial bone distribution. *J Biomech* 1998;31:423-30.
219. Lo GH, Zhang Y, McLennan CE, et al. The Ratio of Medial to Lateral Tibial Plateau Bone Mineral Density and Compartment Specific Tibiofemoral Osteoarthritis. *Osteoarthritis Cartilage* 2006;14.
220. Lo GH, McAdams EL, Smith MH, et al. Tibial Plateau Proximal and Distal Bone Behave Similarly: Both are Associated with Features of Knee Osteoarthritis. *Osteoarthritis and Cartilage* 2008;16:Abstract #137.
221. Lo GH, Smith MH, McAdams EL, et al. Baseline Vitamin D Status is Predictive of Longitudinal Change in Tibial BMD in Knee Osteoarthritis. *Arthritis & Rheumatism* 2008;58:Abstract #193.
222. Smith MH, Lo GH, Nuite M, et al. Increased Medial Tibial Bone Mineral Density is Associated with Walking Deterioration in Walking Ability and Pain in Individuals with Knee Osteoarthritis. *Arthritis & Rheumatism* 2008;58:Abstract #697.
223. Vazquez E, Song LY, Dawson-Hughes B. Precision of bone mineral density scans at the proximal tibia in osteoarthritic subjects. *J Clin Densitom* 2004;7:364-7.
224. LaValley MP, McAlindon TE, Chaisson CE, Levy D, Felson DT. The validity of different definitions of radiographic worsening for longitudinal studies of knee osteoarthritis. *J Clin Epidemiol* 2001;54:30-9.
225. Mazzuca SA, Brandt KD, Katz BP, et al. Subject retention and adherence in a randomized placebo-controlled trial of a disease-modifying osteoarthritis drug. *Arthritis Rheum* 2004;51:933-40.
226. Rubaltelli L, Fiocco U, Cozzi L, et al. Prospective sonographic and arthroscopic evaluation of proliferative knee joint synovitis. *J Ultrasound Med* 1994;13:855-62.
227. Fiocco U, Cozzi L, Rubaltelli L, et al. Long-term sonographic follow-up of rheumatoid and psoriatic proliferative knee joint synovitis. *Br J Rheumatol* 1996;35:155-63.
228. Iagnocco A, Epis O, Delle Sedie A, et al. Ultrasound imaging for the rheumatologist. XVII. Role of colour Doppler and power Doppler. *Clin Exp Rheumatol* 2008;26:759-62.
229. Hunter DJ, Lo GH, Gale D, Grainger AJ, Guermazi A, Conaghan PG. The reliability of a new scoring system for knee osteoarthritis MRI and the validity of bone marrow lesion assessment: BLOKS (Boston Leeds Osteoarthritis Knee Score). *Ann Rheum Dis* 2008;67:206-11.

230. Reichenbach S, Guermazi A, Niu J, et al. Prevalence of bone attrition on knee radiographs and MRI in a community-based cohort. *Osteoarthritis Cartilage* 2008;16:1005-10.
231. Carbone LD, Nevitt MC, Wildy K, et al. The relationship of antiresorptive drug use to structural findings and symptoms of knee osteoarthritis. *Arthritis Rheum* 2004;50:3516-25.
232. Healthcare G. Lunar Prodigy Direct-Digital Densitometry. 2004:1-12.
233. Akamatsu Y, Koshino T, Saito T, Wada J. Changes in osteosclerosis of the osteoarthritic knee after high tibial osteotomy. *Clin Orthop* 1997:207-14.
234. Bohr HH, Schaadt O. Mineral content of upper tibia assessed by dual photon densitometry. *Acta Orthop Scand* 1987;58:557-9.
235. Hulet C, Sabatier JP, Souquet D, Locker B, Marcelli C, Vielpeau C. Distribution of bone mineral density at the proximal tibia in knee osteoarthritis. *Calcif Tissue Int* 2002;71:315-22.
236. Katsuragawa Y, Fukui N, Nakamura K. Change of bone mineral density with valgus knee bracing. *Int Orthop* 1999;23:164-7.
237. Wada M, Maezawa Y, Baba H, Shimada S, Sasaki S, Nose Y. Relationships among bone mineral densities, static alignment and dynamic load in patients with medial compartment knee osteoarthritis. *Rheumatology (Oxford)* 2001;40:499-505.
238. Healthcare G. Lunar Prodigy Advance. 2005:1-2.
239. Bellamy N, Buchanan WW, Goldsmith CH, Campbell J, Stitt LW. Validation study of WOMAC: a health status instrument for measuring clinically important patient relevant outcomes to antirheumatic drug therapy in patients with osteoarthritis of the hip or knee. *J Rheumatol* 1988;15:1833-40.
240. Bellamy N. Pain assessment in osteoarthritis: experience with the WOMAC osteoarthritis index. *Semin Arthritis Rheum* 1989;18:14-7.
241. Bellamy N, Buchanan WW. A preliminary evaluation of the dimensionality and clinical importance of pain and disability in osteoarthritis of the hip and knee. *Clin Rheumatol* 1986;5:231-41.
242. Bellamy N. WOMAC: A 20-Year Experiential Review of a Patient-Centered Self-Reported Health Status Questionnaire. *J Rheumatol* 2002;29:2473-6.
243. Bellamy N. WOMAC Osteoarthritis Index User Guide. Version V. Brisbane, Australia; 2002.
244. Bellamy N, Kean WF, Buchanan WW, Gercz-Simon E, Campbell J. Double blind randomized controlled trial of sodium meclofenamate (Meclomen) and diclofenac sodium (Voltaren): post validation reapplication of the WOMAC Osteoarthritis Index. *J Rheumatol* 1992;19:153-9.
245. Bellamy N, Buchanan WW, Chalmers A, et al. A multicenter study of tenoxicam and diclofenac in patients with osteoarthritis of the knee. *J Rheumatol* 1993;20:999-1004.
246. Stucki G, Sangha O, Stucki S, et al. Comparison of the WOMAC (Western Ontario and McMaster Universities) osteoarthritis index and a self-report format of the self-administered Lequesne-Algofunctional index in patients with knee and hip osteoarthritis. *Osteoarthritis Cartilage* 1998;6:79-86.
247. McGroarty BJ, Harris WH. Can the western Ontario and McMaster Universities (WOMAC) osteoarthritis index be used to evaluate different hip joints in the same patient? *J Arthroplasty* 1996;11:841-4.
248. SF-36® Health Survey. QualityMetric Incorporated, 2003. (Accessed 2003, at <http://www.qualitymetric.com/innohome/insf36.shtml>.)
249. Verbeke G, Molenberghs G. *Linear Mixed Models for Longitudinal Data*. New York: Springer-Verlag; 2000.
250. Chang BH, Pocock S. Analyzing data with clumping at zero. An example demonstration. *J Clin Epidemiol* 2000;53:1036-43.
251. Zhang H, Holford T, Bracken MB. A tree-based method of analysis for prospective studies. *Stat Med* 1996;15:37-49.
252. Hedges LV, Olkin I. *Statistical Methods for Meta-Analysis*. San Diego, CA: Academic Press, Inc.; 1985.



253. Raynauld JP, Martel-Pelletier J, Berthiaume MJ, et al. Long term evaluation of disease progression through the quantitative magnetic resonance imaging of symptomatic knee osteoarthritis patients: correlation with clinical symptoms and radiographic changes. *Arthritis Res Ther* 2006;8:R21.
254. Raynauld JP, Martel-Pelletier J, Bias P, et al. Protective effects of licofelone, a 5-lipoxygenase and cyclooxygenase inhibitor, versus naproxen on cartilage loss in knee osteoarthritis: a first Multi-Centre Clinical Trial using quantitative MRI. *Ann Rheum Dis* 2008.
255. Deyle GD, Henderson NE, Matekel RL, Ryder MG, Garber MB, Allison SC. Effectiveness of manual physical therapy and exercise in osteoarthritis of the knee. A randomized, controlled trial. *Ann Intern Med* 2000;132:173-81.
256. Fransen M, Crosbie J, Edmonds J. Physical therapy is effective for patients with osteoarthritis of the knee: a randomized controlled clinical trial. *J Rheumatol* 2001;28:156-64.
257. Baker K, McAlindon T. Exercise for knee osteoarthritis. *Curr Opin Rheumatol* 2000;12:456-63.
258. Baker KR, Nelson ME, Felson DT, Layne JE, Sarno R, Roubenoff R. The efficacy of home based progressive strength training in older adults with knee osteoarthritis: a randomized controlled trial. *J Rheumatol* 2001;28:1655-65.
259. Felson DT, Chaisson CE, Hill CL, et al. The association of bone marrow lesions with pain in knee osteoarthritis. *Ann Intern Med* 2001;134:541-9.
260. Hunter DJ, Zhang Y, Niu J, et al. Increase in bone marrow lesions associated with cartilage loss: A longitudinal magnetic resonance imaging study of knee osteoarthritis. *Arthritis Rheum* 2006;54:1529-35.
261. Sowers MF, Hayes C, Jamadar D, et al. Magnetic resonance-detected subchondral bone marrow and cartilage defect characteristics associated with pain and X-ray-defined knee osteoarthritis. *Osteoarthritis Cartilage* 2003;11:387-93.
262. Garnero P, Peterfy C, Zaim S, Schoenharling M. Bone marrow abnormalities on magnetic resonance imaging are associated with type II collagen degradation in knee osteoarthritis: a three-month longitudinal study. *Arthritis Rheum* 2005;52:2822-9.
263. Dougados M, Leclaire P, van der Heijde D, Bloch DA, Bellamy N, Altman RD. Response criteria for clinical trials on osteoarthritis of the knee and hip: a report of the Osteoarthritis Research Society International Standing Committee for Clinical Trials response criteria initiative. *Osteoarthritis Cartilage* 2000;8:395-403.
264. Angst F, Aeschlimann A, Steiner W, Stucki G. Responsiveness of the WOMAC osteoarthritis index as compared with the SF-36 in patients with osteoarthritis of the legs undergoing a comprehensive rehabilitation intervention. *Ann Rheum Dis* 2001;60:834-40.
265. Nilsson AK, Roos EM, Westerlund JP, Roos HP, Lohmander LS. Comparative responsiveness of measures of pain and function after total hip replacement. *Arthritis Rheum* 2001;45:258-62.

# Appendix A:

## Study Timeline

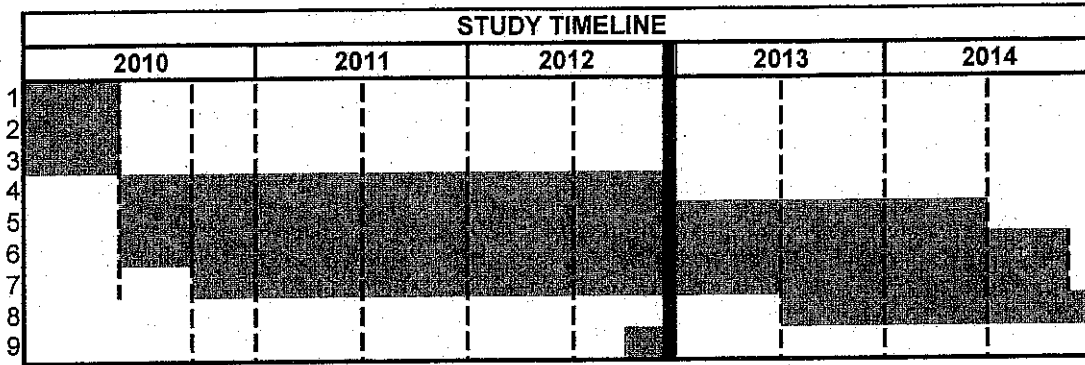

1. Development and testing of the website and electronic data capture systems
2. Construction of the manual of operations, assembly of DSMB, start-up DSMB meeting
3. Acquisition and deployment of study materials (e.g. injection kit, ultrasound scanner, medication)
4. Advertising and recruitment
5. Conduct of the clinical trial
6. Quality control of study DXA scans and MRIs
7. Interpretation, scoring of paired MRIs
8. Data processing, cleaning & analysis; presentation of findings; manuscript preparation
9. **Adaptive interim analysis.** Timeline for subsequent study activities will be truncated if the study is stopped early.

## Appendix B

### Schedule of Events and Examinations

| What ↓<br>When →                                                   | Month<br>-1<br>Screen | Month<br>0 | Month<br>3 | Month<br>6 | Month<br>9 | Month<br>12 | Month<br>15 | Month<br>18 | Month<br>21 | Month<br>24 | Early<br>Term<br>(ET)* |
|--------------------------------------------------------------------|-----------------------|------------|------------|------------|------------|-------------|-------------|-------------|-------------|-------------|------------------------|
| Consents                                                           | X                     |            |            |            |            |             |             |             |             |             |                        |
| Medical-Surgical<br>history                                        | X                     |            |            |            |            |             |             |             |             |             |                        |
| Height & weight                                                    | X                     | X          |            |            |            | X           |             |             |             | X           | X                      |
| Knee exam                                                          | X                     | X          |            |            |            | X           |             |             |             | X           | X                      |
| Knee x-rays                                                        | X                     |            |            |            |            |             |             |             |             |             |                        |
| Knee ultrasound                                                    | X                     | X          |            | X          |            | X           |             | X           |             | X           | X                      |
| MRI of study knee                                                  |                       | X          |            |            |            | X           |             |             |             | X           | X                      |
| Bone density test                                                  |                       | X          |            |            |            | X           |             |             |             | X           | X                      |
| Knee study injection                                               |                       | X          | X          | X          | X          | X           | X           | X           | X           |             |                        |
| Blood tests                                                        | X                     | X          | X          | X          | X          | X           | X           | X           | X           | X           | X                      |
| Knee synovial fluid<br>for storage                                 |                       | X          | X          | X          | X          | X           | X           | X           | X           | X           | X                      |
| Blood collection<br>(serum, plasma, and<br>white cell) for storage |                       | X          |            |            |            | X           |             |             |             | X           | X                      |
| Urine collection for<br>storage                                    |                       | X          |            |            |            | X           |             |             |             | X           | X                      |
| Questionnaires                                                     | X                     | X          | X          | X          | X          | X           | X           | X           | X           | X           | X                      |
| Physical function<br>tests                                         |                       | X          |            | X          |            | X           |             | X           |             | X           | X                      |
| Observed Gait<br>Analysis (optional)                               |                       | X          |            |            |            | X           |             |             |             | X           |                        |
| Review all medicines                                               | X                     | X          | X          | X          | X          | X           | X           | X           | X           | X           | X                      |
| Review of adverse<br>events / side effects                         |                       | X          | X          | X          | X          | X           | X           | X           | X           | X           | X                      |
| Review your study<br>calendar/diary/journal                        |                       | X          | X          | X          | X          | X           | X           | X           | X           | X           | X                      |

\*Early Termination (ET) visit is performed only if the participant withdraws from the study prior to completion.

## Appendix C

### ACR Criteria for Classification of Idiopathic Knee Osteoarthritis

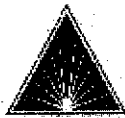

**AMERICAN COLLEGE  
OF RHEUMATOLOGY**  
EDUCATION • TREATMENT • RESEARCH

#### [1986] Criteria for Classification of Idiopathic Osteoarthritis (OA) of the Knee\*.

##### **Clinical and laboratory**

Knee pain

- + at least 5 of 9:
  - Age > 50 years
  - Stiffness < 30 minutes
  - Crepitus
  - Bony Tenderness
  - Bony enlargement
  - No palpable warmth
  - ESR < 40 mm/hour
  - RF < 1:40
  - SF OA

92% sensitive

75% specific

##### **Clinical and radiographic**

Knee pain

- + at least 1 of 3:
  - Age > 50 years
  - Stiffness < 30 minutes
  - Crepitus
- + Osteophytes

91% sensitive

86% specific

##### **Clinical†**

Knee pain

- + at least 3 of 6:
  - Age > 50 years
  - Stiffness < 30 minutes
  - Crepitus
  - Bony Tenderness
  - Bony enlargement
  - No palpable warmth

95% sensitive

69% specific

\* ESR = erythrocyte sedimentation rate (Westergren); RF = rheumatoid factor; SF OA = synovial fluid signs of OA (clear, viscous, or white blood cell count < 2,000/mm<sup>3</sup>).

† Alternative for the clinical category would be 4 of 6, which is 84% sensitive and 89% specific.

R. Altman, E. Asch, D. Bloch, G. Bole, D. Borenstein, K. Brandt, et al. *The American College of Rheumatology criteria for the classification and reporting of osteoarthritis of the knee. Arthritis Rheum 1986;29:1039-1049.*

©2004 American College of Rheumatology

## Appendix D

### Kellgren and Lawrence Radiographic Grading System for Osteoarthritis

| <u>Grade</u> | <u>Classification</u> | <u>Description</u>                                              |
|--------------|-----------------------|-----------------------------------------------------------------|
| 0            | Normal                | No features of OA                                               |
| 1            | Doubtful              | Minute osteophyte, doubtful significance                        |
| 2            | Minimal               | Definite osteophyte, unimpaired joint space                     |
| 3            | Moderate              | Moderate diminution of joint space                              |
| 4            | Severe                | Joint space greatly impaired with sclerosis of subchondral bone |

## Appendix E

### **WOMAC Questionnaire**

The Western Ontario and McMaster Universities OA Index (WOMAC), is a disease –specific instrument used to measure symptoms and physical functioning of patients with osteoarthritis of the hip and knee. It contains twenty-four items (5 pain, 2 stiffness, and 17 physical function) and takes approximately ten minutes for the participant to complete. The validity, reliability, and responsiveness of the WOMAC has been demonstrated in the OA population, and has become a standard instrument utilized in clinical studies.

### **SF-36v2™**

The SF-36 is a multi-purpose, short-form health survey consisting of 36 questions. It yields an 8-scale profile of functional health and well-being scores as well as psychometrically-based physical and mental health summary measures and a preference-based health utility index. It is a generic measure, as opposed to one that targets a specific age, disease, or treatment group. Accordingly, the SF-36 has proven useful in surveys of general and specific populations, comparing the relative burden of diseases, and in differentiating the health benefits produced by a wide range of different treatments.

### **Stanford Health Assessment Questionnaire**

The Stanford Health Assessment Questionnaire (HAQ) is a well-validated and widely used instrument that originated from work on rheumatic disease populations and collects data on domains of disability, pain, adverse treatment effects and healthcare costs<sup>37</sup>. The elements that we will utilize for this study include the HAQ *Disability Index*, which assesses a patient's level of functional ability, as well as questions about drug toxicity, and medical cost data both direct (e.g. physician visits, medications) and indirect (e.g. loss of productivity).

### **Global Knee Pain Severity Scale**

Knee pain severity (not activity-specific) during the past 30 days assessed using a 0-10 numerical rating scale. The validity of numerical rating scales has been well documented, they are easy to administer and score, and can be used with a greater variety of participants than can a visual analog scale. Numeric rating scales can also be administered over the telephone to participants who become unable to visit the clinic.

**Appendix E**

**MRI Screening Form**

**TUFTS MEDICAL CENTER**

**DEPARTMENT OF RADIOLOGY-OUTPATIENT MRI**

1) Patient Name: \_\_\_\_\_ Hospital #: \_\_\_\_\_

2) Has placement of an intravenous line been difficult in the past?

Yes: \_\_\_\_\_ No: \_\_\_\_\_ If yes, describe: \_\_\_\_\_

3) Do you have an intravenous access device?

Yes: \_\_\_\_\_ No: \_\_\_\_\_ If yes, which? Broviac \_\_\_\_\_ Hickman \_\_\_\_\_ Infusaport \_\_\_\_\_

4) Do you have any allergies to food, medications or latex?

Yes: \_\_\_\_\_ No: \_\_\_\_\_ If yes, list.

5) Please list medications, including over the counter medications, with the doses that you currently take.

6) Please list surgical operations you have had.

7) Do you have any of the following medical problems?

Asthma or Shortness of breath: Yes: \_\_\_\_\_ No: \_\_\_\_\_

Hypertension: Yes: \_\_\_\_\_ No: \_\_\_\_\_

Diabetes: Yes: \_\_\_\_\_ No: \_\_\_\_\_

Kidney failure: Yes: \_\_\_\_\_ No: \_\_\_\_\_

Sickle cell anemia: Yes: \_\_\_\_\_ No: \_\_\_\_\_

Multiple myeloma: Yes: \_\_\_\_\_ No: \_\_\_\_\_

Pheochromocytoma: Yes: \_\_\_\_\_ No: \_\_\_\_\_

Heart disease: Yes: \_\_\_\_\_ No: \_\_\_\_\_

8) Have you eaten in the last four hours? Yes: \_\_\_\_\_ No: \_\_\_\_\_

9) Are you pregnant? Yes: \_\_\_\_\_ No: \_\_\_\_\_ Do not know: \_\_\_\_\_ Date of last period? \_\_\_\_\_

10) Patient Weight \_\_\_\_\_ lb.

11) Have you had a prior MRI exam(s)? Yes \_\_\_\_\_ No \_\_\_\_\_ If Yes, where and date \_\_\_\_\_

**MRI: MR Safety - Please check the appropriate box if you have any of the following:**

|                                                  | YES           | NO |                                 | YES           | NO |
|--------------------------------------------------|---------------|----|---------------------------------|---------------|----|
| Cardiac pacemaker, pacer wires                   |               |    | Renal transplant clips          |               |    |
| EKG leads                                        |               |    | Insulin pump                    |               |    |
| Transdermal medication patches                   |               |    | Transcutaneous nerve stimulator |               |    |
| Implantable cardiac defibrillator (ICD)          |               |    | Biostimulator                   |               |    |
| Intracranial aneurysm clips                      |               |    | Cardiac arrhythmias             |               |    |
| Vascular clips                                   |               |    | Kidney problems                 |               |    |
| History of metal in eyes or metal work, Shrapnel |               |    | Back or neck surgery            |               |    |
| Heart valve prosthesis                           |               |    | Back or neck pain               |               |    |
| Joint or limb prosthesis                         |               |    | Numbness or tingling            |               |    |
| Joint rods, screws; pins, etc.                   |               |    | Hair Wig                        |               |    |
| Middle ear prosthesis                            |               |    | Claustrophobia                  |               |    |
| Eye / Orbital prosthesis                         |               |    | Dentures, retainers or braces   |               |    |
| Hearing aid                                      |               |    | Metal IUD                       |               |    |
| Body Piercing                                    | Date/location |    | Tattoo                          | Date/location |    |

Have you ever had an IV injection of Gadolinium (MRI IV Contrast)? Yes: \_\_\_\_\_ No: \_\_\_\_\_

If yes, did you experience any difficulty with it? (please explain) \_\_\_\_\_  
 \_\_\_\_\_

Technologist signature completing medication reconciliation \_\_\_\_\_ Date \_\_\_\_\_



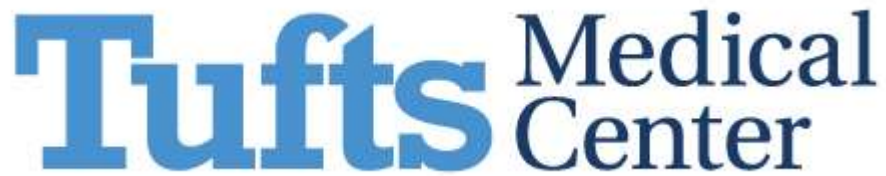

**Protocol Title:** Effect of Intra-Articular Steroids on Structural Progression of Knee OA: A Randomized Controlled Trial

**Protocol Version Date:** April 15, 2014 (Protocol changes)  
May 2, 2012 (Protocol changes)  
February 29, 2012 (Protocol changes)  
August 3, 2011 (Protocol changes)  
April 11, 2011 (Protocol changes)  
February 16, 2011 (DSMB requested changes)  
October 8, 2010 (DSMB requested changes)  
June 29, 2010 (IRB requested changes)  
June 18, 2010 (IRB requested changes)  
April 12, 2010 (Initial)

**Principal Investigator:** Timothy E. McAlindon, MD, MPH  
Chief, Division of Rheumatology  
Tufts Medical Center  
800 Washington Street, Tufts Box 406  
Boston, MA 02111

**NIAMS Grant:** R01 AR057802-01

# STUDY PROTOCOL

## TABLE of CONTENTS

|                                                                                         |           |
|-----------------------------------------------------------------------------------------|-----------|
| <b>ABBREVIATIONS</b> .....                                                              | <b>5</b>  |
| <b>1. SUMMARY</b> .....                                                                 | <b>7</b>  |
| <b>2. BACKGROUND AND SIGNIFICANCE</b> .....                                             | <b>7</b>  |
| <b>2.1 OSTEOARTHRITIS BACKGROUND</b> .....                                              | <b>7</b>  |
| <b>2.2 KNEE OSTEOARTHRITIS AND KNEE SYNOVITIS</b> .....                                 | <b>7</b>  |
| <b>2.3 MECHANISMS OF JOINT DAMAGE FROM SYNOVITIS IN KNEE OSTEOARTHRITIS</b> .....       | <b>8</b>  |
| <b>2.4 IACS: CURRENT CLINICAL USAGE IN THE TREATMENT OF KNEE OSTEOARTHRITIS</b> .....   | <b>9</b>  |
| <b>2.5 EFFECTIVENESS OF IACS FOR KNEE OSTEOARTHRITIS PAIN</b> .....                     | <b>9</b>  |
| <b>2.6 PREVIOUS STUDIES EVALUATING THE EFFECT OF IACS IN CLINICAL SAMPLES</b> .....     | <b>9</b>  |
| <b>2.7 ARE INTRA-ARTICULAR CORTICOSTEROIDS SAFE?</b> .....                              | <b>10</b> |
| <b>2.8 EFFECTS OF INTRA-ARTICULAR CORTICOSTEROIDS ON CARTILAGE</b> .....                | <b>10</b> |
| <b>2.9 EFFECTS OF CORTICOSTEROIDS ON HEALTHY CARTILAGE IN-VITRO</b> .....               | <b>11</b> |
| <b>2.10 EFFECTS OF CORTICOSTEROIDS ON HEALTHY CARTILAGE IN ANIMAL MODELS</b> .....      | <b>11</b> |
| <b>2.11 EFFECTS OF CORTICOSTEROIDS ON DEGENERATIVE CARTILAGE IN ANIMAL MODELS</b> ..... | <b>11</b> |
| <b>2.12 EFFECTS OF CORTICOSTEROIDS ON CARTILAGE DAMAGE IN ANIMAL MODELS</b> .....       | <b>12</b> |
| <b>2.13 INTRA-ARTICULAR CORTICOSTEROIDS AND PERI-ARTICULAR BONE</b> .....               | <b>12</b> |
| <b>2.14 ULTRASONOGRAPHIC SCREENING FOR SYNOVITIS IN OSTEOARTHRITIC KNEES</b> .....      | <b>13</b> |
| <b>2.15 MRI ASSESSMENT OF SYNOVITIS IN OSTEOARTHRITIC KNEES</b> .....                   | <b>14</b> |
| <b>2.16 MRI IN THE ASSESSMENT OF KNEE OA STRUCTURAL PROGRESSION</b> .....               | <b>14</b> |
| <b>2.17 PERI-ARTICULAR TRABECULAR MORPHOMETRY IN KNEE OA USING MRI</b> .....            | <b>15</b> |
| <b>3. STUDY OBJECTIVES</b> .....                                                        | <b>15</b> |
| <b>4. INVESTIGATION SITES</b> .....                                                     | <b>16</b> |
| <b>5. DURATION OF STUDY</b> .....                                                       | <b>16</b> |
| <b>6. STUDY SAMPLE</b> .....                                                            | <b>16</b> |
| <b>6.1 NUMBER OF STUDY PARTICIPANTS</b> .....                                           | <b>16</b> |
| <b>6.2 PRIMARY DIAGNOSIS</b> .....                                                      | <b>16</b> |
| <b>6.3 INCLUSION CRITERIA</b> .....                                                     | <b>16</b> |
| <b>6.4 EXCLUSION CRITERIA</b> .....                                                     | <b>16</b> |
| <b>6.5 SELECTION OF THE STUDY KNEE IN THE EVENT THAT BOTH ARE ELIGIBLE</b> .....        | <b>17</b> |
| <b>7. STUDY INTERVENTION</b> .....                                                      | <b>17</b> |
| <b>7.1 INVESTIGATIONAL PRODUCT</b> .....                                                | <b>17</b> |
| <b>7.2 PLACEBO PRODUCT</b> .....                                                        | <b>17</b> |
| <b>7.3 INVESTIGATIONAL PRODUCT AND PLACEBO STORAGE</b> .....                            | <b>19</b> |
| <b>7.4 INVESTIGATIONAL PRODUCT AND PLACEBO PREPARATION</b> .....                        | <b>19</b> |
| <b>7.5 INVESTIGATIONAL PRODUCT DOSAGE AND ADMINISTRATION</b> .....                      | <b>19</b> |
| <b>7.6 INVESTIGATIONAL MODE OF MEDICAL DEVICE</b> .....                                 | <b>19</b> |
| <b>7.7 DURATION OF TREATMENT</b> .....                                                  | <b>19</b> |
| <b>7.8 WARNINGS AND PRECAUTIONS</b> .....                                               | <b>19</b> |

|            |                                                                         |           |
|------------|-------------------------------------------------------------------------|-----------|
| 7.8.1      | <i>Triamcinolone</i> .....                                              | 19        |
| 7.8.2      | <i>0.9% Sodium Chloride (placebo)</i> .....                             | 20        |
| 7.8.3      | <i>MRIs and Women of Child Bearing Potential</i> .....                  | 20        |
| 7.8.4      | <i>Uncontrolled HIV Infection</i> .....                                 | 20        |
| <b>8.</b>  | <b>PROCEDURES AND MONITORING</b> .....                                  | <b>21</b> |
| <b>8.1</b> | <b>RANDOMIZATION</b> .....                                              | <b>21</b> |
| <b>8.2</b> | <b>GOOD CLINICAL PRACTICE (GCP) AND MONITORING</b> .....                | <b>21</b> |
| <b>8.3</b> | <b>ELECTRONIC DATA CAPTURE</b> .....                                    | <b>21</b> |
| 8.3.1      | <i>Security of the Electronic Data</i> .....                            | 21        |
| 8.3.2      | <i>HIPAA</i> .....                                                      | 22        |
| <b>8.4</b> | <b>CONSENTS</b> .....                                                   | <b>22</b> |
| 8.4.1      | <i>Informed Consent</i> .....                                           | 22        |
| 8.4.2      | <i>Research Authorization Form</i> .....                                | 22        |
| 8.4.3      | <i>E-Mail</i> .....                                                     | 22        |
| 8.4.4      | <i>Photography/Video-Recording</i> .....                                | 23        |
| 8.4.5      | <i>Optional Tissue Banking</i> .....                                    | 23        |
| <b>8.5</b> | <b>OBSERVATIONS AND MEASUREMENTS</b> .....                              | <b>23</b> |
| 8.5.1      | <i>Study Visits</i> .....                                               | 23        |
| 8.5.2      | <i>Blood Pressure Measurements</i> .....                                | 30        |
| 8.5.3      | <i>Knee Exams</i> .....                                                 | 30        |
| 8.5.4      | <i>Laboratory</i> .....                                                 | 30        |
| 8.5.5      | <i>Radiology</i> .....                                                  | 30        |
| 8.5.6      | <i>Knee MRI</i> .....                                                   | 31        |
| 8.5.7      | <i>Knee Ultrasonography</i> .....                                       | 32        |
| 8.5.8      | <i>DXA (Bone Density Testing)</i> .....                                 | 32        |
| 8.5.9      | <i>Physical Function Tests</i> .....                                    | 32        |
| 8.5.10     | <i>Observed Gait Analysis</i> .....                                     | 32        |
| <b>8.6</b> | <b>PARTICIPANT COMPLIANCE</b> .....                                     | <b>33</b> |
| 8.6.1      | <i>Investigational Product</i> .....                                    | 33        |
| 8.6.2      | <i>Study Visits</i> .....                                               | 33        |
| <b>8.7</b> | <b>CONCOMITANT MEDICATIONS</b> .....                                    | <b>33</b> |
| 8.7.1      | <i>Washout Period</i> .....                                             | 33        |
| <b>8.8</b> | <b>UNANTICIPATED PROBLEMS AND ADVERSE EXPERIENCES/EVENTS (AE)</b> ..... | <b>33</b> |
| 8.8.1      | <i>Definitions</i> .....                                                | 33        |
| 8.8.2      | <i>UP and SAE/AE Reporting</i> .....                                    | 35        |
| 8.8.3      | <i>UP/AE/SAE Monitoring</i> .....                                       | 36        |
| <b>8.9</b> | <b>EARLY WITHDRAWAL/TERMINATION OF PARTICIPANTS</b> .....               | <b>36</b> |
| <b>9.</b>  | <b>COMPUTATIONAL ANALYSES</b> .....                                     | <b>37</b> |
| <b>10.</b> | <b>INVESTIGATOR'S REGULATORY OBLIGATIONS</b> .....                      | <b>38</b> |
| 10.1       | <b>INSTITUTIONAL REVIEW BOARD</b> .....                                 | <b>38</b> |
| 10.2       | <b>TUFTS MEDICAL CENTER RHEUMATOLOGY OUTPATIENT CLINIC</b> .....        | <b>38</b> |
| 10.3       | <b>DATA AND SAFETY MONITORING BOARD (DSMB)</b> .....                    | <b>38</b> |
| 10.4       | <b>RECORDS/DATA RETENTION</b> .....                                     | <b>38</b> |
| <b>11.</b> | <b>REFERENCES</b> .....                                                 | <b>39</b> |
|            | <b>APPENDIX A - STUDY TIMELINE</b> .....                                | <b>52</b> |

|                                                                           |           |
|---------------------------------------------------------------------------|-----------|
| <b>APPENDIX B - SCHEDULE OF VISITS .....</b>                              | <b>53</b> |
| <b>APPENDIX C - ACR CRITERIA .....</b>                                    | <b>54</b> |
| <b>APPENDIX D - K/L GRADING SYSTEM .....</b>                              | <b>55</b> |
| <b>APPENDIX E - QUESTIONNAIRES .....</b>                                  | <b>56</b> |
| <b>ALIGNMENT QUESTIONNAIRE .....</b>                                      | <b>57</b> |
| <b>APPENDIX F - BU/CBI MRI SCREENING FORM .....</b>                       | <b>58</b> |
| <b>APPENDIX G - TUFTS MRI SCREENING FORM .....</b>                        | <b>60</b> |
| <b>APPENDIX H - LAB TESTING .....</b>                                     | <b>61</b> |
| <b>APPENDIX I - TUFTS AE/UP REPORTING FORM .....</b>                      | <b>62</b> |
| <b>APPENDIX J – NHLBI JNC 7 BLOOD PRESSURE CLASSIFICATION CHART .....</b> | <b>65</b> |

## *Abbreviations*

|          |                                                                                                                               |
|----------|-------------------------------------------------------------------------------------------------------------------------------|
| aBVF     | apparent bone volume fraction                                                                                                 |
| ACR      | American College of Rheumatology                                                                                              |
| AE       | adverse effects/events                                                                                                        |
| AHA      | American Heart Association                                                                                                    |
| AUC      | area under the curve                                                                                                          |
| BMD      | bone mineral density                                                                                                          |
| BMI      | body mass index                                                                                                               |
| BML      | bone marrow lesion                                                                                                            |
| CAM      | complementary alternative medicine                                                                                            |
| CBI      | Center for Biomedical Imaging at Boston University Medical Campus                                                             |
| CDER     | Center for Drug Evaluation and Research                                                                                       |
| CPPD     | calcium pyrophosphate deposition disease                                                                                      |
| CFR      | Code of Federal Regulations                                                                                                   |
| CRF      | case report form                                                                                                              |
| DAR      | Drug Accountability Record                                                                                                    |
| DSMB     | Data and Safety Monitoring Board                                                                                              |
| DXA/DEXA | dual X-ray absorptiometry                                                                                                     |
| eCRF     | electronic case report form                                                                                                   |
| EDC      | electronic data capture                                                                                                       |
| ET       | early termination                                                                                                             |
| EULAR    | European League Against Rheumatism                                                                                            |
| FDA      | Food and Drug Administration                                                                                                  |
| GCP      | good clinical practice                                                                                                        |
| HAQ      | PROMIS Health Assessment Questionnaire                                                                                        |
| HIPAA    | Health Insurance Portability and Accountability Act                                                                           |
| IA       | intra-articular(ly)                                                                                                           |
| IACS     | intra-articular corticosteroid(s)                                                                                             |
| ICC      | intraclass correlation coefficient                                                                                            |
| ICF      | informed consent form                                                                                                         |
| ICH      | International Committee on Harmonization                                                                                      |
| IP       | investigational product                                                                                                       |
| IRB      | Institutional Review Board                                                                                                    |
| ITT      | intent-to-treat                                                                                                               |
| JSW      | joint space width                                                                                                             |
| JNC 7    | The Seventh Report of the Joint National Committee on Prevention, Detection, Evaluation, and Treatment of High Blood Pressure |
| K/L      | Kellgren and Lawrence                                                                                                         |
| KAI      | KAI Research, Inc.                                                                                                            |
| KOA      | knee osteoarthritis                                                                                                           |
| LOCF     | last observation carried forward                                                                                              |
| MI       | myocardial infarction                                                                                                         |
| MR       | magnetic resonance                                                                                                            |
| MRI      | magnetic resonance imaging                                                                                                    |
| NCI      | National Cancer Institute                                                                                                     |
| NIAMS    | National Institute of Arthritis and Musculoskeletal and Skin Diseases                                                         |
| NIH      | National Institutes of Health                                                                                                 |
| NO       | nitric oxide                                                                                                                  |
| NS       | normal saline                                                                                                                 |

|              |                                                         |
|--------------|---------------------------------------------------------|
| NSAID        | non-steroidal anti-inflammatory drug                    |
| OA           | osteoarthritis                                          |
| OAI          | Osteoarthritis Initiative                               |
| OARSI        | Osteoarthritis Research Society International           |
| OGA          | observational gait analysis                             |
| PA           | posteroanterior                                         |
| paBMD        | tibial periarticular bone mineral density               |
| PHI          | protected health information                            |
| PI           | principal investigator                                  |
| PROMIS       | Patient Reported Outcome Measurement Information System |
| RA           | rheumatoid arthritis                                    |
| RAF          | research authorization form                             |
| RCT          | randomized controlled trial                             |
| SAE          | serious adverse effects/events                          |
| SF-36        | Short Form 36                                           |
| Sub-I        | sub-investigator                                        |
| TIMP         | tissue inhibitor metalloproteinase                      |
| TMC          | Tufts Medical Center                                    |
| TUHS         | Tufts University Health Sciences                        |
| WOMAC® LK3.1 | Western Ontario and McMaster Osteoarthritis Index       |

## 1. Summary

Triamcinolone 40 mg will be compared to placebo in a randomized placebo-controlled clinical trial testing the effect of triamcinolone versus placebo given intra-articularly (into the index knee joint with osteoarthritis (OA)) once every three months over two years for a total of eight knee injections. Tolerability and safety will be assessed by adverse effects (AE) reporting, physical examination, vital signs, and clinical laboratory tests. The primary clinical outcome will be assessed by changes in the WOMAC<sup>®</sup> LK3.1 questionnaire. The primary pathological process measure will be change in knee cartilage volume as measured by magnetic resonance imaging (MRI).

## 2. Background and Significance

### 2.1 OSTEOARTHRITIS BACKGROUND

Symptomatic knee OA has an estimated overall incidence of 240/100,000 person years[1], and is the most frequent cause of dependency in lower limb tasks, especially in the elderly[2]. It causes 68 million work loss days per year and more than 5% of the annual retirement rate[3, 4]. It has considerable economic and societal costs, in terms of work loss[5] and hospital admission[6]. Furthermore, OA is the most frequent reason for joint replacement at a cost to the community of billions of dollars per year[4]. There are currently no therapies for OA confirmed to have an effect on disease progression. Treatments commonly used for OA include intra-articular corticosteroids (IACS), a widely employed invasive intervention that is of particular note because its structural effects on cartilage and bone are uncertain.

### 2.2 KNEE OSTEOARTHRITIS AND KNEE SYNOVITIS

OA is characterized by focal and progressive damage to articular hyaline cartilage accompanied by a hypertrophic 'reaction' in peri-articular bone[7]. The prevailing view of knee OA has been one of a non-inflammatory disorder but chronic inflammatory changes in the synovium are seen in all stages of knee OA[8-12], appear to be of clinical significance[13-16], are associated with regions of cartilage damage[13, 17] and predict structural progression[13]. Inflamed synovium is also the most plausible target for IACS in knee OA[13].

It is likely that synovial inflammation in osteoarthritic knees is triggered and sustained by particles and crystals abraded from damaged cartilage – a "detritic synovitis"[18]. These generate in synovial macrophages and fibroblasts a broad range of inflammatory responses that resemble those found in inflammatory joint disorders such as rheumatoid arthritis. According to this model, synovial inflammation should likely occur as a late consequence of damage to cartilage and subchondral bone. However, it is also possible that it occurs earlier, as a paracrine response to disordered homeostasis in the articular environment[18].

Synovial biopsy studies of osteoarthritic knees have found a high prevalence of inflammation. One study of 63 patients with moderate to severe knee OA found thickening of the lining layer, increased vascularity, and inflammatory cell infiltration in synovial membranes in all knees, with the most prominent features in those with advanced disease[9]. However, synovitis appears common even in mild knee OA - Myers studied the mild end of the spectrum and found synovitis in 55% of biopsied knees[8]. Another biopsy study of nine selected knees with mild OA and short symptom duration also showed a mild chronic synovitis in all cases[12].

Synovial changes in the knee also appear to be associated with pain and structural damage. An MRI study of over 400 individuals from both Veterans Affairs and community sources, found more effusions and synovial thickening among those with knee pain[16]. Among the subset with symptomatic radiographic knee OA, synovial thickening was associated with the severity of knee pain. In a subsequent longitudinal analysis of 270 participants in that study who had MRI evaluations at 15 and 30 months, change in synovitis (especially in the infrapatellar fat pad) correlated with the change in pain ( $r = 0.21$ ,  $p = 0.0003$ )[15]. Loeille et al, in scrutinizing the relationships between synovitis and cartilage

damage among 39 patients with knee OA using arthroscopy, biopsy and MRI, found a correlation of synovitis with medial tibiofemoral cartilage damage ( $r = 0.5$ ,  $p=0.001$ )[17].

There is also evidence that synovitis participates in the structural progression of knee OA[13, 19]. Ayril studied a cohort of 422 individuals with medial compartment tibiofemoral OA who participated in a (null) clinical trial that included a systematic assessment of synovitis and chondropathy using arthroscopy[13]. Twenty-one percent of participants had inflammatory changes in the synovium at baseline and these individuals were three times more likely to exhibit progression of cartilage damage (25.8% vs. 11.9%, adjusted odds ratio = 3.11, 95% confidence limits 1.07 - 5.69). Pelletier et al, in a 2-month observational study of 29 knee OA patients with MRI-confirmed synovitis found that the baseline synovitis score correlated significantly with the percentage loss in cartilage volume over this relatively short period ( $r\sim 0.6$ )[19].

### **2.3 MECHANISMS OF JOINT DAMAGE FROM SYNOVITIS IN KNEE OSTEOARTHRITIS**

The synovium has important roles in articular health, so it is logical to infer that pathological changes and functional compromise may contribute to progression of OA. Two important synovial roles in articular homeostasis include provision of vascular support to distant chondrocytes and facilitation of low-friction movement between cartilaginous surfaces[20]. The synovium produces two critical components of synovial lubrication; (i) the macromolecule hyaluronan, which confers to synovial fluid its viscosity and (ii) the boundary layer lubricant lubricin. In situations of joint injury, the synovium increases its secretion of hyaluronan, which may dampen inflammation in the synovial space. Typical OA effusions are transudative and have high viscosity[20]. However, this viscosity is lost in the presence of inflammation[21]. Experimental data also show reduction in synovial secretion of lubricin in the presence of inflammation and proinflammatory cytokines such as IL-1 and TNF- $\alpha$ [22, 23].

The synovium may also participate in the pathophysiology of OA through the secretion of proteolytic enzymes and cytokines. Indeed, cytokines are fairly abundant in OA synovium, at least in late-stage disease (Table 1)[18]. Immunohistological studies of synovium obtained from OA and rheumatoid (RA) joints show quantitative rather than qualitative differences between the two disorders[9]. Production of IL-1 $\alpha$ , IL-1 $\beta$ , and TNF $\alpha$  is present in synovial membranes from all patients with OA, irrespective of the degree of articular cartilage damage[9]. Thus, chronic inflammatory changes with production of proinflammatory cytokines are a feature of synovial membranes from patients with early OA, with the most severe changes resembling those of RA.

IL-1 and TNF- $\alpha$  are the dominant cytokines in inflamed OA joints, of which IL-1 appears to have the greatest potential to mediate cartilage damage[24, 25]. IL-1 is produced in considerable quantities in OA synovium[26, 27] and appears to be the driving force in the production of destructive enzymes (matrix metalloproteinases) and IL-6[28]. However, there are numerous other cytokines that may have specific and important roles in OA. IL-6, for example, may upregulate matrix metalloproteinase expression in cartilage, stimulate hepatic production of acute phase proteins and mediate bone destruction[18]. The non-peptide mediator, nitric oxide (NO), is also produced by synovial cells and chondrocytes in OA joints[29] and may contribute to cartilage destruction.

There is evidence that IL-1 and TNF- $\alpha$  may be partly responsible for increased amounts of proteases found in OA synovium[18]. Coordinate synthesis of IL-1 and stromelysin has been found in canine OA[30], as has a correlation in human OA synovium between the number of inflammatory cells and levels of neutral proteases[31]. Expression of collagenase and stromelysin is evident in OA synovium, albeit at lower levels than in rheumatoid disease[32, 33]. Tissue inhibitor of metalloproteinase (TIMP) is elevated in OA synovium, with a protease:inhibitor ratio that suggests a role for proteases in tissue destruction. Indeed, many cartilage proteinases have now been identified, among which collagenase 3 (MMP-13) and aggrecanase-1 (ADAMTS4) appear to play major roles in degradation of human cartilage matrix[20]. Activation of collagenase 3 (MMP-13) appears to be at least partly cytokine dependent[34, 35], but there is a lack of agreement on the effect of cytokines on ADAMTS4[20].



Of course, the factors that are pivotal to maintaining this balance or the cartilage response are largely unknown. It follows, then, that perturbation of the system using pharmaceuticals may have effects on the balance between catabolism and anabolism that are not entirely predictable. It is suggested, for example, that intra-articular corticosteroids (IACS) might benefit OA knees by suppressing IL-1 mediated stimulation of metalloproteinase synthesis[36]. While this seems plausible, the net effects of IACS on measures of cartilage health need to be tested in a clinical environment.

#### **2.4 IACS: CURRENT CLINICAL USAGE IN THE TREATMENT OF KNEE OSTEOARTHRITIS**

IACS are widely employed in the management of knee OA. It is estimated that 95% of rheumatologists in the U.S. perform IACS for OA, 53% frequently[37]. The use of IACS for OA is endorsed by the American College of Rheumatology (ACR)[38], the European League Against Rheumatism (EULAR)[39], the Osteoarthritis Research Society International (OARSI)[40, 41], and the National Collaborating Centre for Chronic Conditions[42]. The latter was a thoughtful document and commented "...intra-articular corticosteroid injections provide short-term reduction in osteoarthritis pain... The risks ... are generally small. The question of steroid-arthropathy, ... remains controversial and is currently based on animal model and retrospective human studies."

#### **2.5 EFFECTIVENESS OF IACS FOR KNEE OSTEOARTHRITIS PAIN**

There have been at least 12 randomized controlled trials (RCTs) testing IACS for OA *pain*[43-55], and two recent meta-analyses[56, 57]. The most recent and comprehensive meta-analysis[57] was based on 28 short-duration trials (except one[51]). In the pooled analyses, IACS was more effective than placebo for pain reduction one-week post injection (relative risk 1.4; 95% confidence limits 1.1 - 1.8), 2 weeks (1.8; 1.1 - 3.0) and 3 weeks (3.1, 1.6 - 6.1). They recommended that future trials have standardized outcomes, run longer, investigate different patient subgroups, and clinical predictors of response, specifically those associated with inflammation and structural damage. The proposed study will accommodate these recommendations by testing a long-term (2-year) IACS intervention among the subset of knee osteoarthritis (KOA) with inflammatory features, using standardized clinical and structural outcomes.

#### **2.6 PREVIOUS STUDIES EVALUATING THE EFFECT OF IACS IN CLINICAL SAMPLES**

Three studies have attempted to examine the structural effects of IACS on OA progression[51, 58, 59]. The first was an observational report of 61 patients with knee OA who had documentation of IACS treatment over a 10-year period[59]. In men only, the knees that had received IACS had more severe osteoarthritis at follow-up, as measured by the tibiofemoral angle of alignment. However, this study has serious methodologic problems including bidirectional censorship and confounding by indication.

The second was an observational study of 67 patients with temporomandibular joint OA that had not responded to non-surgical treatment[58]. Twenty-three proceeded immediately to high condylectomy, while the remaining 44 received two intra-articular injections of triamcinolone acetonide, 20 mg, with a 2-month interval. It is not clear how this treatment assignment was made. Eighteen of the 44 patients who received IACS later underwent high condylectomy due to 'treatment failure'. Histological examination of the surgical specimens from this subset exhibited more extensive joint damage than those in the non-steroid group. However, the observational non-randomized nature of this study introduces complexities that prevent causal inference.

Raynauld evaluated the safety of triamcinolone acetonide 40mg, or saline control, administered every 3 months for 2 years in a randomized controlled trial for knee OA[51]. Structural progression was assessed using fluoroscopically-positioned knee x-rays[60, 61]. They enrolled 68 participants, of whom 66 completed the trial. Most had mild OA (~65% had Kellgren & Lawrence grade 2 changes). There was no difference between groups in extent of change in radiographic joint space width. The clinical outcomes were also identical, with the exception of area-under-the-curve (AUC) analyses for night pain and stiffness that favored treated knees (AUC for night pain; treated =-0.7; untreated =-0.3; p = 0.005; stiffness; treated =-0.7; untreated =-0.3; p = 0.05). This study is somewhat reassuring in that it provides

evidence for symptomatic benefit without evidence of increased structural deterioration. On the other hand, there are methodologic factors that limit its interpretation. The participants had mild disease and exhibited little structural progression. In fact, there was no attempt to enroll a phenotype at higher risk for progression nor was there evaluation or stratification for indicators of inflammatory OA that might predicate responsiveness to IACS. Thus, the findings are not especially informative in respect of the potential for structural modification in the pertinent phenotypes. The radiograph is also fundamentally flawed due to its inability to image soft-tissue articular structures such as cartilage, and high precision error relative to expected change, especially in a small sample such as this[62].

## **2.7 ARE INTRA-ARTICULAR CORTICOSTEROIDS SAFE?**

Joint sepsis is a primary concern in relation to intra-articular injection. However, while its rate of occurrence is difficult to measure with certainty, it is clearly low. A 1999 estimate from a retrospective survey in France suggests a rate of 13 infections per million injections, lower with pre-packaged syringes[63]. Concordant with this low estimate, a survey of all cases of septic arthritis incident between 1982 to 1991 in Nottingham, UK (which had a base population of 600,000) identified only 3 cases attributable to IACS[64].

More frequent, but of less medical concern, are local aseptic inflammatory reactions to IACS injections[65]. These have been reported with rates up to 24% in some series[45-47, 66]. The biologic basis for these reactions is uncertain but may relate to the crystalline nature of the injected corticosteroid formulations.

There is systemic absorption of steroid injected into a joint. Peak plasma levels after an intra-articular injection of 80 mg methyl prednisolone are in the order of 169 ng/ml, achieved 8 hours post injection[67]. A measurable transient effect on the pituitary axis is apparent with injections of 40 mg of methyl prednisolone[68] or >40 mg triamcinolone diacetate[69]. However, it seems unlikely that this has any long term effects at the frequency generally recommended in rheumatology practice (< 3 months). Problems with the pituitary axis were also apparently not encountered in an RCT in which IACS were administered every 3 months over a 24 month period[51]. While links have been made between IACS and various systemic features (immunosuppression[70], impaired diabetes control[71, 72], flushing, menstrual irregularities[73]) substantial data quantifying their frequency is generally lacking[56, 74]. One study provided data showing elevation in blood pressure and blood glucose levels following epidural corticosteroid injections, but the doses used were greater than those proposed in this study[71]. Anaphylaxis after IACS has been rarely reported[75, 76], as has steroid psychosis[77].

The most systematic evaluation of adverse effects from IACS was performed by Bellamy, in a Cochrane review of their efficacy for OA[57]. He found that side effects were uncommon and noted no reports of *serious* adverse events among the trials reviewed. Reported adverse events included post-injection flare, crystal-induced synovitis, tissue atrophy, fat necrosis, calcification, joint sepsis, steroid arthropathy, avascular necrosis, hematoma, fluid retention, hyperglycemia and hypertension.

Raynauld's RCT of IACS is pertinent to this proposal in that it employed a similar intervention dosage and time frame<sup>1</sup>. In that study, "No infections (local or systemic) or acute flares were associated with the injections during the study. Findings of laboratory tests performed during the study were within normal limits, and there were no differences between the treatment groups."

## **2.8 EFFECTS OF INTRA-ARTICULAR CORTICOSTEROIDS ON CARTILAGE**

A number of case studies emerged in the 1950s and 1960s that suggested a link between IACS injections and joint destruction (cited by Salter[78], Mankin[79]). Chandler and Wright, for example, observed that repeated intra-articular injection of hydrocortisone in patients with rheumatoid arthritis seemed to improve the extent of synovitis but increase the rate of radiological deterioration[80]. Chandler et al subsequently drew an analogy with a Charcot joint in a description of apparent acceleration of progression of hip OA in a doctor's wife who had received frequent IACS injections[81]. Similar

inferences based on clinical observations recur even in recent literature[59]. While such inferences are innately confounded by indication, their validity seemed to be substantiated by early studies in animals that showed anti-anabolic effects of IACS on cartilage[79, 82, 83].

## **2.9 EFFECTS OF CORTICOSTEROIDS ON HEALTHY CARTILAGE IN-VITRO**

There is evidence that corticosteroids have anti-anabolic influences on cartilage metabolism in-vitro[84-86]. Farquhar tested for interactions between corticosteroid exposure and joint loading on cartilage metabolism and observed that high dose steroids depressed protein and proteoglycan synthesis[84]. Heavy loading further exacerbated the loss of matrix solids. Murphy et al, in pursuit of the optimal therapeutic concentration of IACS, found that proteoglycan synthesis in normal cultured equine articular cartilage was severely depressed by the presence of methylprednisolone 10 mg/mL, and failed to recover after 13 days of culture without methylprednisolone[86]. Cartilage treated with concentrations in the range of 5 mg/mL also exhibited adverse metabolic responses, but these tended to recover after methylprednisolone removal. Lower concentrations did not have significant effects. More recently, Fubini scrutinized corticosteroid-induced changes in collagen expression at transcriptional and translational levels in articular cartilage from young adult horses[85]. Steady-state levels of type II procollagen mRNA decreased as methylprednisolone concentrations increased in a dose-dependent fashion, dropping below 10% of control values by a concentration of  $1 \times 10^5$  pg/ml. Cytotoxicity occurred as methylprednisolone levels were increased beyond  $1 \times 10^8$  pg/ml. Based on a comparison of their data with information on the pharmacokinetics of intra-articular methylprednisolone in clinical practice, they estimated that synovial fluid methylprednisolone may remain above a cytotoxic concentration for more than 36 hours following a typical clinical IACS injection. Pelletier et al found that hydrocortisone reduced proteoglycan catabolism in cartilage explants (which they attributed to suppression of metalloprotease synthesis) but also proteoglycan synthesis. They observed extensive vesicular dilatation of chondrocyte endoplasmic reticulum in explants treated with hydrocortisone[87].

## **2.10 EFFECTS OF CORTICOSTEROIDS ON HEALTHY CARTILAGE IN ANIMAL MODELS**

In-vivo studies of the effects of corticosteroids on healthy cartilage tend to show adverse effects, although their findings are not always consistent. Moskowitz in 1970, and Behrens in 1975, separately observed deleterious effects of intra-articular triamcinolone acetonide on rabbit cartilage[88, 89]. These included nuclear degeneration, cyst formation, cartilage fissures, and reduced synthesis of proteoglycans and matrix proteins. Lewandowski induced 'OA-like damage' in rats using repeated intramuscular injections of dexamethasone[90]. Catabolic or anti-anabolic effects of IACS have also been seen in studies of horses[82] and rabbits[91]. One study testing interactions of intra-articular hydrocortisone and running on cartilage in rats found that the combination was more detrimental than either intervention alone[92]. Studies testing cartilage effects of intra-articular methylprednisolone acetate on the healing of osteochondral defects in horse joints had somewhat discordant results. Shoemaker found degenerative effects[93] but Foland did not observe significant changes[94]. Of course, the extent to which effects in animal models can be generalized to human situation is uncertain.

## **2.11 EFFECTS OF CORTICOSTEROIDS ON DEGENERATIVE CARTILAGE IN ANIMAL MODELS**

In contrast to the prior scenarios, these studies provide evidence that IACS may reduce cartilage degradation in certain pathophysiologic situations. Williams & Brandt tested the effect of intra-articular triamcinolone hexacetonide on the development of degenerative cartilage changes that follows a single intra-articular injection of sodium iodoacetate (a metabolic poison)[95]. These features include cartilage fibrillation, loss of staining with Safranin O, depletion of chondrocytes, and prominent osteophytes, without evidence of synovitis. However, when triamcinolone hexacetonide was injected into the ipsilateral knee 24 hours after the intra-articular injection of iodoacetate, fibrillation was noted in only 1 of 6 samples, osteophytes were less prominent, pericellular staining with Safranin O persisted, and cell loss was less extensive. Thus, triamcinolone hexacetonide produced a marked, dose-dependent protective effect in this model of chemically-induced articular cartilage damage.

Corticosteroids also apparently reduce progression of degenerative lesions in the cruciate ligament transaction dog model of OA[96, 97]. Pelletier & Martel-Pelletier treated 6 animals with oral prednisone and 6 with intra-articular triamcinolone hexacetonide at surgery and 4 weeks later[96]. Twelve other operated dogs received no treatment. Four of 15 normal control dogs received intra-articular triamcinolone. All dogs were sacrificed 8 weeks post-surgery. Operated untreated dogs developed significant cartilage lesions on the femoral condyles and tibial plateaus with prominent osteophytes. Operated dogs treated with oral or intra-articular steroids developed significantly less osteophytosis. Cartilage erosions on femoral condyles appeared in 25% of the untreated dogs, 8% of the dogs receiving oral prednisone, and none of the dogs receiving intra-articular triamcinolone. In both groups of treated dogs, the size of the tibial plateau lesions was significantly smaller than in the operated untreated dogs. Histologically, corticosteroids also significantly reduced the severity of cartilage structural degeneration. Electron microscopy revealed no increase in cell degeneration or death associated with steroids.

The same research group later performed a similar experiment testing the effect of intra-articular methylprednisolone acetate on the development of osteoarthritic lesions in the dog model of OA[97]. Treatment with methylprednisolone reduced the incidence and size of osteophytes and the histologic severity of cartilage damage. Immunohistochemistry of the OA cartilage revealed a marked increase in staining for stromelysin in chondrocytes and throughout the matrix. Treatment with methylprednisolone reduced this toward normal in both chondrocytes and matrix.

In a subsequent mechanistic study using the same animal model, Pelletier et al examined the effects of triamcinolone hexacetonide on cartilage metalloproteases and expression of cytokines/oncogenes (IL-1 beta, c-Fos, and c-Myc)[98]. This 30-dog study had 4 groups: (1) no treatment; (2) triamcinolone at time of surgery and at 4 and 8 weeks later; (3) triamcinolone at 4 and 8 weeks after surgery; (4) triamcinolone at 8 weeks after surgery. As before, intra-articular injections of triamcinolone reduced the development of osteophytes and the histologic severity of cartilage lesions. Immunohistochemistry revealed that triamcinolone reduced the percentage of chondrocytes immunoreactive for stromelysin in a dose-response fashion. They inferred that the effect of triamcinolone may be mediated through a reduction in the expression of proteolytic enzymes, such as stromelysin.

## **2.12 EFFECTS OF CORTICOSTEROIDS ON CARTILAGE DAMAGE IN ANIMAL MODELS**

The potential for corticosteroids to attenuate cartilage damage resulting from inflammatory milieu appears more clear-cut. Corticosteroids have diverse anti-inflammatory effects that could lead to a reduction in activity of downstream catabolic pathways[99, 100]. In inflammatory arthritis models, corticosteroids reduce proteoglycan breakdown, suggesting an inhibitory effect on enzymatic degradation of cartilage[101-103]. Sedgwick et al found evidence that suppression of synovial expression of inflammatory mediators is a critical mediator of this effect[102]. Using an in-vivo inflammatory model of cartilage destruction, they observed that (soluble) hydrocortisone sodium succinate reduced while (insoluble) hydrocortisone acetate enhanced proteoglycan loss[102]. Injection of the same dose of hydrocortisone acetate into the inflamed lining tissue reversed this effect. However, these results are also compatible with the possibility that corticosteroids formulated to provide persistent intra-articular concentrations have catabolic effects on cartilage.

Joosten et al compared rimexolone and triamcinolone hexacetonide injected into joints of mice with monoarticular antigen-induced arthritis[104]. In control joints, both drugs suppressed proteoglycan synthesis. However, in the inflamed joints, they counteracted the usual severe suppression of proteoglycan synthesis, and reduced the extent of osteophyte formation (a characteristic of this type of experimental arthritis). Thus, in the presence of overt inflammation, the overall effect of corticosteroids on cartilage appears to be favorable.

## **2.13 INTRA-ARTICULAR CORTICOSTEROIDS AND PERI-ARTICULAR BONE**

Peri-articular bone has an important role in protecting cartilage from injury. It is estimated that 30-50% of a load across a knee is absorbed by peri-articular bone compared to only 1-3% by articular cartilage[105-

108]. In OA there are widespread pathologic changes in peri-articular bone that include thickening and remodeling of the subchondral plate[109], increased bone turnover[110], trabecular microstructural abnormalities<sup>[111],[112],[113]</sup> and macroscopic damage[114]. All of these impair the biomechanical properties of peri-articular bone and could contribute to structural progression. Clinical observations bear this out: peri-articular scintigraphic abnormalities and bone marrow lesions (both common in OA) predict radiographic progression[115] and correlate with subsequent joint space loss ( $r \sim 0.2 - 0.3$ ,  $p < 0.05$ )[116]-[117, 118] while systemic bone density and tibial peri-articular bone mineral density (BMD) are highly predictive of structural progression of knee OA[119]- [119, 120][121]. Bruyere found a correlation between subchondral BMD and 1-year change in radiographic joint space width of 0.43, highlighting the large effect of bone health on cartilage loss[121]. Zhang et al, examined the relationship of femoral neck BMD with progression of radiographic knee OA among 473 women over 8 years[119]. Compared to those in the lowest quarter of BMD, the adjusted odds ratios for progression were 0.3, 0.2, and 0.1 among women in the 2nd, 3rd, and highest BMD quarters ( $p$  for trend = 0.04).

Glucocorticoids have effects on bone metabolism that include suppression of osteoblast proliferation and reduced protein synthesis[122]. The reduction in protein synthesis by osteoblasts is probably mediated by direct glucocorticoid receptor regulation of important osteoblast genes. This results in loss of bone mass at trabecular sites and a propensity for fracture. Surprisingly, we have not found any previous studies addressing how these biological effects might interact with processes in osteoarthritic peri-articular bone. It may be reassuring that studies of IACS for knee OA, including a 2-year intervention[51], make no note of any adverse effect on bone health[57]. Nevertheless, the biologic effects of corticosteroids on bone, together with epidemiologic observations on the relationships of bone density with progression of OA, indicate that effects of IACS on bone health need to be evaluated. This proposed study will incorporate measures of peri-articular and distant bone mineral density using dual x-ray absorptiometry (DXA), and trabecular morphometry using MRI.

#### **2.14 ULTRASONOGRAPHIC SCREENING FOR SYNOVITIS IN OSTEOARTHRITIC KNEES**

Clinical and radiological characteristics are poor predictors of inflammation in knee OA[123]: Ultrasonography and MRI both have the capability to demonstrate synovial changes[124-126]. Of these two modalities, ultrasonography has greater clinical utility as a screening tool because of portability, lower cost and increasing deployment in rheumatology practice. These factors make it a more desirable technology than MRI to evaluate knee OA synovitis in a clinical setting, especially since the probable outcome of the proposed trial is a therapeutic strategy (IACS) that is contingent on screening for the presence of knee joint synovitis.

In general, musculoskeletal ultrasonography has high sensitivity and specificity in the detection of joint inflammation[127, 128], and is sensitive to change induced by therapeutic interventions[129-131]. Ultrasound may be slightly less predictive than MRI in the detection of synovial thickening[132]. One study compared B-mode and power Doppler ultrasound to *contrast-enhanced* MRI -effusion or synovial thickening was detected by B-mode ultrasound in 58%, power Doppler in 63% and contrast-enhanced MRI in 82%[133]. Using MRI as the reference standard there was a sensitivity of 72% for effusion in the superior recess and 81% for effusion in the lateral recess. There have been a couple of pathological validation studies of ultrasonographically-detected synovitis. The first showed that power Doppler sonography can reliably measure the extent of vascularity in the synovium of knee joints, with correlations between power Doppler and pathological grading of vascularity of  $\sim 0.8$ [134]. Another compared ultrasound assessments of synovitis (classified according to the intensity of the power Doppler signal) against histopathology in 3 OA and 7 rheumatoid knees[135]. The power Doppler ultrasound synovitis score correlated with synovial tissue cell infiltrate ( $r \sim 0.6$ ), synovial lining layer thickness ( $r \sim 0.6$ ), and vascularity ( $r \sim 0.6$ ).

The primary role of the ultrasonography assessment is to enrich the sample with participants who have synovitis using a technology that can be easily deployed in clinical practice; a role for which its performance characteristics are sufficient.

### **2.15 MRI ASSESSMENT OF SYNOVITIS IN OSTEOARTHROTIC KNEES**

There is currently no clear consensus on the optimal MRI approach for assessment of synovitis in clinical studies[136-138]. While non-enhanced MRI has been used in epidemiologic and clinical studies to classify synovitis in osteoarthrotic knees[12, 15-17, 132, 139-141], this was generally confined to measurement of signal intensity in Hoffa's fat pad. Histological validation of this approach appears to be limited to only two cases in a series of nine patients[12, 17]. Although the performance of this approach may be adequate for large-scale studies, it is uncertain that it is suitable for following synovitis in a clinical trial.

Other studies indicate that *gadolinium-enhanced* MRI offers greater specificity in the detection of synovitis[17, 142], and there seems to be a greater enthusiasm for use of this technique[136-138]. However, a number of factors militate against its use in the proposed study. Firstly, intravenous gadolinium confers a risk of severe complications[143] that may be unacceptable in the context of a OA research study. Secondly, contrast enhancement appears to diminish sensitivity to change of cartilage volume measures[144], the primary structural outcome in this study. Thirdly, the procedure carries substantial participant and staff burden and adds to the cost of the endeavor. While the opportunity will exist to score our MRIs for synovitis, especially if clarity emerges about how best to use non-enhanced images for this purpose, we will not view this as a primary measure of this covariate.

### **2.16 MRI IN THE ASSESSMENT OF KNEE OA STRUCTURAL PROGRESSION**

Radiographs have been widely used to measure the severity of knee OA but their ability to provide precise, reproducible and valid measurement of the structures of interest (cartilage, synovium, bone) is limited. MR, on the other hand can image soft-tissue structures, provide insight into the tissue characteristics, and indicate the state of subchondral trabecular bone[145]. Recent MRI studies of knee OA have revealed wide-ranging damage to soft-tissue structures[146, 147], and have revealed pathologies such as bone marrow lesions and synovitis[15]. A particular appeal of MR is the inherent digital acquisition permits quantification of signal intensities from discrete structures, generation of 3D representations of individual anatomic structures, and computation of their volumes.

An OMERACT-OARSI workshop on imaging technologies published a comprehensive review of the MRI data on (1) pulse sequences for morphological analysis of articular cartilage (2) techniques for segmenting cartilage (3) semi-quantitative scoring of cartilage status and (4) technical validity, precision and sensitivity to change of quantitative measures of cartilage morphology[148]. Among their conclusions was that quantitative assessment of cartilage morphology using fat-suppressed gradient echo sequences and appropriate image analysis techniques, displays high accuracy and adequate precision (e.g., root-mean-square standard deviation medial tibia=61  $\mu\text{m}^3$ ) for longitudinal studies in OA patients. Longitudinal studies show changes in cartilage volume of the order of -4% to -6% occur per annum in OA in most knee compartments (e.g., -90  $\mu\text{m}^3$  in medial tibia). Annual changes in cartilage volume exceed the precision errors and appear to be associated with clinical symptoms as well as with time to knee arthroplasty.

Cartilage volume and thickness measurements have been validated in at least nine studies using cadaveric knees or patient specimens from arthroplasty[149-156]. Most of these document a close linear relationship between the two measures with differences in the interval of 5 – 10%. MRI cartilage volume and thickness measurements obtained prior to arthroplasty have been validated against actual cartilage volume from the resected specimen[157]. Cartilage volume assessments were lower using MRI (interval 7-27%) but there was a high correlation between the two measures ( $r=0.98$ , standard error 7%). This study provides estimates of absolute cartilage volume loss, e.g. mean medial tibia cartilage loss in patients with medial compartment OA was 1290  $\text{mm}^3$  [157].

The reproducibility of cartilage volume measurements appears to be excellent[148]. Raynauld et al demonstrated inter-reader ICCs of 0.986-0.995 for total cartilage volume, and intra-reader intraclass correlation coefficient (ICC) of 0.99[158]. We have also examined the reproducibility of *longitudinal* measurement of cartilage volume loss over a 2-year period and demonstrated intra-reader ICCs of ~0.93.

MRI assessments of OA severity appear clinically relevant and have discriminative validity. Comparison of cartilage volume measured by MRI with severity of radiographic joint space narrowing showed a mean reduction in tibial cartilage volume of 1.00 ml (s.d. 0.32) in the medial compartment and 0.53 ml (s.d. 0.25) in the lateral compartment each increment in joint space narrowing score[159]. Estrogen-users were found to have more cartilage than non-users (adjusted difference = 0.30 ml, 95% confidence interval 0.08 - 0.52)[160]. MRI can detect in-vivo deformation of patellar cartilage shortly after joint loading[161], diurnal variation in cartilage thickness[162], and is more sensitive in assessment of OA progression than radiography and arthroscopy[117]. Cartilage volume loss also predicts symptoms[163] and arthroplasty[164].

Currently there are at least thirteen publications describing the measurement characteristics of this approach among clinical cohorts with knee OA followed for periods up to three years[165-174]. With one exception[170], these show progressive cartilage volume loss with a mean value in the tibia, or medial tibia, of ~5%, s.d. of ~5%, interval between 3.8 – 7.4%. One study detected cartilage volume loss in the absence of change in joint space width, confirming that MRI has greater sensitivity to change than radiography[169].

A number of semi-quantitative scoring methods for whole-organ OA and cartilage status have been developed[175-179]. These have shown adequate reliability, specificity and sensitivity, and ability to detect lesion progression over 1-2 years[148]. Intra-class correlation coefficients for components of these scales are in the interval 0.59 – 0.92, with the most reliable assessments produced for osteophytosis (0.91)[175, 177].

## **2.17 PERI-ARTICULAR TRABECULAR MORPHOMETRY IN KNEE OA USING MRI**

The importance of trabecular micro-architecture as a determinant of bone strength prompted a number of investigators to develop and validate an approach to measurement of trabecular parameters using MRI[145, 180-182]. MRI trabecular morphometry has been validated against trabecular bone using vertebral, femoral, and calcaneal specimens as a gold standard[183-185], and against bone mechanical properties[185]. MR trabecular parameters are reproducible[145], correlate closely with those derived from optical images of the bone specimens[184], and can discriminate between postmenopausal osteoporotic and non-osteoporotic women[186]. MRI trabecular morphometry has been evaluated in clinical studies of knee OA[145], and we are currently deploying it in the Osteoarthritis Initiative (OAI)[187] (see Section C.6). As an indication of its *discriminative validity*, the apparent trabecular bone volume fraction and apparent trabecular spacing differs between OA and non-OA knees, varies within knees reflecting the localization of OA[145], relates to articular cartilage degeneration[181], and correlates with subchondral BMD.

## **3. Study Objectives**

This study is a two-year stratified and block-randomized double-blind, placebo controlled clinical trial of the effect of intra-articular triamcinolone 40 mg injectable suspension, administered every 3 months over two years (for a total of 8 doses). The randomization will be stratified by the baseline radiographic severity of knee OA (Kellgren and Lawrence grade of 2 or 3) and gender. An interim analysis will be conducted after the first half of participants has completed the trial. This interim analysis will allow the trial to be stopped early for either success or futility, or allow the trial to continue if neither success nor futility has been established.

The primary structural outcome objective in this study is cartilage volume loss; secondary structural outcomes include peri-articular bone marrow lesions (BML), attrition, tibial peri-articular bone density ratio (paBMD), and apparent bone volume fraction (aBVF). The primary clinical outcome objective is the pain domain of the WOMAC® LK3.1; secondary clinical outcomes include WOMAC® LK3.1 stiffness and function scores, physical function tests and healthcare utilization (medication use, physician visits for knee OA, and arthroplasty).

#### *4. Investigation Sites*

This study will be a single site study performed at Tufts Medical Center.

#### *5. Duration of Study*

The entire study will run over five years (a study timeline can be found in Appendix A). For each study participant, participation is 26 months. **In this study a month is defined as 28 days.**

#### *6. Study Sample*

##### **6.1 NUMBER OF STUDY PARTICIPANTS**

The number of study participants to be randomized for this study is 140. Randomized participants who withdraw study participation or who are prematurely terminated will not be replaced.

##### **6.2 PRIMARY DIAGNOSIS**

Study participants will have a diagnosis of knee OA, defined as a) chronic knee discomfort, b) tibiofemoral or patellofemoral OA by radiograph, and c) clinical exam confirming pain/discomfort referable to the knee joint. If all criteria are satisfied, the participant will automatically meet American College of Rheumatology criteria for osteoarthritis of the knee.

##### **6.3 INCLUSION CRITERIA**

- Age  $\geq$  45 years
- Chronic knee discomfort based on affirmative response to the question “During the past 12 months, have you had any pain, aching, or stiffness in or around your knee(s) on most days for at least one month?”
- Screening WOMAC® LK3.1 pain subscale score  $\geq$ 2 on at least one of the WOMAC® LK3.1 weight-bearing pain questions and total weight-bearing pain score  $\leq$  8
- Tibiofemoral or patellofemoral OA on posteroanterior weight-bearing semi-flexed or lateral knee radiographs with severity equivalent to Kellgren and Lawrence (K/L) grade 2 or 3
- Evidence of synovitis on ultrasound at screening
- Clinical examination confirming knee pain or discomfort referable to the knee joint
- Prepared to discontinue NSAID(s)/analgesic(s) for 2 days (i.e., 48 hours) prior to each assessment (visit)

##### **6.4 EXCLUSION CRITERIA**

- Prior septic (study) knee joint
- Prior reconstructive surgery in the study knee
- Prior or present osteonecrosis (avascular necrosis of the index knee )
- Chronic use of oral corticosteroids; knee intra-articular corticosteroid injection within 3 months of Baseline (Month 0) visit
- Knee injection of hyaluronic acid within 6 months of Baseline (Month 0) visit
- Ongoing use of doxycycline, indomethacin, glucosamine and/or chondroitin; or use of these within 2 months of Screening visit
- Evidence (e.g., on ultrasound or by history) of other inflammatory joint disease (e.g., gout, CPPD)



- Serious medical conditions or impairments that, in the view of the investigator, would obstruct participation in the trial such as uncontrolled HIV infection, uncontrolled diabetes, uncontrolled hypertension, opiate dependency
- Plan to permanently relocate from the region, or take an extended vacation for greater than 3 months during the trial period
- Planned arthroscopy and/or arthroplasty in the study knee
- Any contra-indication to having an MRI (including weight >350 lbs)
- Inability to speak or comprehend English

### **6.5 SELECTION OF THE STUDY KNEE IN THE EVENT THAT BOTH ARE ELIGIBLE**

- If both knees are eligible, then the more symptomatic knee will be selected (greater WOMAC<sup>®</sup> LK3.1 pain subscale score).
- If both knees have equivalent WOMAC<sup>®</sup> LK3.1 pain subscale scores, the knee with a greater K/L grade will be chosen.
- Finally, if both the WOMAC<sup>®</sup> LK3.1 pain subscales scores and K/L grades are equivalent for both knees, the study knee will be randomly assigned.

## *7. Study Intervention*

### **7.1 INVESTIGATIONAL PRODUCT**

Triamcinolone Acetonide (i.e., Kenalog-40mg/mL for injection)

Active Ingredient: Triamcinolone Acetonide - 40 mg/mL

Excipients: Benzyl Alcohol - 0.9%; Carboxymethylcellulose Sodium - 0.75%; Polysorbate 80 - 0.04%; may contain Sodium Hydroxide to adjust ph; may contain Hydrochloric Acid to adjust ph; Sodium Chloride

pH: 5.0-7.5

Form: Injection suspension

Manufacturer: Bristol-Myers Squibb

P.O. Box 4500

Princeton, NJ 08543-4500

Business hours: [www.bms.com](http://www.bms.com) (web site)

Business hours: phone (800) 321-1335 (drug information)

Business hours: fax (609) 897 6663

Product ID: 2150509

AAPCC Code: 132000-Corticosteroids

### **7.2 PLACEBO PRODUCT**

0.9% Sodium Chloride Injection (sterile, nonpyrogenic, isotonic solution of sodium chloride and water for injection)

Active Ingredient: Sodium chloride 9mg/mL

Excipients: The solution may contain hydrochloric acid or sodium hydroxide for pH adjustment.

Sodium Chloride, USP is chemically designated NaCl, a white crystalline compound freely soluble in water.

How supplied: 0.9% Sodium Chloride Inj. Single-dose Fliptop Vial 10 mL that contains no bacteriostat or antimicrobial agent or added buffer. Sodium Chloride, USP is chemically designated NaCl, a white crystalline compound freely soluble in water.

mOsmol (calc): 0.308/mL

pH: 5.3 (4.5 to 7.0)

Storage requirement: 20 to 25°C (68 to 77°F). [See USP Controlled Room Temperature].

Supplier: Hosperia, Inc., Lake Forest, IL 60045 USA  
List Number: 4888

### **7.3 INVESTIGATIONAL PRODUCT AND PLACEBO STORAGE**

Both the investigational product (IP) and placebo will be stored in the Research Pharmacy at Tufts Medical Center according to manufacturer storage instructions. Intra-articular injections of IP and placebo will be prepared by the research pharmacy and will be blinded to the research team members. No one involved with screening procedures will be able to seek or anticipate treatment allocation.

### **7.4 INVESTIGATIONAL PRODUCT AND PLACEBO PREPARATION**

Syringes will be pre-filled by the research pharmacist with triamcinolone acetonide or saline according to the randomization code kept in the research pharmacy. The syringe contents will be masked by the research pharmacist prior to transportation using opaque labels and an opacified three-way stopcock. A 0.2 ml airlock will ensure that no contents are visible in the syringe tip. The needle will be affixed with the stopcock in a vertical orientation so that the airlock migrates upwards to the plunger and ensures full delivery of the medication.

### **7.5 INVESTIGATIONAL PRODUCT DOSAGE AND ADMINISTRATION**

Participants will receive either triamcinolone acetonide 40 mg/mL or matching 0.9% normal placebo 1mL intra-articularly (IA) to the index knee every 12 weeks for a total of 8 doses.

IA injections will be performed by a rheumatologist with ultrasound guidance for needle placement. After introduction of the needle into the joint cavity the ultrasound machine will be switched off so that the medication flowing into the joint is not identifiable on the screen, thus maintaining the study allocation concealment and blinding of study personnel.

Subjects will have the option of having local anesthetic (Gebauer's Pain Ease:1,1,1,3,3-Pentafluoropropane and 1,1,1,2-Tetrafluoroethane) and / or Lidocaine Hydrochloride 1% percutaneously as clinically indicated. These agents will be administered by the injecting physician. No anesthetic will be placed intra-articularly.

### **7.6 INVESTIGATIONAL MODE OF MEDICAL DEVICE**

Although this study is not investigating the safety or effectiveness of any medical device, and although the GE Lunar Prodigy Advance medical device ("Prodigy") is cleared by the FDA, some parts of the study will entail use of software known as Knee Software as a secondary measurement tool. When the Knee Software is enabled on the Prodigy, technically the Prodigy is an investigational device. When the Knee Software is not enabled, the Prodigy is no longer an investigational device. When the Knee Software is enabled, a warning will appear that the Knee Software is not cleared by the FDA and that it is supplied for investigational purposes only. When the study is complete, the Knee Software will be disabled.

### **7.7 DURATION OF TREATMENT**

Each randomized participant will receive a total of eight doses of intra-articular triamcinolone acetonide 40 mg/mL or placebo, one dose every twelve weeks over a two-year period. In this study a month is defined as 28 days.

### **7.8 WARNINGS AND PRECAUTIONS**

#### ***7.8.1 Triamcinolone***

Joint sepsis is a primary concern in relation to intra-articular injection. However, while its rate of occurrence is difficult to measure with certainty, it is clearly low. A 1999 estimate from a retrospective survey in France suggests a rate of 13 infections per million injections, lower with pre-packaged syringes[63]. Concordant with this low estimate, a survey of all cases of septic arthritis incident between 1982 to 1991 in Nottingham, UK (which had a base population of 600,000) identified only 3 cases attributable to IACS[64].

More frequent, but of less medical concern, are local aseptic inflammatory reactions to IACS injections[65]. These self-limiting events have been reported with rates up to 24% in some

series[45-47, 66]. The biologic basis for these reactions is uncertain but may relate to the crystalline nature of the injected corticosteroid formulations.

There is systemic absorption of steroid injected into a joint. Peak plasma levels after an intra-articular injection of 80 mg methyl prednisolone are in the order of 169 ng/ml, achieved 8 hours post injection[67]. A measurable transient effect on the pituitary axis is apparent with injections of 40 mg of methyl prednisolone[68] or >40 mg triamcinolone diacetate[69]. However, it seems unlikely that this has any long term effects at the frequency planned in this study (3 months). Problems with the pituitary axis were also apparently not encountered in an RCT in which IACS were administered every 3 months over a 24 month period[51]. While links have been made between IACS and various systemic features (immunosuppression[70], impaired diabetes control[71, 72], flushing, menstrual irregularities[73]) substantial data quantifying their frequency is generally lacking[56, 74]. One study provided data showing elevation in blood pressure and blood glucose levels following epidural corticosteroid injections, but the doses used were greater than those proposed in this study[71]. Anaphylaxis after IACS has been rarely reported[75, 76], as has steroid psychosis[77].

The most systematic evaluation of adverse effects from IACS was performed by Bellamy, in a Cochrane review of their efficacy for OA[57]. He found that side effects were uncommon and noted no reports of serious adverse events among the trials reviewed. Reported adverse events included post-injection flare, crystal-induced synovitis, tissue atrophy, fat necrosis, calcification, joint sepsis, steroid arthropathy, avascular necrosis, hematoma, fluid retention, hyperglycemia and hypertension.

Pregnancy Category: Rating C (FDA) Studies in animals have revealed adverse effects on the fetus (teratogenic or embryocidal or other) and there are no well-controlled studies in women, or studies in women and animals are not available. Drugs should be given only if the potential benefit justifies the potential risk to the fetus.

Animal studies have indicated that steroids may be teratogenic, therefore birth control for women of childbearing potential will be required for this study.

Participants will be given a handout post-injection of post-procedure care, as well as signs and symptoms that require medical attention.

### ***7.8.2 0.9% Sodium Chloride (placebo)***

Though reactions to a physiological fluid are not expected, adverse events could occur because of the technique of administration or contamination of the fluid. These could result in a febrile response, local tenderness, abscess, tissue necrosis, thrombosis or infection at the site of injection. Based on the data described above, the likely incidence of such events is extremely low.

Participants will be given a handout post-injection of post-procedure care and signs and symptoms that require medical attention.

### ***7.8.3 MRIs and Women of Child Bearing Potential***

MRIs should be avoided during the first trimester. Therefore, birth control for women of childbearing potential will be required for this study.

### ***7.8.4 Uncontrolled HIV Infection***

Patients who have been diagnosed as HIV + will be required to review the study with their infectious disease physician and provide a letter from their physician confirming his/her belief that the study is safe for the patient.

## *8. Procedures and Monitoring*

### **8.1 RANDOMIZATION**

Randomization will be stratified by radiographic severity of knee OA at baseline (Kellgren and Lawrence grade of 2 or 3) and gender. Specially designed software will be used to generate the random numbers. The statistician will review lists prior to release and will keep a copy of the randomization list in a locked filing cabinet. The randomization list will be released to the research pharmacist at Tufts Medical Center who will be unblinded to participants' treatment allocation / randomization.

To preserve the concealment of the randomized treatment allocation, only the statistician and research pharmacist will have access to the treatment assignments, and neither will have any interaction with study subjects. All other members of the research team are to remain blinded to treatment assignment to prevent unblinding of study personnel who interact with study subjects, and to prevent study personnel from selectively recruiting subjects due to advance knowledge of upcoming treatment assignments.

### **8.2 GOOD CLINICAL PRACTICE (GCP) AND MONITORING**

This study will be performed under U.S Code of Federal Regulations (CFR 21), International Committee on Harmonization (ICH) and Good Clinical Practice (GCP) guidelines. The protocol, informed consent form (ICF), and recruitment materials will be submitted to the Institutional Review Board (IRB) of the Tufts Health Sciences Campus and Tufts Medical Center for review and approval. Annual continuing review of the project will be submitted to the IRB and any other governmental agencies as required.

All Unanticipated Problems and SAEs will be reported according the Tufts MC / TUHS Campus IRB policy. All Unanticipated Problems will be reported to the DSMB (via KAI) and Tufts IRB within 48 hours of knowledge of the event. All SAEs (regardless of being anticipated or unanticipated) will be reported to the DSMB's Safety Officer (via KAI) within 48 hours of knowledge of event. All anticipated SAEs that have been reported to the DSMB will be submitted to the Tufts IRB within 15 business days. All anticipated non-serious AEs that have been reported to the DSMB will be summarized on the TMC AE Summary Report Form and submitted to the Tufts IRB annually at the time of continuing review. Please see section 8.8 for additional details.

The investigator agrees to any inspections of study-related records by the National Institutes of Health (NIH), FDA, CDER, and / or Tufts Medical Center IRB and other regulatory bodies as required.

### **8.3 ELECTRONIC DATA CAPTURE**

We will use electronic data capture (EDC) for Case Report Form (CRF) completion and most source documentation. We will use for this our secure website, which is hosted on a Tufts-owned server.

#### ***8.3.1 Security of the Electronic Data***

Our web server is owned by Tufts Medical Center and so is inaccessible without an individual secure username and password provided to the study staff. Study participants will also receive secure usernames and passwords to enable them to answer website-based questionnaires only. The server is highly protected by its architecture, firewalls and anti-virus software, and user authentication protocols. Within this structure, our website will have an additional layer of user authentication using high level time-expiring passwords for study staff. We will also operate user-type permission levels to constrain access to the different functions and data (role-based security). We will encrypt in the database highly sensitive information such as passwords. As part of the institutional network protections and maintenance, our database will be backed up regularly (at least daily), which will ensure that any data can be recovered in case of erasure or other hardware loss. Finally, each software component will be updated regularly by our IT group. Patches and other updates on servers are done daily to ensure that Microsoft's vulnerabilities can be identified and solved quickly.

### **8.3.2 HIPAA**

In order to be compliant with Health Insurance Portability and Accountability Act (HIPAA) requirements, we will operate the following additional procedures:

1. Database normalization. Using a practice known as standard normalization of data, participant names will not be stored in the same database table as their contact information. It is through this framework that two database tables will need to be queried in order to link a participant's name with their protected health information (PHI).
2. Use of encryption for sensitive information such as passwords.
3. Database audit trails. Deletions and major changes made to a participant's stored information will be tracked automatically.
4. Any paper records that we store (e.g. consent forms) will be kept in our secure office environment protected by two levels of lockage (e.g. in a locked filing cabinet in a locked office area).

## **8.4 CONSENTS**

### **8.4.1 Informed Consent**

Prior to study participation, each potential participant will be provided with an informed consent form (ICF) to read. At the first screening visit each potential participant will have a discussion about the study requirements and expectations with trained study staff. The principal investigator (PI) or a sub-investigator (Sub-I) will be available for additional questions. If the potential participant agrees to the study requirements and expectations then the ICF will be signed and dated by both the participant and the study staff. A copy of the signed ICF will be given to the participant and the original kept in the research files in the Division of Rheumatology.

Potential study participants who suffer visual or auditory impairment will be required to bring an unbiased designee to ensure their understanding of the consent documents. These participants will be subject to the same eligibility criteria as anyone else, provided that they are able to participate in all required aspects of the study (e.g. 20-meter walk, filling out questionnaires, etc.). Any amendments that warrant changes to the ICF will be submitted to the IRB for review and approval. Any new version of the ICF will be presented to the active participants at their next study visit and discussed. The participants will then decide if they want to continue their study participation. If they choose to continue to participate then the participants will sign the new ICF. A copy of the signed ICF will be given to the participant.

### **8.4.2 Research Authorization Form**

To comply with the Health Insurance Portability and Accountability Act (HIPAA) of 1996 each participant will provide written permission to allow their personal/protected health information (PHI) to be disclosed within the context of this research project.

A valid Research Authorization Form (RAF) is an individual's signed permission that allows a covered entity, in this study Tufts Medical Center, to use or disclose the individual's PHI for the purposes and to the recipients stated in the RAF. When a research authorization is obtained, the Privacy Rule requires that it pertain only to a specific research study, not to future, unspecified study projects.

Once the RAF is signed, the participant will be given a copy of the signed RAF. Participants that choose not to sign a RAF will be excluded from the study. A copy of the RAF will be submitted to and filed in the IRB.

### **8.4.3 E-Mail**

Research participants desiring to communicate with research team members during the study shall provide written consent as per Tufts Medical Center's guidelines for electronic mail communication of protected health information.

#### ***8.4.4 Photography/Video-Recording***

Research participants who are willing to participate in the gait analysis portion of the study will be presented with a photography/video consent form.

Participants who do not wish to sign the photography/video-recording consent form will not be excluded from participation into the study.

#### ***8.4.5 Optional Tissue Banking***

Research participants will be presented with a Tissue Banking ICF. All subjects will sign the optional tissue banking ICF noting which specimens (plasma, serum, buffy coat, urine, and/or synovial fluid), they consent to have banked.

Participants who do not wish to have specimens banked for future studies will not be excluded from participation in the main study.

### **8.5 OBSERVATIONS AND MEASUREMENTS**

#### ***8.5.1 Study Visits***

All efforts will be made to keep the time of participants' study visits consistent (i.e., all a.m. or all p.m.) throughout the study to minimize intra-patient variability. Additionally, keeping a participant's study visits at approximately the same time will be important to laboratory specimen collection and MRI scanning. Laboratory collections and MRI scans done at approximately the same time for each participant will decrease biorhythm variability in the laboratory samples and MRI scans. The time of blood draw and urine collection will be noted at each visit. Participants who will be having an MRI scan will be asked to refrain from strenuous physical activity the day before their scheduled MRI scan.

Subjects who are randomized will receive a stipend for their participation in the study. Subjects that complete the screening visit will not receive a stipend. Subjects will receive \$100 upon completion of Visit Months 0,3,6,9,12,15,18, and 21 and \$200 upon completion of Visit Month 24 for a total of \$1000 over the 2 years in which they are in the study. Subjects have the option of receiving the study payment as a petty cash payment or Tufts debit Mastercard (Clincard) given at the end of each study visit or as a check for the total amount at the end of their study participation. Petty cash slips can be cashed out only at the Cashier's Office on the 1<sup>st</sup> Floor of the Proger Building at Tufts Medical Center.

Subjects who agree to participate in either of 2 MRI Ancillary studies (detailed in Section 8.5.6) will be compensated an extra \$50 for each additional MRI. Thus, those who participate in MRI Ancillary Study #1 will receive \$50 total extra compensation for a total of \$1050 upon study completion; those who participate in MRI Ancillary Study #2 will receive \$100 total extra compensation for a total of \$1100 upon study completion.

Beginning at Month 3, the study visit window will be +/- 1 week; however, MRI will have up to 2 weeks prior to Month 0, 12, and 24. The visit schedule and procedures that will occur at each visit are summarized in Appendix B.

### **Month -1, Screening**

This is the initial screening visit. Prior to any research procedures being done informed consent will be obtained. The remaining procedures may be done at this visit:

- ◆ Confirm that subject has had 48 hour wash-out of NSAIDs / Analgesics
- ◆ Vital signs (BP, temperature)
- ◆ Height and Weight
- ◆ Obtaining informed consent and research authorization (and other applicable consents, e.g., e-mail communication, photography/video-recording, optional tissue banking) from the potential participant
- ◆ Participant WOMAC® LK3.1 pain subscale – Right and Left knees
- ◆ Collection of demographic data
- ◆ Collect rheumatic history, include type, duration, and treatment history of OA as well as notation of any known complications of disease or therapies
- ◆ Medical & surgical history to include past medical history, secondary diagnoses, concomitant medications, all medications and treatments taken within the last two months
- ◆ Bilateral knee examinations
- ◆ Participant physical function test (20 meter walk)
- ◆ MRI coil fit check
- ◆ Knee x-rays – bilateral, weight bearing, semi-flexed, posteroanterior (PA)
- ◆ Bilateral knee ultrasound scans
- ◆ Laboratory studies (which will be analyzed prior to the first injection to determine eligibility)
  - Hemoglobin A1c
  - Rheumatoid factor, anti-CCP and hsCRP
  - Urine Pregnancy Test (only for women who have not been menopausal for 2 years or who have not undergone surgical sterilization)
- ◆ Provide and teach use of participant diary/calendar/journal
- ◆ Randomization

### **Month 0, Baseline (up to 21 days after Screening)**

This is the first visit of the double-blind treatment period. Only those participants that fulfill inclusion/exclusion criteria will be randomized. The following procedures will be done at this visit:

- ◆ Confirm that subject has had 48 hour wash-out of NSAIDs / Analgesics
- ◆ Vital signs (BP, temperature)
- ◆ Review of informed consents – study requirements and expectations
- ◆ Height/Weight
- ◆ Participant WOMAC® LK3.1, SF-36, HAQ, VAS global assessment
  - \*The Alignment questionnaire can be completed once at any visit, Baseline or after, at participant convenience
- ◆ Collect and review diary/Issue new diary
  - Concomitant medications
  - Adverse experiences
  - Re-educate about diary/calendar/journal
  - Present and discuss calendar of target/ideal visit dates and times for Months 3-24 visits
- ◆ Knee examination
- ◆ Musculoskeletal examination
- ◆ Participant physical function tests (chair stand, 20 meter walk)
- ◆ Laboratory studies / collections



- Hemoglobin A1c
- Serum CrossLaps
- Serum for archive
- Plasma for archive
- Urine CrossLaps
- Urine for storage
- White Blood Cell (Buffy Coat) archive
- Synovial fluid (if obtained) for cell count, crystal exam
- Synovial fluid (if obtained) for archive
- ◆ MRI of study knee (this exam will be done up to two weeks prior to Month 0 and reviewed for any exclusionary criteria prior to first injection)
- ◆ \*For 10 participants who volunteer, a 2<sup>nd</sup> MRI of study knee within 5 days of the first at the opposite MRI location
- ◆ \*For 15 participants who volunteer, a 2<sup>nd</sup> MRI of study knee within 5 days of the first at the same MRI location
- ◆ DXA – bilateral hip, knee and lumbar spine
- ◆ Knee ultrasound exam
- ◆ Knee injection of triamcinolone or placebo by ultrasound guidance

### **Month 3 (+/- 1 week window)**

The following procedures will be done at this visit:

- ◆ Confirm that subject has had 48 hour wash-out of NSAIDs / Analgesics
- ◆ Vital signs (BP, temperature)
- ◆ Participant WOMAC<sup>®</sup> LK3.1, VAS global assessment
- ◆ Collect and review diary/Issue new diary
  - Concomitant medications
  - Adverse experiences
  - Analgesia/NSAID accounting
- ◆ Laboratory studies
  - Hemoglobin A1c
  - Synovial fluid (if obtained) for cell count, crystal exam
  - Synovial fluid (if obtained) for archive
- ◆ Knee examination
- ◆ Knee injection of triamcinolone or placebo by ultrasound guidance

### **Month 6 (+/- 1 week window)**

The following procedures will be done at this visit:

- ◆ Confirm that subject has had 48 hour wash-out of NSAIDs / Analgesics
- ◆ Vital signs (BP, temperature)
- ◆ Participant WOMAC<sup>®</sup> LK3.1, VAS global assessment
- ◆ Participant physical function tests (chair stand, 20 meter walk)
- ◆ Collect and review diary/Issue new diary
  - Concomitant medications
  - Adverse experiences
  - Analgesia/NSAID accounting
- ◆ Laboratory studies / collections
  - Hemoglobin A1c

- Synovial fluid (if obtained) for cell count, crystal exam, and/or culture analysis
- Synovial fluid (if obtained) for archive
- ◆ Knee ultrasound exam
- ◆ Knee examination
- ◆ Knee injection of triamcinolone or placebo by ultrasound guidance

### **Month 9 (+/- 1 week window)**

The following procedures will be done at this visit:

- ◆ Confirm that subject has had 48 hour wash-out of NSAIDs / Analgesics
- ◆ Vital signs (BP, temperature)
- ◆ Participant WOMAC<sup>®</sup> LK3.1, VAS global assessment
- ◆ Collect and review diary/Issue new diary
  - Concomitant medications
  - Adverse experiences
  - Analgesia/NSAID accounting
- ◆ Laboratory studies / collections
  - Hemoglobin A1c
  - Synovial fluid (if obtained) for cell count, crystal exam
  - Synovial fluid (if obtained) for archive
- ◆ Knee examination
- ◆ Knee injection of triamcinolone or placebo by ultrasound guidance

### **Month 12 (+/- 1 week window)**

The following procedures will be done at this visit:

- ◆ Confirm that subject has had 48 hour wash-out of NSAIDs / Analgesics
- ◆ Vital signs (BP, temperature)
- ◆ Height/Weight
- ◆ Participant WOMAC<sup>®</sup> LK3.1, SF-36, HAQ, VAS global assessment
- ◆ Participant physical function tests (chair stand, 20 meter walk)
- ◆ Collect and review diary/Issue new diary
  - Concomitant medications
  - Adverse experiences
  - Analgesia/NSAID accounting
- ◆ Knee examination
- ◆ Laboratory studies / collections
  - Hemoglobin A1c
  - hsCRP
  - Serum CrossLaps
  - Serum for archive
  - Plasma for archive
  - Urine CrossLaps
  - Urine for storage
  - White Blood Cell (Buffy Coat) archive
  - Synovial fluid (if obtained) for cell count, crystal exam
  - Synovial fluid (if obtained) for archive
- ◆ MRI of study knee (*this exam will be done up to two weeks prior to Month 12*)
- ◆ DXA – bilateral hip, knee and lumbar spine

- ◆ Knee ultrasound exam
- ◆ Knee injection of triamcinolone or placebo by ultrasound guidance

### **Month 15 (+/- 1 week window)**

The following procedures will be done at this visit:

- ◆ Confirm that subject has had 48 hour wash-out of NSAIDs / Analgesics
- ◆ Vital signs (BP, temperature)
- ◆ Participant WOMAC<sup>®</sup> LK3.1, VAS global assessment
- ◆ Collect and review diary/Issue new diary
  - Concomitant medications
  - Adverse experiences
  - Analgesia/NSAID accounting
- ◆ Laboratory studies / collections
  - Hemoglobin A1c
  - Synovial fluid (if obtained) for cell count, crystal exam
  - Synovial fluid (if obtained) for archive
- ◆ Knee examination

Knee injection of triamcinolone or placebo by ultrasound guidance

### **Month 18 (+/- 1 week window)**

The following procedures will be done at this visit:

- ◆ Confirm that subject has had 48 hour wash-out of NSAIDs / Analgesics
- ◆ Vital signs (BP, temperature)
- ◆ Participant WOMAC<sup>®</sup> LK3.1, VAS global assessment
- ◆ Participant physical function tests (chair stand, 20 meter walk)
- ◆ Collect and review diary/Issue new diary
  - Concomitant medications
  - Adverse experiences
  - Analgesia/NSAID accounting
- ◆ Laboratory studies / collections
  - Hemoglobin A1c
  - Synovial fluid (if obtained) for cell count, crystal exam
  - Synovial fluid (if obtained) for archive
- ◆ Knee ultrasound exam
- ◆ Knee examination
- ◆ Knee injection of triamcinolone or placebo by ultrasound guidance

### **Month 21 (+/- 1 week window)**

The following procedures will be done at this visit:

- ◆ Confirm that subject has had 48 hour wash-out of NSAIDs / Analgesics
- ◆ Vital signs (BP, temperature)
- ◆ Participant WOMAC<sup>®</sup> LK3.1, VAS global assessment
- ◆ Collect and review diary/Issue new diary
  - Concomitant medications
  - Adverse experiences
  - Analgesia/NSAID accounting
- ◆ Laboratory studies / collections

- Hemoglobin A1c
- Synovial fluid (if obtained) for cell count, crystal exam
- Synovial fluid (if obtained) for archive
- ◆ Knee examination
- ◆ Knee injection of triamcinolone or placebo by ultrasound guidance

### **Month 24 (+/- 1 week window)**

Month 24 is the final visit of the double-blind treatment period. The following procedures will be done at this visit:

- ◆ Confirm that subject has had 48 hour wash-out of NSAIDs / Analgesics
- ◆ Vital signs (BP, temperature)
- ◆ Height/Weight
- ◆ Participant WOMAC® LK3.1, SF-36, HAQ, VAS global assessment
- ◆ Participant physical function tests (chair stand, 20 meter walk)
- ◆ Collect and review diary/Issue new diary
  - Concomitant medications
  - Adverse experiences
  - Analgesia/NSAID accounting
- ◆ Laboratory studies / collections
  - Hemoglobin A1c
  - hsCRP
  - Serum CrossLaps
  - Serum for archive
  - Plasma for archive
  - Urine CrossLaps
  - Urine for storage
  - White Blood Cell (Buffy Coat) archive
  - Synovial fluid (if obtained) for cell count, crystal exam
  - Synovial fluid (if obtained) for archive
- ◆ MRI of study knee (this exam will be done up to two weeks prior to Month 24)
- ◆ \*For 15 participants who volunteer, a 2<sup>nd</sup> MRI of study knee within 5 days of the first at the same MRI location
- ◆ Knee x-rays – bilateral, weight bearing, semi-flexed, posteroanterior (PA)
- ◆ DXA – bilateral hip, knee and lumbar spine
- ◆ Knee ultrasound exam

### **Premature Termination / Early Termination**

A participant may choose to withdraw his or her study participation, or be withdrawn from the study by the investigator. The following procedures, as applicable, should be done:

- ◆ Confirm that subject has had 48 hour wash-out of NSAIDs / Analgesics
- ◆ Vital signs (BP, temperature)
- ◆ Height/Weight
- ◆ Participant WOMAC® LK3.1, SF-36, HAQ, VAS global assessment
- ◆ Participant physical function tests (chair stand, 20 meter walk)
- ◆ Collect and review diary
  - Concomitant medications
  - Adverse experiences

- Analgesia/NSAID accounting
- ◆ Knee examination
- ◆ Laboratory studies /collections
  - Hemoglobin A1c
  - Serum CrossLaps
  - Serum for archive
  - Plasma for archive
  - Urine CrossLaps
  - Urine for storage
  - White Blood Cell (Buffy Coat) archive
  - Synovial fluid (if obtained) for cell count, crystal exam
  - Synovial fluid (if obtained) for archive
- ◆ MRI of study knee
- ◆ Knee x-rays – bilateral, weight bearing, semi-flexed, posteroanterior (PA)
- ◆ DXA – bilateral hip, knee and lumbar spine
- ◆ Knee ultrasound exam

### **Interim Visit**

A participant may need to be seen in between scheduled visits. The following procedures, as applicable, should be done:

- ◆ Confirm that subject has had 48 hour wash-out of NSAIDs / Analgesics
- ◆ Vital signs (BP, temperature)
- ◆ Height/Weight
- ◆ Participant WOMAC<sup>®</sup> LK3.1, SF-36, HAQ, VAS global assessment
- ◆ Participant physical function tests (chair stand, 20 meter walk)
- ◆ Collect and review diary
  - Concomitant medications
  - Adverse experiences
  - Analgesia/NSAID accounting
- ◆ Knee examination
- ◆ Laboratory studies /collections
  - Hemoglobin A1c
  - Serum CrossLaps
  - Serum for archive
  - Plasma for archive
  - Urine CrossLaps
  - Urine for storage
  - White Blood Cell (Buffy Coat) archive
  - Synovial fluid (if obtained) for cell count, crystal exam
  - Synovial fluid (if obtained) for archive
- ◆ MRI of study knee
- ◆ DXA – bilateral hip, knee and lumbar spine
- ◆ Knee ultrasound exam

### **Safety Follow-Up**

One month (28 days) following final study visit, certain participants will be contacted to follow-up on any adverse experiences that were noted at Month 24 (or premature termination) visit.

### **8.5.2 Blood Pressure Measurements**

Blood pressure will be measured at every visit throughout the study. As recommended by National Heart, Lung, and Blood Institute[188], the auscultatory (manual) method of measurement should be used. Patients will be asked to sit quietly in a chair with feet on the floor for five minutes prior to measurement. Two measurements will be made, and the average computed and reported as the visit blood pressure.

We will use JNC 7 guidelines (Appendix J) in order to monitor those patients with elevated blood pressures and to determine whether patients exhibit “new hypertension” for study purposes. Per the American Heart Association, the study will define “new hypertension” as an average measurement (of two readings, at approximately 5 minutes apart) of 140 or greater systolic or 110 or greater diastolic on three separate occasions. Furthermore, the AHA does not specifically define “worsening hypertension”. For this study, we will utilize the following definition, based on the JNC 7 and AHA guidelines described above: “Worsening hypertension” is an average measurement (of two readings, at approximately 5 minutes apart, on three separate occasions) of a systolic or diastolic blood pressure falling into a JNC category of at least “Stage 1 Hypertension” (>139 systolic or >90 diastolic) and higher than that which the patient has established in the study. The Screening visit measurement will serve as the initial “established” hypertension category for patients. For example, a patient with previously established Stage 1 hypertension whose Month 3 readings average to Stage 2 hypertension will be asked to self-monitor in the interim between his Month 3 and Month 6 visits.

“Three separate occasions” will be defined as 1-month intervals between readings. Therefore, patients who are asked to self-monitor between visits based on the criteria outlined above will be asked to report at-home measurements at 1 month and 2 months following the visit. Study staff will proactively call patients at these intervals to collect blood pressure readings. Patients whose readings remain elevated at all three measurements (study visit, study visit + 1 month, and study visit + 2 months) will be encouraged to consult with their primary care physician. We feel that monitoring of hypertensive thresholds is important considering the age demographics of our study population and the recognized potential hypertensive effects of the study drug as noted in Section 2.7 above.

### **8.5.3 Knee Exams**

Bilateral knee exams will be performed at Screening and Baseline visits. The Screening exam will be completed by a Research Assistant/Coordinator, while the more comprehensive Baseline (musculoskeletal) exam will be completed by a study physician. The purpose of both exams is to ensure patient eligibility and rule out any forms of arthritis other than OA. Brief knee exams will also be performed on the participant’s index knee by the injecting study physician prior to administering each injection to ensure the health of the knee for injection.

### **8.5.4 Laboratory**

Tufts Medical Center will analyze blood samples for Hemoglobin A1c, Rheumatoid factor, anti-CCP and hsCRP. Pregnancy tests will be performed for all women of child-bearing potential prior to exposure to any radiation.

### **8.5.5 Radiology**

Bilateral knee radiographs will be collected on all potential participants at Screening and at Month 24 (or Early Termination, if warranted). Participants will be screened for evidence of tibiofemoral OA with a Kellgren and Lawrence (K/L) score of 2 or 3, as evidenced on bilateral, PA semi-flexed, weight bearing knee x-rays. X-rays are obtained using a Synflexor Positioning Frame (Synarc,

Inc. San Francisco, CA). X-rays will be evaluated for K/L score and joint space width (JSW) measurements.

### **8.5.6 Knee MRI**

MRIs for this protocol will be done at either Tufts Medical Center or the Center for Biomedical Imaging (CBI) at Boston University Medical Campus. Tufts Medical Center radiologist Dr. R. Ward and CBI director Dr. Ronald J. Killiany, PhD, will develop the sequences and will supervise scanning. The protocol will utilize a Philips Achieva X-Series 3.0 Tesla scanner. This scanner includes the SmartKnee technology, an automated algorithm that ensures replication of the original parameters and positioning (and hence reproducibility) of repeat scans<sup>[189]</sup>. Participants will have three MRIs of their study knee; at Month 0, 12, and 24 (or ET if indicated).

#### **8.5.6a Inter-Scanner Reliability Testing**

Because the study is utilizing two separate facilities for MRI scans, we will employ a reliability test between the scanners at each site (Tufts MC and BU CBI). Each individual participant will be scanned at the same site at Baseline, 12, and 24 Months. However, while the MRI scanner will be consistent across time for a particular participant, multiple MRI scanners may introduce an additional source of between-subject error in MRI-based measurements. In consultation with the Data and Safety Monitoring Board we have opted to conduct an assessment of inter-scanner reliability between the Philips Achieva 3X-Series 3.0 Tesla scanners at Tufts Medical Center and Boston University. Ten participants will be recruited at Baseline and asked to volunteer to undergo two Baseline MRI scans: they will attend their standard MRI scan at Tufts Medical Center or Boston University, and within 5 days attend a second session to be scanned at the other site. The time between scans will be minimized to ensure that structural changes do not occur between scans. The additional Baseline MRI scan will require the participant to attend an extra 40 to 60 minute visit. Participants will receive additional compensation to cover the extra time and travel expense. The patient's follow-up scans will take place as normal at the location of the first Baseline scan. Data from the Tufts Medical Center and Boston University MRI scanners will be compared to determine inter-scanner reliability and agreement.

#### **8.5.6b Assessment of Smallest Detectable Differences**

Recent recommendations for assessing structural progression suggest that it is advantageous to present clinical outcomes at an individual level (e.g., percent progressors) based on a cut-off defined by change in outcomes greater than a smallest detectable difference<sup>[190]</sup>. Unfortunately, smallest detectable differences are poorly defined for MRI-based outcomes and may be very specific to a study population. Therefore, we will perform repeat MRI scans to determine smallest detectable differences in our study population. Fifteen participants will be recruited to undergo 2 Baseline (Month 0) and 2 24-month MRI scans at Boston University. We will make an effort to ensure that repeat scans during each time period (Baseline or 24-month follow-up) will be performed within 5 days in order to be certain that structural changes do not occur between repeat scans.

Fifteen participants will be recruited with anticipation that up to 3 participants may be lost at follow-up. With a sample size of 12 participants we will calculate smallest detectable differences for our study population. These participants will be expected to complete 2 extra MR scans, but to minimize participant burden the repeated scans will only include two sequences: one for measuring cartilage volume (3D WATSc) and a second for quantifying bone marrow lesions (sagittal PDW HR SPAIR). These extra visits will take 20

to 30 minutes each. Participants will receive additional compensation to cover the extra time and travel expense.

### **8.5.7 Knee Ultrasonography**

Ultrasound examination of the knee will be performed in the Rheumatology Outpatient Clinic at Tufts Medical Center under the direction of Dr. J. Vinh. Participants will have six ultrasound knee exams of their study knee; at Month -1 (screening), 0 (baseline), 6, 12, 18, and 24 study visits. All IA injections will be done under ultrasound guidance to verify needle placement in the joint space.

### **8.5.8 DXA (Bone Density Testing)**

Bilateral hip, study knee, lumbar spine, and total body composition DXA scans will be done in the Rheumatology Outpatient Clinic at Tufts Medical Center. These measurements will be obtained using the GE Lunar Prodigy Advance medical device dedicated for this study. The software applications for hip and spine DXA are provided by GE and are cleared by the FDA. The knee software is provided by GE, but is investigational in nature because it has not received FDA clearance. The knee software is not being used as a primary measurement tool, but as a secondary tool. Randomized participants will undergo three DXA studies; Month 0, 12, and 24. The weight and height measurements will be obtained on the same day as each DXA exam.

### **8.5.9 Physical Function Tests**

Physical function will be assessed using the 20-meter walk test (to measure walking speed) and/or the chair stand test (to measure lower extremity strength and balance).

### **8.5.10 Observed Gait Analysis**

In order to obtain dynamic gait assessments, including varus thrust, we will perform an observational gait analysis (OGA). We will video record the participants walking barefooted 20 meters down a corridor and turning around to walk another 20 meters back, at the participant's chosen speed. (See below for diagram.)

OGA will be obtained on consenting participants at Month 0, 12, and 24 study visits. Subjects who do not want to be videotaped may opt out of this portion of the protocol. Similarly, participants who require the use of a walking aid will be excluded from this portion of the protocol while still being able to participate in the remainder of this study.

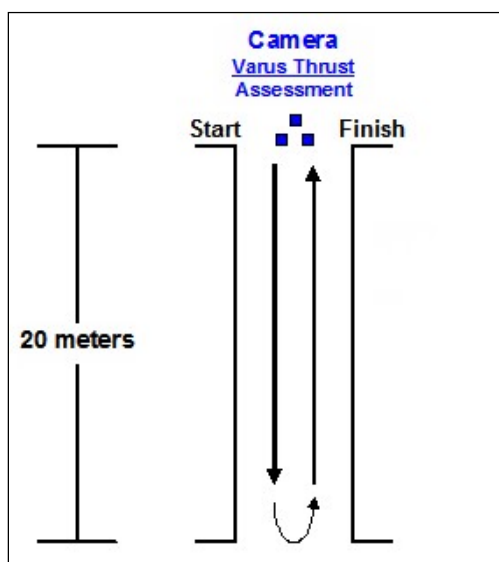



## **8.6 PARTICIPANT COMPLIANCE**

### ***8.6.1 Investigational Product***

Compliance of the IP will be ensured as the participant is either receiving the IACS or the IA placebo of Normal Saline at each study visit.

### ***8.6.2 Study Visits***

It is expected that randomized participants will complete all study visits. Participants missing visits will be contacted to reschedule missed appointments.

## **8.7 CONCOMITANT MEDICATIONS**

The use of concomitant medications is allowed, **except** for the following:

- Other investigational drugs
- MMP-like medications (i.e., tetracyclines or related compounds e.g., Doxycycline)
- Chronic glucocorticoid use
- Glucocorticoid intra-articular injections
- Hyaluronic acid formulation intra-articular injections

At the screening visit all concomitant medications (prescription, over-the-counter, and complementary alternative medicines (CAMs)) taken within the previous 90 days will be recorded. The name, dose, frequency, and start/stop dates will be noted. Throughout the study all concomitant medications will be recorded in similar fashion.

### ***8.7.1 Washout Period***

Participants will be asked to discontinue use of any analgesics (NSAIDs, opioids) two full days prior to each pain assessment (including the baseline eligibility evaluation) and take only acetaminophen (up to 3 grams/day) if needed. If acetaminophen is consumed in the two days prior to the study visit, participants will be asked to record this in their study calendars.

## **8.8 UNANTICIPATED PROBLEMS AND ADVERSE EXPERIENCES/EVENTS (AE)**

All Unanticipated Problems and Adverse Events will be reported according to Tufts Medical Center/Tufts University Health Sciences Institutional Review Board (IRB) and study DSMB guidance. The following protocol has been adapted from the Tufts IRB policies.

### ***8.8.1 Definitions***

#### ***Unanticipated Problem (UP)***

Definition: An *Unanticipated Problem* is an incident, experience, or outcome that meets all of the following criteria:

1. The nature, severity, or frequency is unexpected for the subject population or research activities as described in the current IRB approved protocol, supporting documents, and the ICF(s).
2. It is related or possibly related to participation in the research.
3. It suggests the research may place the subject or others at a greater risk of harm than was previously recognized.

### **Adverse Event (AE)**

Definition: An *AE* is any untoward or unfavorable medical occurrence in a human subject, including any abnormal physical exam or laboratory finding, symptom, or disease, temporally associated with a subject's participation in the research. Every *AE* is classified as:

1. *Non-serious* or *Serious*
2. *Related* (includes both definite and probable relationships), *Possibly Related*, or *Unrelated* to participation in the research.
3. *Expected* or *Unexpected* based on the known:
  - a. Risks associated with drugs, devices, or other protocol activities described in the IRB approved protocol, supporting documents, and ICFs, or
  - b. Natural progression of an underlying illness, or
  - c. Health characteristics of the study population.

### **Serious Adverse Event (SAE)**

Definition: A *SAE* is any *AE* that:

1. Results in *death*, or
2. Is *life-threatening*, or
3. Results in *hospitalization* or *prolongation of existing hospitalization*, or
4. Results in a *persistent or significant disability/incapacitation*, or
5. Results in a *congenital anomaly/birth defect*, or
6. May *jeopardize the subject's health and may require medical or surgical intervention to prevent one of the other outcomes listed above*.

### **Determination of whether an Adverse Event is an Unanticipated Problem**

An *Unanticipated Problem* is a major concern of an investigator and the IRB as it generally requires actions such as modification or suspension of the protocol, or informing subjects. **All three** of the criteria in the definition above must be met to be an *Unanticipated Problem*. This means that not all *Unexpected Serious Adverse Events* are *Unanticipated Problems* since some of them may, for example, not be related to the participation in the research study. Likewise, there does not have to be an *AE* to be an *Unanticipated Problem*.

For example, an event may be observed which is unexpected, related to participation in a study, but did **not** result in harm to the subject. If, however, it is determined that the subject (or others) are at an **increased risk** for harm, this would be an *Unexpected Problem*. *Unanticipated Problems* do not only include risks of physical harm, but also psychological, economic, or social harm. Please see the flow chart in Appendix A for more detail, and Appendix B for specific examples.

All *Unanticipated Problems* must be promptly reported to the IRB. *Unanticipated Problems* may also require prompt reporting to the appropriate institutional officials, the study sponsor or funding source (if applicable), the FDA (for drug associated events), and/or OHRP.

## **8.8.2 UP and SAE/AE Reporting**

### **Unanticipated Problems**

Each **Unanticipated Problem** requires immediate action by the principal investigator (PI) as follows:

1. Immediate corrective action must be taken to eliminate or minimize risk to enrolled subjects. This could necessitate a voluntary hold on further enrollment and/or research activities for already enrolled subjects. If subjects are at immediate risk, these corrective actions must be initiated immediately, and if necessary for subject safety, simultaneous with completion of reporting requirements. In such an instance, the PI should immediately call the IRB office.
2. Enrollment of new subjects should be voluntarily stopped until a revised protocol and/or ICF(s) are reviewed and approved by the Tufts Medical Center/TUHS IRB. In some situations enrollment may continue, provided new subjects are not at risk, and the PI provides the IRB the necessary documentation in support of continuation of enrollment. It may also be necessary for the IRB to formally suspend a study under certain conditions.
3. The problem must be promptly reported to the Tufts Medical Center/TUHS IRB, and the DSMB (via KAI).
  - a. An initial report to the Tufts MC/TUHS IRB and DSMB must be submitted in writing no later than two (2) business days after the PI/study team become aware of the problem. This report is to briefly summarize the nature of the event, summarize the corrective action plan as developed and initiated at that time, and clarify whether subject enrollment is continuing. In the rare circumstance where an original written report cannot be submitted directly to the IRB office, it may be faxed within 2 business days (617-636-8394). The IRB office may be contacted by phone at 617-636-7512 for necessary guidance, and PIs are encouraged to do so.
  - b. An *Event Reporting Form* must be completed with accompanying documentation addressing each item in this list and submitted to the Tufts MC/TUHS IRB and DSMB no later than five (5) business days after the PI/study team became aware of the problem.

### **Serious Adverse Events (SAE)**

Reporting requirements vary for *SAEs* as follow:

1. A *SAE* that is *Related* or *Probably Related* and *Unexpected* meets criteria for an *Unanticipated Event* and should be acted upon as outlined above.
2. An *Internal SAE* not meeting criteria for an *Unanticipated Problem* must be reported to the DSMB within 48 hours and to Tufts Medical Center/TUHS IRB within fifteen (15) business days of the PI/research team learning of the event; the *SAE/UP Reporting Form* must be used.
  - a. If changes are required to the protocol and/or ICF(s), subject enrollment and study activities related to the AE, and not necessary for subject safety, cannot continue until the changes have been reviewed and approved by the Tufts Medical Center/TUHS IRB.

### **Non-serious Adverse Events**

1. All clinically significant *Internal Non-serious Adverse Events* not meeting criteria of an *Unanticipated Problem* can be summarized and submitted to the DSMB and Tufts Medical Center/TUHS IRB at the time of the continuing review, or when the PI terminates the study if this occurs before the date of the next continuing review.

Table 1. Guidelines for reporting *Unanticipated Problems* and *Adverse Events* to the Tufts MC/TUHS IRB.

|                                                                                                        |                                                                                                                                                                                                |
|--------------------------------------------------------------------------------------------------------|------------------------------------------------------------------------------------------------------------------------------------------------------------------------------------------------|
| <b><i>Unanticipated Problem: Internal</i></b>                                                          | Immediate reporting as described above<br>Completed <i>SAE/UP Reporting Form</i> with supporting documents submitted to IRB within 5 business days                                             |
| <b><i>SAE: Internal, Related or Probably Related, Unexpected</i></b>                                   | Meets criteria for an <b><i>Unanticipated Problem</i></b> and is to be reported as such                                                                                                        |
| <b><i>SAE: Internal</i></b> , all other situations                                                     | Complete <i>SAE/UP Reporting Form</i> and submit to IRB within 15 business days but notify the DSMB within 48 hours.                                                                           |
| <b><i>Non-Serious AE: Internal</i></b> , all situations not considered an <i>Unanticipated Problem</i> | Using the <i>Summary Reporting Form</i> for clinically significant AEs may be summarized at the time of Continuing Review, or study termination if before the next scheduled Continuing Review |

### **8.8.3 UP/AE/SAE Monitoring**

An independent Data Safety Monitoring Board (DSMB) will be assembled under the direction of KAI Research, Inc. (under contract with NIAMS). KAI will assemble the DSMB and the protocols for AE/SAE reporting and monitoring.

Study participants will be monitored for occurrence of adverse events per the protocol described above. This will be done proactively by (i) posing structured and open-ended questions at each visit to obtain information on undesirable experiences and (ii) by exerting surveillance of all laboratory tests. Also, a telephone number will be provided to participants to enable them to report any such experiences at any time to study personnel. Any participants who experience an adverse event between the hours of 5 PM and 8 AM that they feels requires medical attention should call the hospital page operator (617-636-5000) and ask to speak to the rheumatology fellow on call. If there is a life-threatening emergency, the participant should call 911 and go to the nearest emergency room.

## **8.9 EARLY WITHDRAWAL/TERMINATION OF PARTICIPANTS**

Every effort will be made to keep enrolled participants in the study since it has an ‘intent-to-treat’ design and withdrawals / early terminations / ‘drop-outs’ will not be replaced.

Participants may be prematurely terminated from the study for the following reasons:

- An adverse experience with such severity that continuation in the study is unsafe
- Failure to keep study appointments
- Relocation such that the participant is not able to travel to Tufts Medical Center
- Participant personal reasons, including withdrawal of consent
- Lost to follow-up after all reasonable attempts to locate the participant for early termination visit
- Joint replacement surgery, osteotomy, arthroscopy, arthrocentesis or other invasive procedure on the study knee

## 9. Computational Analyses

*Hypotheses 1a,b:* Knees with OA and synovitis treated with IACS for 2 years will exhibit (a) slower rates of cartilage volume loss (our primary *structural* outcome) (b) less progression in bone marrow lesions and subchondral bone attrition.

*Hypotheses 2a,b:* The treated knees will exhibit less change in (a) tibial subchondral bone mineral density and (b) apparent bone volume fraction.

*Hypotheses 3a,b,c:* The group assigned to IACS will have less (a) overall pain (our primary *clinical* outcome), (b) decline in physical function and (c) healthcare utilization

We will perform descriptive analyses of baseline characteristics of the treated and placebo groups to permit assessment of generalizability and success of randomization. All analyses will be stratified by the factors used to stratify the randomized treatment assignment: radiographic severity of knee OA at baseline (Kellgren and Lawrence grade of 2 or 3) and gender. We will use either linear regression analyses (stratified by radiographic severity and gender) or rank-based stratified Wilcoxon tests (also known as van Elteren's test) whenever appropriate. Our primary analytic approach will be to use intention-to-treat (ITT) analyses with mixed effects regression models for the longitudinal repeated measures data. We will also evaluate the dropout and adherence patterns of trial subjects to see if these issues may change the assessment of treatment effect.

Our analyses will evaluate the cartilage volume and WOMAC<sup>®</sup> LK3.1 pain scores over time using mixed effects regression models (incorporating both fixed and random effects) for longitudinal repeated

measures to see if there is a difference in the trajectory of the structural and clinical outcome measures over time between the treatment groups[191]. The two co-primary endpoints are (i) cartilage loss (structural) and WOMAC<sup>®</sup> LK3.1 pain (clinical). The models will include a random intercept for each subject, 3 dummy variables corresponding to the 4 randomization strata (gender and radiographic severity of KOA at entry to the trial (Kellgren and Lawrence grades 2 vs. 3)), use of analgesia (acetaminophen) at the times of outcome measurement, a time effect, an effect of treatment, and the interaction between time and treatment that will provide the basis for testing hypothesis 1 (i.e. testing if the trajectories are different between treatment groups). The effect of time will be assumed to be linear in this model unless preliminary data analysis suggests that the cartilage volume or WOMAC<sup>®</sup> LK3.1 score have a distinctly non-linear trend over time. The compound symmetry variance structure will be assumed for the correlation between repeated measures over time within a subject. If the likelihood cannot be maximized for this model, then the covariance structure will be simplified by removing the random intercept. In secondary analyses we will evaluate whether the clinical conclusions drawn from this trial are sensitive to the choice of different modeling methods.

For secondary analyses, we will employ linear regression analyses and the rank-based stratified Wilcoxon test (van Elteren's test), both stratified by radiographic severity and gender, to evaluate the difference between treatment groups in the change in WOMAC<sup>®</sup> LK3.1 scores or cartilage volume, as

**Table 4. Conceptualization of the study measures**

|                  | <b>Structural outcome</b>                                                                                                          | <b>Clinical outcome</b>                                                          | <b>Covariate</b>                                   |
|------------------|------------------------------------------------------------------------------------------------------------------------------------|----------------------------------------------------------------------------------|----------------------------------------------------|
| <b>Primary</b>   | cartilage volume                                                                                                                   | WOMAC <sup>®</sup> LK3.1 pain                                                    | knee alignment                                     |
| <b>Secondary</b> | BML Score<br>subchondral attrition<br>tibial medial:lateral BMD ratio<br>tibial subchondral aBVF<br>tibial BMD<br>femoral neck BMD | WOMAC <sup>®</sup> LK3.1 function<br>Physical function<br>healthcare utilization | femoral neck BMD<br><br>(synovitis; US and/or MRI) |

that is how these outcomes have often been analyzed. Multiple imputation will be used to address missing data due to dropout from the trial in the secondary analysis of change as well as to provide an alternative analysis of the longitudinal repeated measures from the primary analysis. This will allow us to gauge the sensitivity of the primary analysis to the dropout from the trial. Additional secondary analyses will use alternative regression modeling approaches, including ordinal logistic regression[192], and regression tree models[193].

The influence of exposures that might exert intermediary or confounding effects on the outcomes (e.g. knee OA severity, radiographic knee alignment, use of analgesia, and BMI) will be tested by performing stratified analyses and by entering them as covariates in the linear regression models (Table 4). The ways in which all these variables might interact are complex so we will interpret our results in respect of differentiating confounding from an intermediary role on the basis of biologically based a priori hypotheses.

## *10. Investigator's Regulatory Obligations*

### **10.1 INSTITUTIONAL REVIEW BOARD**

The study protocol, participant informed consent form, and any recruitment materials will be reviewed and approved by the Tufts Medical Center IRB prior to the start of participant recruitment.

### **10.2 TUFTS MEDICAL CENTER RHEUMATOLOGY OUTPATIENT CLINIC**

The study will occur at the Tufts Medical Center's Adult Rheumatology Outpatient Clinic, Tufts Clinical and Translational Research Center and the Boston University Center for Biomedical Imaging.

### **10.3 DATA AND SAFETY MONITORING BOARD (DSMB)**

NIAMS has developed guidelines for data safety monitoring board activities for NIAMS funded studies and has appointed KAI to assemble and administer a DSMB for this trial. Tufts Medical Center Division of Rheumatology will work with NIAMS and KAI Research, Inc in the formation of and procedures for data and safety monitoring.

DSMB meeting minutes will be copied and forwarded to the Tufts Medical Center IRB.

### **10.4 RECORDS/DATA RETENTION**

Research records and data will be kept for a minimum of 7 years after study completion. This requirement is as outlined in the Policies and Operations Manual for the Institutional Review Board of Tufts Medical Center and Tufts University Health Sciences (Version date January 7, 2009).

## 11. References

### REFERENCES

1. Oliveria SA, Felson DT, Reed JI, Cirillo PA, Walker AM: **Incidence of symptomatic hand, hip, and knee osteoarthritis among patients in a health maintenance organization.** *Arthritis Rheum* 1995, **38**:1134-1141.
2. Guccione AA, Felson DT, Anderson JJ, Anthony JM, Zhang Y, Wilson PW, Kelly-Hayes M, Wolf PA, Kreger BE, Kannel WB: **The effects of specific medical conditions on the functional limitations of elders in the Framingham Study.** *Am J Public Health* 1994, **84**:351-358.
3. Mankin HJ: **Clinical features of osteoarthritis.** In *Textbook of Rheumatology*. 4th edition. Edited by Kelly WN, Harris EDJ, Ruddy S, Sledge CB. Philadelphia, PA: W.B. Saunders Co.; 1993: 1374-1384
4. **The Incidence and Prevalence Database for Procedures.** In *The Incidence and Prevalence Database for Procedures*. Sunnyvale, CA: Timely Data Resources; 1995: 592-596
5. Kosorok MR, Omenn GS, Diehr P, Koepsell TD, Patrick DL: **Restricted activity days among older adults.** *Am J Public Health* 1992, **82**:1263-1267.
6. Kramer JS, Yelin EH, Epstein WV: **Social and economic impacts of four musculoskeletal conditions. A study using national community-based data.** *Arthritis Rheum* 1983, **26**:901-907.
7. Hough AJ: **Pathology of osteoarthritis.** In *Arthritis and Allied Conditions*. 13 edition. Edited by Koopman WJ. Baltimore, MD: Williams & Wilkins; 1997: 1945-1968
8. Myers SL, Brandt KD, Ehlich JW, Braunstein EM, Shelbourne KD, Heck DA, Kalasinski LA: **Synovial inflammation in patients with early osteoarthritis of the knee.** *J Rheumatol* 1990, **17**:1662-1669.
9. Smith MD, Triantafillou S, Parker A, Youssef PP, Coleman M: **Synovial membrane inflammation and cytokine production in patients with early osteoarthritis.** *J Rheumatol* 1997, **24**:365-371.
10. Schumacher HR, Jr.: **Synovial inflammation, crystals and osteoarthritis.** *J Rheumatol* 1995, **22**:101-103.
11. Gordon GV, Villanueva T, Schumacher HR, Gohel V: **Autopsy study correlating degree of osteoarthritis, synovitis and evidence of articular calcification.** *J Rheumatol* 1984, **11**:681-686.
12. Fernandez-Madrid F, Karvonen RL, Teitge RA, Miller PR, An T, Nengendank WG: **Synovial thickening detected by MR imaging in osteoarthritis of the knee confirmed by biopsy as synovitis.** *Magn Reson Imaging* 1995, **13**:177-183.
13. Ayral X, Pickering EH, Woodworth TG, Mackillop N, Dougados M: **Synovitis: a potential predictive factor of structural progression of medial tibiofemoral knee osteoarthritis -- results of a 1 year longitudinal arthroscopic study in 422 patients.** *Osteoarthritis Cartilage* 2005, **13**:361-367.
14. Lohmander LS, Felson D: **Can we identify a 'high risk' patient profile to determine who will experience rapid progression of osteoarthritis?** *Osteoarthritis Cartilage* 2004, **12 Suppl A**:S49-52.
15. Hill CL, Hunter DJ, Niu J, Clancy M, Guermazi A, Genant H, Gale D, Grainger A, Conaghan P, Felson DT: **Synovitis detected on magnetic resonance imaging and its relation to pain and cartilage loss in knee osteoarthritis.** *Ann Rheum Dis* 2007, **66**:1599-1603.
16. Hill CL, Gale DG, Chaisson CE, Skinner K, Kazis L, Gale ME, Felson DT: **Knee effusions, popliteal cysts, and synovial thickening: association with knee pain in osteoarthritis.** *J Rheumatol* 2001, **28**:1330-1337.

17. Loeuille D, Chary-Valckenaere I, Champigneulle J, Rat AC, Toussaint F, Pinzano-Watrin A, Goebel JC, Mainard D, Blum A, Pourel J, et al: **Macroscopic and microscopic features of synovial membrane inflammation in the osteoarthritic knee: correlating magnetic resonance imaging findings with disease severity.** *Arthritis Rheum* 2005, **52**:3492-3501.
18. van den Berg WB, van der Kraan PM, van Beuningen HM: **Synovial mediators of cartilage damage and repair in osteoarthritis.** In *Osteoarthritis*. Second edition. Edited by Brandt KD, Doherty M, Lohmander LS. Oxford: Oxford University Press; 2003: 147-155
19. Pelletier JP, Raynauld JP, Abram F, Haraoui B, Choquette D, Martel-Pelletier J: **A new non-invasive method to assess synovitis severity in relation to symptoms and cartilage volume loss in knee osteoarthritis patients using MRI.** *Osteoarthritis Cartilage* 2008, **16 Suppl 3**:S8-13.
20. Sandy JD: **Proteolytic degradation of normal and osteoarthritic cartilage matrix.** In *Osteoarthritis*. Second edition. Edited by Brandt KD, Doherty M, Lohmander LS. Oxford: Oxford University Press; 2003: 82-92
21. Jay GD, Elsaid KA, Zack J, Robinson K, Trespacios F, Cha CJ, Chichester CO: **Lubricating ability of aspirated synovial fluid from emergency department patients with knee joint synovitis.** *J Rheumatol* 2004, **31**:557-564.
22. Jones AR, Flannery CR: **Bioregulation of lubricin expression by growth factors and cytokines.** *Eur Cell Mater* 2007, **13**:40-45; discussion 45.
23. Elsaid KA, Jay GD, Chichester CO: **Reduced expression and proteolytic susceptibility of lubricin/superficial zone protein may explain early elevation in the coefficient of friction in the joints of rats with antigen-induced arthritis.** *Arthritis Rheum* 2007, **56**:108-116.
24. Probert L, Plows D, Kontogeorgos G, Kollias G: **The type I interleukin-1 receptor acts in series with tumor necrosis factor (TNF) to induce arthritis in TNF-transgenic mice.** *Eur J Immunol* 1995, **25**:1794-1797.
25. van de Loo FA, Joosten LA, van Lent PL, Arntz OJ, van den Berg WB: **Role of interleukin-1, tumor necrosis factor alpha, and interleukin-6 in cartilage proteoglycan metabolism and destruction. Effect of in situ blocking in murine antigen- and zymosan-induced arthritis.** *Arthritis Rheum* 1995, **38**:164-172.
26. Deleuran BW, Chu CQ, Field M, Brennan FM, Mitchell T, Feldmann M, Maini RN: **Localization of tumor necrosis factor receptors in the synovial tissue and cartilage-pannus junction in patients with rheumatoid arthritis. Implications for local actions of tumor necrosis factor alpha.** *Arthritis Rheum* 1992, **35**:1170-1178.
27. Farahat MN, Yanni G, Poston R, Panayi GS: **Cytokine expression in synovial membranes of patients with rheumatoid arthritis and osteoarthritis.** *Ann Rheum Dis* 1993, **52**:870-875.
28. Pelletier JP, McCollum R, Cloutier JM, Martel-Pelletier J: **Synthesis of metalloproteases and interleukin 6 (IL-6) in human osteoarthritic synovial membrane is an IL-1 mediated process.** *J Rheumatol Suppl* 1995, **43**:109-114.
29. McInnes IB, Leung BP, Field M, Wei XQ, Huang FP, Sturrock RD, Kinninmonth A, Weidner J, Mumford R, Liew FY: **Production of nitric oxide in the synovial membrane of rheumatoid and osteoarthritis patients.** *J Exp Med* 1996, **184**:1519-1524.
30. Pelletier JP, Faure MP, DiBattista JA, Wilhelm S, Visco D, Martel-Pelletier J: **Coordinate synthesis of stromelysin, interleukin-1, and oncogene proteins in experimental osteoarthritis. An immunohistochemical study.** *Am J Pathol* 1993, **142**:95-105.



31. Okada Y, Shinmei M, Tanaka O, Naka K, Kimura A, Nakanishi I, Bayliss MT, Iwata K, Nagase H: **Localization of matrix metalloproteinase 3 (stromelysin) in osteoarthritic cartilage and synovium.** *Lab Invest* 1992, **66**:680-690.
32. Clark IM, Powell LK, Ramsey S, Hazleman BL, Cawston TE: **The measurement of collagenase, tissue inhibitor of metalloproteinases (TIMP), and collagenase-TIMP complex in synovial fluids from patients with osteoarthritis and rheumatoid arthritis.** *Arthritis Rheum* 1993, **36**:372-379.
33. Vankemmelbeke MN, Hohen I, Wilson AG, Ilic MZ, Handley CJ, Kelner GS, Clark M, Liu C, Maki RA, Burnett D, Buttle DJ: **Expression and activity of ADAMTS-5 in synovium.** *Eur J Biochem* 2001, **268**:1259-1268.
34. Mengshol JA, Vincenti MP, Brinckerhoff CE: **IL-1 induces collagenase-3 (MMP-13) promoter activity in stably transfected chondrocytic cells: requirement for Runx-2 and activation by p38 MAPK and JNK pathways.** *Nucleic Acids Res* 2001, **29**:4361-4372.
35. Mengshol JA, Vincenti MP, Coon CI, Barchowsky A, Brinckerhoff CE: **Interleukin-1 induction of collagenase 3 (matrix metalloproteinase 13) gene expression in chondrocytes requires p38, c-Jun N-terminal kinase, and nuclear factor kappaB: differential regulation of collagenase 1 and collagenase 3.** *Arthritis Rheum* 2000, **43**:801-811.
36. DiBattista JA, Martel-Pelletier J, Wosu LO, Sandor T, Antakly T, Pelletier JP: **Glucocorticoid receptor mediated inhibition of interleukin-1 stimulated neutral metalloprotease synthesis in normal human chondrocytes.** *J Clin Endocrinol Metab* 1991, **72**:316-326.
37. Hochberg MC, Perlmutter DL, Hudson JI, Altman RD: **Preferences in the management of osteoarthritis of the hip and knee: results of a survey of community-based rheumatologists in the United States.** *Arthritis Care Res* 1996, **9**:170-176.
38. Hochberg MC, Altman R. D., Brandt K. D., Clark B. M., Dieppe P. A., Griffin M. R., Moskowitz R. W., Schnitzer T. J.: **Guidelines for the medical management of osteoarthritis. Part II. Osteoarthritis of the knee.** American College of Rheumatology. *Arthritis & Rheumatism* 1995, **38**:1541-1546.
39. Jordan KM, Arden NK, Doherty M, Bannwarth B, Bijlsma JW, Dieppe P, Gunther K, Hauselmann H, Herrero-Beaumont G, Kaklamanis P, et al: **EULAR Recommendations 2003: an evidence based approach to the management of knee osteoarthritis: Report of a Task Force of the Standing Committee for International Clinical Studies Including Therapeutic Trials (ESCISIT).** *Ann Rheum Dis* 2003, **62**:1145-1155.
40. Zhang W, Moskowitz RW, Nuki G, Abramson S, Altman RD, Arden N, Bierma-Zeinstra S, Brandt KD, Croft P, Doherty M, et al: **OARSI recommendations for the management of hip and knee osteoarthritis, part I: critical appraisal of existing treatment guidelines and systematic review of current research evidence.** *Osteoarthritis Cartilage* 2007, **15**:981-1000.
41. Zhang W, Moskowitz RW, Nuki G, Abramson S, Altman RD, Arden N, Bierma-Zeinstra S, Brandt KD, Croft P, Doherty M, et al: **OARSI recommendations for the management of hip and knee osteoarthritis, Part II: OARSI evidence-based, expert consensus guidelines.** *Osteoarthritis Cartilage* 2008, **16**:137-162.
42. **Osteoarthritis: national clinical guideline for care and management in adults.** In *Book Osteoarthritis: national clinical guideline for care and management in adults* (Editor ed. eds.). City: Royal College of Physicians; 2008.
43. Cederlof S, Jonson G: **Intraarticular prednisolone injection for osteoarthritis of the knee. A double blind test with placebo.** *Acta Chir Scand* 1966, **132**:532-537.

44. Dieppe PA, Sathapatayavongs B, Jones HE, Bacon PA, Ring EF: **Intra-articular steroids in osteoarthritis.** *Rheumatol Rehabil* 1980, **19**:212-217.
45. Friedman DM, Moore ME: **The efficacy of intraarticular steroids in osteoarthritis: a double-blind study.** *J Rheumatol* 1980, **7**:850-856.
46. Gaffney K, Ledingham J, Perry JD: **Intra-articular triamcinolone hexacetonide in knee osteoarthritis: factors influencing the clinical response.** *Ann Rheum Dis* 1995, **54**:379-381.
47. Jones A, Doherty M: **Intra-articular corticosteroids are effective in osteoarthritis but there are no clinical predictors of response.** *Ann Rheum Dis* 1996, **55**:829-832.
48. Miller JH, White J, Norton TH: **The value of intra-articular injections in osteoarthritis of the knee.** *J Bone Joint Surg Br* 1958, **40-B**:636-643.
49. Pyne D, Ioannou Y, Mootoo R, Bhanji A: **Intra-articular steroids in knee osteoarthritis: a comparative study of triamcinolone hexacetonide and methylprednisolone acetate.** *Clin Rheumatol* 2004, **23**:116-120.
50. Ravaud P, Moulinier L, Giraudeau B, Ayrat X, Guerin C, Noel E, Thomas P, Fautrel B, Mazieres B, Dougados M: **Effects of joint lavage and steroid injection in patients with osteoarthritis of the knee: results of a multicenter, randomized, controlled trial.** *Arthritis Rheum* 1999, **42**:475-482.
51. Raynauld JP, Buckland-Wright C, Ward R, Choquette D, Haraoui B, Martel-Pelletier J, Uthman I, Khy V, Tremblay JL, Bertrand C, Pelletier JP: **Safety and efficacy of long-term intraarticular steroid injections in osteoarthritis of the knee: a randomized, double-blind, placebo-controlled trial.** *Arthritis Rheum* 2003, **48**:370-377.
52. Sambrook PN, Champion GD, Browne CD, Cairns D, Cohen ML, Day RO, Graham S, Handel M, Jaworski R, Kempler S, et al.: **Corticosteroid injection for osteoarthritis of the knee: peripatellar compared to intra-articular route.** *Clin Exp Rheumatol* 1989, **7**:609-613.
53. Smith MD, Wetherall M, Darby T, Esterman A, Slavotinek J, Roberts-Thomson P, Coleman M, Ahern MJ: **A randomized placebo-controlled trial of arthroscopic lavage versus lavage plus intra-articular corticosteroids in the management of symptomatic osteoarthritis of the knee.** *Rheumatology (Oxford)* 2003, **42**:1477-1485.
54. Stein A, Yassouridis A, Szopko C, Helmke K, Stein C: **Intraarticular morphine versus dexamethasone in chronic arthritis.** *Pain* 1999, **83**:525-532.
55. Wright V, Chandler GN, Morison RA, Hartfall SJ: **Intra-articular therapy in osteo-arthritis; comparison of hydrocortisone acetate and hydrocortisone tertiary-butylacetate.** *Ann Rheum Dis* 1960, **19**:257-261.
56. Arroll B, Goodyear-Smith F: **Corticosteroid injections for osteoarthritis of the knee: meta-analysis.** *BMJ* 2004, **328**:869.
57. Bellamy N, Campbell J, Robinson V, Gee T, Bourne R, Wells G: **Intraarticular corticosteroid for treatment of osteoarthritis of the knee.** *Cochrane Database Syst Rev* 2006:CD005328.
58. Haddad IK: **Temporomandibular joint osteoarthrosis. Histopathological study of the effects of intra-articular injection of triamcinolone acetonide.** *Saudi Med J* 2000, **21**:675-679.
59. Wada J, Koshino T, Morii T, Sugimoto K: **Natural course of osteoarthritis of the knee treated with or without intraarticular corticosteroid injections.** *Bull Hosp Jt Dis* 1993, **53**:45-48.
60. Buckland-Wright C: **Protocols for precise radio-anatomical positioning of the tibiofemoral and patellofemoral compartments of the knee.** *Osteoarthritis Cartilage* 1995, **3 Suppl A**:71-80.
61. Buckland-Wright JC, Macfarlane DG, Williams SA, Ward RJ: **Accuracy and precision of joint space width measurements in standard and macroradiographs of osteoarthritic knees.** *Ann Rheum Dis* 1995, **54**:872-880.

62. Brandt KD, Mazzuca SA, Conrozier T, Dacre JE, Peterfy CG, Provvedini D, Ravaud P, Taccoen A, Vignon E: **Which is the best radiographic protocol for a clinical trial of a structure modifying drug in patients with knee osteoarthritis?** *J Rheumatol* 2002, **29**:1308-1320.
63. Seror P, Pluvinage P, d'Andre FL, Benamou P, Attuil G: **Frequency of sepsis after local corticosteroid injection (an inquiry on 1160000 injections in rheumatological private practice in France).** *Rheumatology (Oxford)* 1999, **38**:1272-1274.
64. Weston VC, Jones AC, Bradbury N, Fawthrop F, Doherty M: **Clinical features and outcome of septic arthritis in a single UK Health District 1982-1991.** *Ann Rheum Dis* 1999, **58**:214-219.
65. Berger RG, Yount WJ: **Immediate "steroid flare" from intraarticular triamcinolone hexacetonide injection: case report and review of the literature.** *Arthritis Rheum* 1990, **33**:1284-1286.
66. Gammer W, Broback LG: **Clinical comparison of orgotein and methylprednisolone acetate in the treatment of osteoarthrosis of the knee joint.** *Scand J Rheumatol* 1984, **13**:108-112.
67. Bertouch JV, Meffin PJ, Sallustio BC, Brooks PM: **A comparison of plasma methylprednisolone concentrations following intra-articular injection in patients with rheumatoid arthritis and osteoarthritis.** *Aust N Z J Med* 1983, **13**:583-586.
68. Lazarevic MB, Skosey JL, Djordjevic-Denic G, Swedler WI, Zgradic I, Myones BL: **Reduction of cortisol levels after single intra-articular and intramuscular steroid injection.** *Am J Med* 1995, **99**:370-373.
69. Wellington JE, van Kan BL, Jaitly KD: **Suppression of the hypothalamus-pituitary-adrenal system by intra-articular triamcinolone diacetate.** *J Endocrinol* 1970, **48**:lxxx+.
70. Courtman NH, Weighill FJ: **Systemic tuberculosis in association with intra-articular steroid therapy.** *J R Coll Surg Edinb* 1992, **37**:425.
71. Younes M, Neffati F, Touzi M, Hassen-Zrouer S, Fendri Y, Bejia I, Ben Amor A, Bergaoui N, Najjar MF: **Systemic effects of epidural and intra-articular glucocorticoid injections in diabetic and non-diabetic patients.** *Joint Bone Spine* 2007, **74**:472-476.
72. Black DM, Filak AT: **Hyperglycemia with non-insulin-dependent diabetes following intraarticular steroid injection.** *J Fam Pract* 1989, **28**:462-463.
73. Patrick M, Doherty M: **Facial flushing after intra-articular injection of steroid.** *Br Med J (Clin Res Ed)* 1987, **295**:1380.
74. Jones A, Doherty M: **Intra-articular glucocorticoids and other injection therapies.** In *Osteoarthritis*. Second edition. Edited by Brandt KD, Doherty M, Lohmander LS. Oxford: Oxford University Press; 2003: 277-282
75. Larsson LG: **Anaphylactic shock after i.a. administration of triamcinolone acetate in a 35-year-old female.** *Scand J Rheumatol* 1989, **18**:441-442.
76. Hopper JM, Carter SR: **Anaphylaxis after intra-articular injection of bupivacaine and methylprednisolone.** *J Bone Joint Surg Br* 1993, **75**:505-506.
77. Robinson DE, Harrison-Hansley E, Spencer RF: **Steroid psychosis after an intra-articular injection.** *Ann Rheum Dis* 2000, **59**:927.
78. Salter RB, Gross A, Hall JH: **Hydrocortisone arthropathy--an experimental investigation.** *Can Med Assoc J* 1967, **97**:374-377.
79. Mankin HJ, Conger KA: **The acute effects of intra-articular hydrocortisone on articular cartilage in rabbits.** *J Bone Joint Surg Am* 1966, **48**:1383-1388.
80. Chandler GN, Wright V: **Deleterious effect of intra-articular hydrocortisone.** *Lancet* 1958, **2**:661-663.

81. Chandler GN, Jones DT, Wright V, Hartfall SJ: **Charcot's arthropathy following intra-articular hydrocortisone.** *Br Med J* 1959, **1**:952-953.
82. Chunekamrai S, Krook LP, Lust G, Maylin GA: **Changes in articular cartilage after intra-articular injections of methylprednisolone acetate in horses.** *Am J Vet Res* 1989, **50**:1733-1741.
83. Mankin HJ, Conger KA: **The effect of cortisol on articular cartilage of rabbits. I. Effect of a single dose of cortisol on glycine-C-14 incorporation.** *Lab Invest* 1966, **15**:794-800.
84. Farquhar T, Todhunter RJ, Fubini SL, Burton-Wurster N, Lust G: **Effect of methylprednisolone and mechanical loading on canine articular cartilage in explant culture.** *Osteoarthritis Cartilage* 1996, **4**:55-62.
85. Fubini SL, Todhunter RJ, Burton-Wurster N, Vernier-Singer M, MacLeod JN: **Corticosteroids alter the differentiated phenotype of articular chondrocytes.** *J Orthop Res* 2001, **19**:688-695.
86. Murphy DJ, Todhunter RJ, Fubini SL, Vernier-Singer M, Straubinger RK, Lust G: **The effects of methylprednisolone on normal and monocyte-conditioned medium-treated articular cartilage from dogs and horses.** *Vet Surg* 2000, **29**:546-557.
87. Pelletier JP, Cloutier JM, Martel-Pelletier J: **In vitro effects of tiaprofenic acid, sodium salicylate and hydrocortisone on the proteoglycan metabolism of human osteoarthritic cartilage.** *J Rheumatol* 1989, **16**:646-655.
88. Behrens F, Shepard N, Mitchell N: **Alterations of rabbit articular cartilage by intra-articular injections of glucocorticoids.** *J Bone Joint Surg Am* 1975, **57**:70-76.
89. Moskowitz RW, Davis W, Sammarco J, Mast W, Chase SW: **Experimentally induced corticosteroid arthropathy.** *Arthritis Rheum* 1970, **13**:236-243.
90. Lewandowski B, Bernacka K, Cylwik B, Duda D, Klimiuk PA: **Piroxicam and poststeroidal damage of articular cartilage.** *Rocz Akad Med Bialymst* 1995, **40**:396-407.
91. Papacrhistou G, Anagnostou S, Katsorhis T: **The effect of intraarticular hydrocortisone injection on the articular cartilage of rabbits.** *Acta Orthop Scand Suppl* 1997, **275**:132-134.
92. Gogia PP, Brown M, al-Obaidi S: **Hydrocortisone and exercise effects on articular cartilage in rats.** *Arch Phys Med Rehabil* 1993, **74**:463-467.
93. Shoemaker RS, Bertone AL, Martin GS, McIlwraith CW, Roberts ED, Pechman R, Kearney MT: **Effects of intra-articular administration of methylprednisolone acetate on normal articular cartilage and on healing of experimentally induced osteochondral defects in horses.** *Am J Vet Res* 1992, **53**:1446-1453.
94. Foland JW, McIlwraith CW, Trotter GW, Powers BE, Lamar CH: **Effect of betamethasone and exercise on equine carpal joints with osteochondral fragments.** *Vet Surg* 1994, **23**:369-376.
95. Williams JM, Brandt KD: **Triamcinolone hexacetonide protects against fibrillation and osteophyte formation following chemically induced articular cartilage damage.** *Arthritis Rheum* 1985, **28**:1267-1274.
96. Pelletier JP, Martel-Pelletier J: **Protective effects of corticosteroids on cartilage lesions and osteophyte formation in the Pond-Nuki dog model of osteoarthritis.** *Arthritis Rheum* 1989, **32**:181-193.
97. Pelletier JP, Mineau F, Raynauld JP, Woessner JF, Jr., Gunja-Smith Z, Martel-Pelletier J: **Intraarticular injections with methylprednisolone acetate reduce osteoarthritic lesions in parallel with chondrocyte stromelysin synthesis in experimental osteoarthritis.** *Arthritis Rheum* 1994, **37**:414-423.

98. Pelletier JP, DiBattista JA, Raynauld JP, Wilhelm S, Martel-Pelletier J: **The in vivo effects of intraarticular corticosteroid injections on cartilage lesions, stromelysin, interleukin-1, and oncogene protein synthesis in experimental osteoarthritis.** *Lab Invest* 1995, **72**:578-586.
99. Larsson E, Erlandsson Harris H, Larsson A, Mansson B, Saxne T, Klareskog L: **Corticosteroid treatment of experimental arthritis retards cartilage destruction as determined by histology and serum COMP.** *Rheumatology (Oxford)* 2004, **43**:428-434.
100. Pelletier JP, Cloutier JM, Martel-Pelletier J: **In vitro effects of NSAIDs and corticosteroids on the synthesis and secretion of interleukin 1 by human osteoarthritic synovial membranes.** *Agents Actions Suppl* 1993, **39**:181-193.
101. Panagides J, Landes MJ, Sloboda AE: **Destruction of articular cartilage by arthritic synovium in vitro: mechanism of breakdown and effect of indomethacin and prednisolone.** *Agents Actions* 1980, **10**:22-30.
102. Sedgwick AD, Sin YM, Moore AR, Edwards JC, Willoughby DA: **Effects of local administration of hydrocortisone on cartilage degradation in vivo.** *Ann Rheum Dis* 1984, **43**:418-420.
103. Steinberg J, Tsukamoto S, Sledge CB: **A tissue culture model of cartilage breakdown in rheumatoid arthritis. III. Effects of antirheumatic drugs.** *Arthritis Rheum* 1979, **22**:877-885.
104. Joosten LA, Helsen MM, van den Berg WB: **Protective effect of rimexolone on cartilage damage in arthritic mice: a comparative study with triamcinolone hexacetonide.** *Agents Actions* 1990, **31**:135-142.
105. Radin EL, Martin RB, Burr DB, Caterson B, Boyd RD, Goodwin C: **Effects of mechanical loading on the tissues of the rabbit knee.** *J Orthop Res* 1984, **2**:221-234.
106. Hayes WC, Swenson LW, Jr., Schurman DJ: **Axisymmetric finite element analysis of the lateral tibial plateau.** *J Biomech* 1978, **11**:21-33.
107. Clark JM, Huber JD: **The structure of the human subchondral plate.** *J Bone Joint Surg Br* 1990, **72**:866-873.
108. Hoshino A, Wallace WA: **Impact-absorbing properties of the human knee.** *J Bone Joint Surg Br* 1987, **69**:807-811.
109. Westacott C: **Subchondral bone in the pathogenesis of osteoarthritis.** In *Osteoarthritis*. 2nd edition. Edited by Brandt KD, Doherty M, Lohmander LS. Oxford: University Press; 2003
110. Grynblas MD, Alpert B, Katz I, Lieberman I, Pritzker KP: **Subchondral bone in osteoarthritis.** *Calcif Tissue Int* 1991, **49**:20-26.
111. Ding M, Odgaard A, Hvid I: **Changes in the three-dimensional microstructure of human tibial cancellous bone in early osteoarthritis.** *J Bone Joint Surg Br* 2003, **85**:906-912.
112. Kamibayashi L, Wyss UP, Cooke TD, Zee B: **Trabecular microstructure in the medial condyle of the proximal tibia of patients with knee osteoarthritis.** *Bone* 1995, **17**:27-35.
113. Kamibayashi L, Wyss UP, Cooke TD, Zee B: **Changes in mean trabecular orientation in the medial condyle of the proximal tibia in osteoarthritis.** *Calcif Tissue Int* 1995, **57**:69-73.
114. Milgram JW: **Morphologic alterations of the subchondral bone in advanced degenerative arthritis.** *Clin Orthop Relat Res* 1983:293-312.
115. Dieppe P, Cushnaghan J, Young P, Kirwan J: **Prediction of the progression of joint space narrowing in osteoarthritis of the knee by bone scintigraphy.** *Ann Rheum Dis* 1993, **52**:557-563.
116. Mazuza SA, Brandt KD, Schauwecker DS, Buckwalter KA, Katz BP, Meyer JM, Lane KA: **Bone scintigraphy is not a better predictor of progression of knee osteoarthritis than Kellgren and Lawrence grade.** *J Rheumatol* 2004, **31**:329-332.

117. Pessis E, Drape JL, Ravaud P, Chevrot A, Dougados M, Ayrat X: **Assessment of progression in knee osteoarthritis: results of a 1 year study comparing arthroscopy and MRI.** *Osteoarthritis Cartilage* 2003, **11**:361-369.
118. Felson DT, McLaughlin S, Goggins J, LaValley MP, Gale ME, Totterman S, Li W, Hill C, Gale D: **Bone marrow edema and its relation to progression of knee osteoarthritis.** *Ann Intern Med* 2003, **139**:330-336.
119. Zhang Y, Hannan MT, Chaisson CE, McAlindon TE, Evans SR, Aliabadi P, Levy D, Felson DT: **Bone mineral density and risk of incident and progressive radiographic knee osteoarthritis in women: the Framingham Study.** *J Rheumatol* 2000, **27**:1032-1037.
120. Hart DJ, Cronin C, Daniels M, Worthy T, Doyle DV, Spector TD: **The relationship of bone density and fracture to incident and progressive radiographic osteoarthritis of the knee: the Chingford Study.** *Arthritis Rheum* 2002, **46**:92-99.
121. Bruyere O, Dardenne C, Lejeune E, Zegels B, Pahaut A, Richy F, Seidel L, Ethgen O, Henrotin Y, Reginster JY: **Subchondral tibial bone mineral density predicts future joint space narrowing at the medial femoro-tibial compartment in patients with knee osteoarthritis.** *Bone* 2003, **32**:541-545.
122. Reid IR: **Glucocorticoid effects on bone.** *J Clin Endocrinol Metab* 1998, **83**:1860-1862.
123. Conaghan P, D'Agostino MA, Ravaud P, Baron G, Le Bars M, Grassi W, Martin-Mola E, Wakefield R, Brasseur JL, So A, et al: **EULAR report on the use of ultrasonography in painful knee osteoarthritis. Part 2: exploring decision rules for clinical utility.** *Ann Rheum Dis* 2005, **64**:1710-1714.
124. Grobbelaar N, Bouffard JA: **Sonography of the knee, a pictorial review.** *Semin Ultrasound CT MR* 2000, **21**:231-274.
125. D'Agostino MA, Conaghan P, Le Bars M, Baron G, Grassi W, Martin-Mola E, Wakefield R, Brasseur JL, So A, Backhaus M, et al: **EULAR report on the use of ultrasonography in painful knee osteoarthritis. Part 1: prevalence of inflammation in osteoarthritis.** *Ann Rheum Dis* 2005, **64**:1703-1709.
126. Kristoffersen H, Torp-Pedersen S, Terslev L, Qvistgaard E, Holm CC, Ellegaard K, Bliddal H: **Indications of inflammation visualized by ultrasound in osteoarthritis of the knee.** *Acta Radiol* 2006, **47**:281-286.
127. Wakefield RJ, Green MJ, Marzo-Ortega H, Conaghan PG, Gibbon WW, McGonagle D, Proudman S, Emery P: **Should oligoarthritis be reclassified? Ultrasound reveals a high prevalence of subclinical disease.** *Ann Rheum Dis* 2004, **63**:382-385.
128. Stegbauer J, Rump LC, Weiner SM: **Sites of inflammation in painful rheumatoid shoulder assessed by musculoskeletal ultrasound and power Doppler sonography.** *Rheumatol Int* 2008, **28**:459-465.
129. Iagnocco A, Filippucci E, Perella C, Ceccarelli F, Cassara E, Alessandri C, Sabatini E, Grassi W, Valesini G: **Clinical and ultrasonographic monitoring of response to adalimumab treatment in rheumatoid arthritis.** *J Rheumatol* 2008, **35**:35-40.
130. Iagnocco A, Perella C, Naredo E, Meenagh G, Ceccarelli F, Tripodo E, Basili S, Valesini G: **Etanercept in the treatment of rheumatoid arthritis: clinical follow-up over one year by ultrasonography.** *Clin Rheumatol* 2008, **27**:491-496.
131. Karim Z, Quinn MA, Wakefield RJ, Brown AK, Green MJ, Hensor EM, Conaghan PG, Emery P: **Response to intramuscular methyl prednisolone in inflammatory hand pain: evidence for a targeted clinical, ultrasonographic and therapeutic approach.** *Ann Rheum Dis* 2007, **66**:690-692.

132. Tarhan S, Unlu Z: **Magnetic resonance imaging and ultrasonographic evaluation of the patients with knee osteoarthritis: a comparative study.** *Clin Rheumatol* 2003, **22**:181-188.
133. Song IH, Althoff CE, Hermann KG, Scheel AK, Knetsch T, Schoenharting M, Werner C, Burmester GR, Backhaus M: **Knee Osteoarthritis Efficacy of a new method of contrast-enhanced musculoskeletal ultrasonography in detection of synovitis in patients with knee osteoarthritis in comparison with magnetic resonance imaging.** *Ann Rheum Dis* 2007.
134. Walther M, Harms H, Krenn V, Radke S, Faehndrich TP, Gohlke F: **Correlation of power Doppler sonography with vascularity of the synovial tissue of the knee joint in patients with osteoarthritis and rheumatoid arthritis.** *Arthritis Rheum* 2001, **44**:331-338.
135. Takase K, Ideguchi H, Ohno S, Nagashima Y, Ihata A, Takeno M, Ishigatsubo Y: **Comparison Of Ultrasonography And MRI Assessment Of Synovitis With Histopathological Findings In Patients With Osteoarthritis And Rheumatoid Arthritis.** *Arthritis & Rheumatism* 2008, **58**:S407.
136. d'Anjou MA, Troncy E, Moreau M, Abram F, Raynauld JP, Martel-Pelletier J, Pelletier JP: **Response to the Letter to the Editor by Roemer and collaborators entitled "MRI based semi-quantitative assessment of subchondral bone marrow lesions in osteoarthritis research" concerning the article published by d'Anjou et al. entitled "Temporal assessment of bone marrow lesions on magnetic resonance imaging in a canine model of knee osteoarthritis: impact of sequence selection."** *Osteoarthritis Cartilage* 2008.
137. Pelletier JP, Raynauld JP, Abram F, Haraoui B, Choquette D, Martel-Pelletier J: **Response to the Letter to the Editor by Roemer and collaborators entitled "Semiquantitative assessment of synovitis in osteoarthritis on non contrast-enhanced MRI" concerning the article published by Pelletier et al. entitled "A new non-invasive method to assess synovitis severity in relation to symptoms and cartilage volume loss in knee osteoarthritis patients using MRI".** *Osteoarthritis Cartilage* 2008, **17**:822-824.
138. Roemer FW, Hunter DJ, Guermazi A: **Semiquantitative assessment of synovitis in osteoarthritis on non contrast-enhanced MRI.** *Osteoarthritis Cartilage* 2009, **17**:820-821; author reply 822-824.
139. Ostergaard M, Stoltenberg M, Gideon P, Sorensen K, Henriksen O, Lorenzen I: **Changes in synovial membrane and joint effusion volumes after intraarticular methylprednisolone. Quantitative assessment of inflammatory and destructive changes in arthritis by MRI.** *J Rheumatol* 1996, **23**:1151-1161.
140. Ostergaard M, Stoltenberg M, Henriksen O, Lorenzen I: **The accuracy of MRI-determined synovial membrane and joint effusion volumes in arthritis. A comparison of pre- and post-aspiration volumes.** *Scand J Rheumatol* 1995, **24**:305-311.
141. Tan AL, Wakefield RJ, Conaghan PG, Emery P, McGonagle D: **Imaging of the musculoskeletal system: magnetic resonance imaging, ultrasonography and computed tomography.** *Best Pract Res Clin Rheumatol* 2003, **17**:513-528.
142. Marra MD, Roemer FW, Crema MD, Niu J, Zhang Y, Javaid MK, Torner JC, Lewis CE, Felson DT, Guermazi A: **Peripatellar synovitis in osteoarthritis: comparison of non-enhanced and enhanced magnetic resonance imaging and its association with peripatellar knee pain. The MOST study.** *Osteoarthritis and Cartilage* 2008, **16** (Suppl 4):S167.
143. Kay J: **Nephrogenic systemic fibrosis: a new concern for rheumatologists.** *Nat Clin Pract Rheumatol* 2008, **4**:445.

144. Maschek S, Wirth W, Wyman BT, Buck RJ, Hudelmaier M, Hellio Le Graverand M, Eckstein F: **Impact of the contrast agent gadopentate dimeglumine on quantitative magnetic resonance imaging of cartilage morphology.** *Osteoarthritis and Cartilage* 2008, **16** (Supplement 4):S174.
145. Beuf O, Ghosh S, Newitt DC, Link TM, Steinbach L, Ries M, Lane N, Majumdar S: **Magnetic resonance imaging of normal and osteoarthritic trabecular bone structure in the human knee.** *Arthritis Rheum* 2002, **46**:385-393.
146. McAlindon TE, Watt I, McCrae F, Goddard P, Dieppe P. A.: **Magnetic resonance imaging in osteoarthritis of the knee: correlation with radiographic and scintigraphic findings.** *Annals of the Rheumatic Diseases* 1991, **50**:14-19.
147. Adams JG, McAlindon T, Dimasi M, Carey J, Eustace S: **Contribution of meniscal extrusion and cartilage loss to joint space narrowing in osteoarthritis.** *Clin Radiol* 1999, **54**:502-506.
148. Eckstein F, Cicuttini F, Raynauld JP, Waterton JC, Peterfy C: **Magnetic resonance imaging (MRI) of articular cartilage in knee osteoarthritis (OA): morphological assessment.** *Osteoarthritis Cartilage* 2006.
149. Cicuttini F, Forbes A, Morris K, Darling S, Bailey M, Stuckey S: **Gender differences in knee cartilage volume as measured by magnetic resonance imaging.** *Osteoarthritis Cartilage* 1999, **7**:265-271.
150. Cohen ZA, McCarthy DM, Kwak SD, Legrand P, Fogarasi F, Ciaccio EJ, Ateshian GA: **Knee cartilage topography, thickness, and contact areas from MRI: in-vitro calibration and in-vivo measurements.** *Osteoarthritis Cartilage* 1999, **7**:95-109.
151. Eckstein F, Gavazzeni A, Sittek H, Haubner M, Losch A, Milz S, Englmeier KH, Schulte E, Putz R, Reiser M: **Determination of knee joint cartilage thickness using three-dimensional magnetic resonance chondro-crassometry (3D MR-CCM).** *Magn Reson Med* 1996, **36**:256-265.
152. Eckstein F, Adam C, Sittek H, Becker C, Milz S, Schulte E, Reiser M, Putz R: **Non-invasive determination of cartilage thickness throughout joint surfaces using magnetic resonance imaging.** *J Biomech* 1997, **30**:285-289.
153. Eckstein F, Stammberger T, Priebsch J, Englmeier KH, Reiser M: **Effect of gradient and section orientation on quantitative analysis of knee joint cartilage.** *J Magn Reson Imaging* 2000, **11**:469-470.
154. Kladny B, Bail H, Swoboda B, Schiwy-Bochat H, Beyer WF, Weseloh G: **Cartilage thickness measurement in magnetic resonance imaging.** *Osteoarthritis Cartilage* 1996, **4**:181-186.
155. Peterfy CG, van Dijke CF, Janzen DL, Gluer CC, Namba R, Majumdar S, Lang P, Genant HK: **Quantification of articular cartilage in the knee with pulsed saturation transfer subtraction and fat-suppressed MR imaging: optimization and validation.** *Radiology* 1994, **192**:485-491.
156. Piplani MA, Disler DG, McCauley TR, Holmes TJ, Cousins JP: **Articular cartilage volume in the knee: semiautomated determination from three-dimensional reformations of MR images.** *Radiology* 1996, **198**:855-859.
157. Burgkart R, Glaser C, Hyhlik-Durr A, Englmeier KH, Reiser M, Eckstein F: **Magnetic resonance imaging-based assessment of cartilage loss in severe osteoarthritis: accuracy, precision, and diagnostic value.** *Arthritis Rheum* 2001, **44**:2072-2077.
158. Raynauld JP, Kauffman C, Berthiaume JP, Beaudoin G, DeGuise J, Martel-Pelletier J, Pelletier JP: **Validation of a quantification imaging system for the normal and the osteoarthritis knee.** *Arthritis Rheum* 2001, **44**.
159. Cicuttini FM, Wluka AE, Stuckey SL: **Tibial and femoral cartilage changes in knee osteoarthritis.** *Ann Rheum Dis* 2001, **60**:977-980.



160. Wluka AE, Davis SR, Bailey M, Stuckey SL, Cicuttini FM: **Users of oestrogen replacement therapy have more knee cartilage than non-users.** *Ann Rheum Dis* 2001, **60**:332-336.
161. Eckstein F, Lemberger B, Stammberger T, Englmeier KH, Reiser M: **Patellar cartilage deformation in vivo after static versus dynamic loading.** *J Biomech* 2000, **33**:819-825.
162. Waterton JC, Solloway S, Foster JE, Keen MC, Gandy S, Middleton BJ, Maciewicz RA, Watt I, Dieppe PA, Taylor CJ: **Diurnal variation in the femoral articular cartilage of the knee in young adult humans.** *Magn Reson Med* 2000, **43**:126-132.
163. Wluka AE, Wolfe R, Stuckey S, Cicuttini FM: **How does tibial cartilage volume relate to symptoms in subjects with knee osteoarthritis?** *Ann Rheum Dis* 2004, **63**:264-268.
164. Cicuttini FM, Jones G, Forbes A, Wluka AE: **Rate of cartilage loss at two years predicts subsequent total knee arthroplasty: a prospective study.** *Ann Rheum Dis* 2004.
165. Peterfy CG, White DL, Zhao J, Van Dijke CF, Genant HK: **Longitudinal measurement of knee articular cartilage volume in osteoarthritis.** *Arthritis Rheum* 1998, **41**.
166. Berthiaume MJ, DeGuise J, Gagnon R, Bloch D, Altman DG, Martel-Pelletier J, Choquette D, Cline G, Meyer J, Pelletier JP: **Knee osteoarthritis progression evaluated by magnetic resonance imaging and a novel quantification software tool.** *Arthritis Rheum* 2000, **43** (Suppl 9):S399.
167. Lynch JA, Zaim S, Zhao J, Peterfy CG, Genant HK: **Cartilage lesion development following meniscal surgery measured from serial MRI of the knee using image registration and segmentation.** *Arthritis Rheum* 2001, **2001**.
168. Wluka AE, Stuckey S, Snaddon J, Cicuttini FM: **The determinants of change in tibial cartilage volume in osteoarthritic knees.** *Arthritis Rheum* 2002, **46**:2065-2072.
169. Raynauld JP, Pelletier JP, Beaudoin G, Berthiaume MJ, DeGuise J, Bloch DA, Altman RD, Hochberg MC, Cline G, Buckland-Wright C, et al: **A two-year study in osteoarthritis patients following the progression of disease by magnetic resonance imaging using a novel quantification system.** *Arthritis Rheum* 2002, **46**:S311.
170. Gandy SJ, Dieppe PA, Keen MC, Maciewicz RA, Watt I, Waterton JC: **No loss of cartilage volume over three years in patients with knee osteoarthritis as assessed by magnetic resonance imaging.** *Osteoarthritis Cartilage* 2002, **10**:929-937.
171. Cicuttini FM, Forbes A, Yuanyuan W, Rush G, Stuckey SL: **Rate of knee cartilage loss after partial meniscectomy.** *J Rheumatol* 2002, **29**:1954-1956.
172. Raynauld JP, Martel-Pelletier J, Berthiaume MJ, Beaudoin G, Choquette D, Haraoui B, Tannenbaum H, Meyer JM, Beary JF, Cline GA, Pelletier JP: **Long term evaluation of disease progression through the quantitative magnetic resonance imaging of symptomatic knee osteoarthritis patients: correlation with clinical symptoms and radiographic changes.** *Arthritis Res Ther* 2005, **8**:R21.
173. Berthiaume MJ, Raynauld JP, Martel-Pelletier J, Labonte F, Beaudoin G, Bloch DA, Choquette D, Haraoui B, Altman RD, Hochberg M, et al: **Meniscal tear and extrusion are strongly associated with progression of symptomatic knee osteoarthritis as assessed by quantitative magnetic resonance imaging.** *Ann Rheum Dis* 2005, **64**:556-563.
174. Raynauld JP, Martel-Pelletier J, Berthiaume MJ, Labonte F, Beaudoin G, de Guise JA, Bloch DA, Choquette D, Haraoui B, Altman RD, et al: **Quantitative magnetic resonance imaging evaluation of knee osteoarthritis progression over two years and correlation with clinical symptoms and radiologic changes.** *Arthritis Rheum* 2004, **50**:476-487.

175. Wildy KS, Zaim S, Peterfy CG, Newman AB, Kritchevsky S, Nevitt MC: **Reliability of the whole-organ review MRI scoring (WORMS) method for knee osteoarthritis (OA) in a multicenter study.** *Arthritis Rheum* 2001, **44**.
176. Biswal S, Hastie T, Andriacchi TP, Bergman GA, Dillingham MF, Lang P: **Risk factors for progressive cartilage loss in the knee: a longitudinal magnetic resonance imaging study in forty-three patients.** *Arthritis Rheum* 2002, **46**:2884-2892.
177. Hunter DJ, March LM, Sambrook PN: **The association of altered subchondral architecture with pain in knee osteoarthritis.** *Arthritis Rheum* 2001, **44**.
178. Peterfy CG, Guermazi A, Zaim S, Tirman PF, Miaux Y, White D, Kothari M, Lu Y, Fye K, Zhao S, Genant HK: **Whole-Organ Magnetic Resonance Imaging Score (WORMS) of the knee in osteoarthritis.** *Osteoarthritis Cartilage* 2004, **12**:177-190.
179. Hunter DJ, Gale D, Grainger G, Lo G, Conaghan P: **Development and reliability of a new scoring system for OA features on MRI of the knee.** *Osteoarthritis & Cartilage* 2005, **13**:241.
180. Watson PJ, Hall LD, Malcolm A, Tyler JA: **Degenerative joint disease in the guinea pig. Use of magnetic resonance imaging to monitor progression of bone pathology.** *Arthritis Rheum* 1996, **39**:1327-1337.
181. Lindsey CT, Narasimhan A, Adolfo JM, Jin H, Steinbach LS, Link T, Ries M, Majumdar S: **Magnetic resonance evaluation of the interrelationship between articular cartilage and trabecular bone of the osteoarthritic knee.** *Osteoarthritis Cartilage* 2004, **12**:86-96.
182. Blumenkrantz G, Lindsey CT, Dunn TC, Jin H, Ries MD, Link TM, Steinbach LS, Majumdar S: **A pilot, two-year longitudinal study of the interrelationship between trabecular bone and articular cartilage in the osteoarthritic knee.** *Osteoarthritis Cartilage* 2004, **12**:997-1005.
183. Majumdar S, Kothari M, Augat P, Newitt DC, Link TM, Lin JC, Lang T, Lu Y, Genant HK: **High-resolution magnetic resonance imaging: three-dimensional trabecular bone architecture and biomechanical properties.** *Bone* 1998, **22**:445-454.
184. Majumdar S, Newitt D, Jergas M, Gies A, Chiu E, Osman D, Keltner J, Keyak J, Genant H: **Evaluation of technical factors affecting the quantification of trabecular bone structure using magnetic resonance imaging.** *Bone* 1995, **17**:417-430.
185. Lancianese SL, Kwok E, Beck CA, Lerner AL: **Predicting regional variations in trabecular bone mechanical properties within the human proximal tibia using MR imaging.** *Bone* 2008, **43**:1039-1046.
186. Majumdar S, Genant HK, Grampp S, Newitt DC, Truong VH, Lin JC, Mathur A: **Correlation of trabecular bone structure with age, bone mineral density, and osteoporotic status: in vivo studies in the distal radius using high resolution magnetic resonance imaging.** *J Bone Miner Res* 1997, **12**:111-118.
187. Lo GH, Schneider E, Majumdar S, Sloane G, Fanella L, Eaton CB, McAlindon TE: **Evaluation of Subchondral Trabecular Bone Using 3 Tesla (3T) Magnetic Resonance Imaging.** *Osteoarthritis and Cartilage* 2006, **14**:S151 (Abstract #P278).
188. In *Book* (Editor ed.^eds.). City: National Heart, Lung, and Blood Institute (US); 2004.
189. Lecouvet FE, Claus J, Schmitz P, Denolin V, Bos C, Vande Berg BC: **Clinical evaluation of automated scan prescription of knee MR images.** *J Magn Reson Imaging* 2009, **29**:141-145.
190. Ornetti P, Brandt K, Hellio-Le Graverand MP, Hochberg M, Hunter DJ, Kloppenburg M, Lane N, Maillefert JF, Mazzuca SA, Spector T, et al: **OARSI-OMERACT definition of relevant radiological progression in hip/knee osteoarthritis.** *Osteoarthritis Cartilage* 2009.
191. Verbeke G, Molenberghs G: *Linear Mixed Models for Longitudinal Data*. New York: Springer-Verlag; 2000.

192. Chang BH, Pocock S: **Analyzing data with clumping at zero. An example demonstration.** *J Clin Epidemiol* 2000, **53**:1036-1043.
193. Zhang H, Holford T, Bracken MB: **A tree-based method of analysis for prospective studies.** *Stat Med* 1996, **15**:37-49.
194. Bauer P, Kohne K: **Evaluation of experiments with adaptive interim analyses.** *Biometrics* 1994, **50**:1029-1041.
195. Hedges LV, Olkin I: *Statistical Methods for Meta-Analysis*. San Diego, CA: Academic Press, Inc.; 1985.
196. Bruce B, Fries JF: **The Stanford Health Assessment Questionnaire: a review of its history, issues, progress, and documentation.** *J Rheumatol* 2003, **30**:167-178.
197. Ingham SL, Moody A, Abhishek A, Doherty SA, Zhang W, Doherty M: **Development and validation of self-reported line drawings for assessment of knee malalignment and foot rotation: a cross-sectional comparative study.** *BMC Med Res Methodol* 2010, **10**:57.
198. McWilliams DF, Doherty S, Maciewicz RA, Muir KR, Zhang W, Doherty M: **Self-reported knee and foot alignments in early adult life and risk of osteoarthritis.** *Arthritis Care Res (Hoboken)* 2010, **62**:489-495.

## Appendix A - Study Timeline

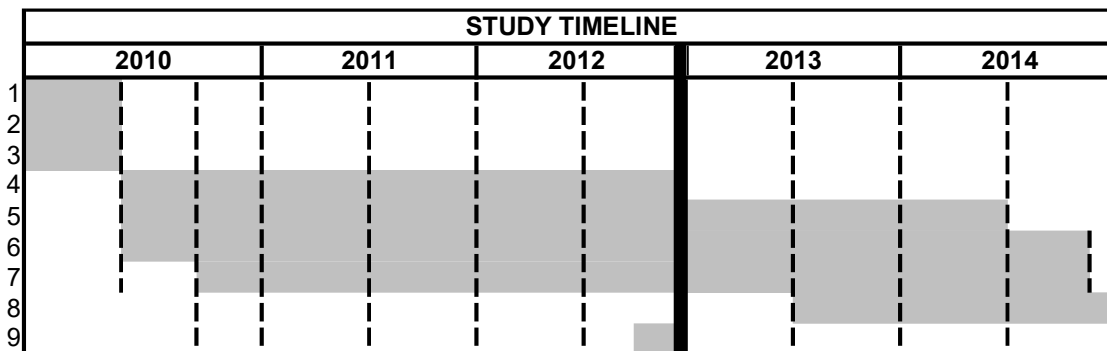

1. Development and testing of the website and electronic data capture systems
2. Construction of the manual of operations, assembly of DSMB, start-up DSMB meeting
3. Acquisition and deployment of study materials (e.g. injection kit, ultrasound scanner, medication)
4. Advertising and recruitment
5. Conduct of the clinical trial
6. Quality control of study DXA scans and MRIs
7. Interpretation, scoring of paired MRIs
8. Data processing, cleaning & analysis; presentation of findings; manuscript preparation
9. **Adaptive interim analysis.** Timeline for subsequent study activities will be truncated if the study is stopped early.

## Appendix B - Schedule of Visits

| When→<br>What ↓                                              | Month<br>-1<br>Screen | Month<br>0 | Month<br>3 | Month<br>6 | Month<br>9 | Month<br>12 | Month<br>15 | Month<br>18 | Month<br>21 | Month<br>24 | Early<br>Term<br>(ET)* |
|--------------------------------------------------------------|-----------------------|------------|------------|------------|------------|-------------|-------------|-------------|-------------|-------------|------------------------|
| Consents                                                     | x                     |            |            |            |            |             |             |             |             |             |                        |
| Screening ultrasound                                         | x                     |            |            |            |            |             |             |             |             |             |                        |
| Medical-Surgical history                                     | x                     |            |            |            |            |             |             |             |             |             |                        |
| Blood tests                                                  | x                     | x          | x          | x          | x          | x           | x           | x           | x           | x           | x                      |
| Vitals (BP, temp)                                            | x                     | x          | x          | x          | x          | x           | x           | x           | x           | x           | x                      |
| Review all medicines                                         | x                     | x          | x          | x          | x          | x           | x           | x           | x           | x           | x                      |
| Review of adverse events / side effects                      |                       | x          | x          | x          | x          | x           | x           | x           | x           | x           | x                      |
| Review your study calendar/diary/journal                     |                       | x          | x          | x          | x          | x           | x           | x           | x           | x           | x                      |
| Knee exam                                                    | x                     | x          | x          | x          | x          | x           | x           | x           | x           |             | x                      |
| MRI coil fit test                                            | x                     |            |            |            |            |             |             |             |             |             |                        |
| Questionnaires                                               | x                     | x          | x          | x          | x          | x           | x           | x           | x           | x           | x                      |
| Physical function tests                                      | x                     | x          |            | x          |            | x           |             | x           |             | x           | x                      |
| Observed Gait Analysis (optional)                            |                       | x          |            |            |            | x           |             |             |             | x           |                        |
| Knee X-rays                                                  | x                     |            |            |            |            |             |             |             |             | x           | x                      |
| Knee synovial fluid for storage                              |                       | x          | x          | x          | x          | x           | x           | x           | x           | x           | x                      |
| Blood collection (serum, plasma, and white cell) for storage |                       | x          |            |            |            | x           |             |             |             | x           | x                      |
| Urine collection for storage                                 |                       | x          |            |            |            | x           |             |             |             | x           | x                      |
| Bone density test                                            |                       | x          |            |            |            | x           |             |             |             | x           | x                      |
| Height & weight                                              | x                     | x          |            |            |            | x           |             |             |             | x           | x                      |
| Knee ultrasound                                              |                       | x          |            | x          |            | x           |             | x           |             | x           | x                      |
| Knee study injection                                         |                       | x          | x          | x          | x          | x           | x           | x           | x           |             |                        |
| MRI of study knee ‡                                          |                       | x          |            |            |            | x           |             |             |             | x           | x                      |

\*Early Termination (ET) visit is performed only if the participant withdraws from the study prior to completion.

‡ Patients volunteering to participate in Inter-Scanner Reliability Testing will undergo 2 MRIs not more than 5 days apart between the Screening and Month 0 visits. Patients volunteering to participate in MRI Assessment of Smallest Detectable Differences will undergo 2 MRIs, not more than 5 days apart, at Boston University CBI both between the Screening and Month 0 visits and at Month 24.

## Appendix C - ACR Criteria

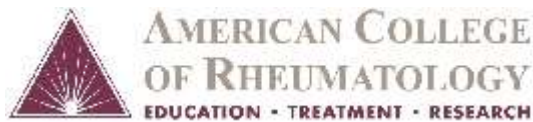

### [1986] Criteria for Classification of Idiopathic Osteoarthritis (OA) of the Knee\*.

#### Clinical and laboratory

- Knee pain  
+ at least 5 of 9:  
- Age > 50 years  
- Stiffness < 30 minutes  
- Crepitus  
- Bony Tenderness  
- Bony enlargement  
- No palpable warmth  
- ESR <40 mm/hour  
- RF <1:40  
- SF OA

92% sensitive  
75% specific

#### Clinical and radiographic

- Knee pain  
+ at least 1 of 3:  
- Age > 50 years  
- Stiffness < 30 minutes  
- Crepitus + Osteophytes

91% sensitive  
86% specific

#### Clinical†

- Knee pain  
+ at least 3 of 6:  
- Age > 50 years  
- Stiffness < 30 minutes  
- Crepitus  
- Bony Tenderness  
- Bony enlargement  
- No palpable warmth

95% sensitive  
69% specific

---

\* ESR = erythrocyte sedimentation rate (Westergren); RF = rheumatoid factor; SF OA = synovial fluid signs of OA (clear, viscous, or white blood cell count <2,000/mm<sup>3</sup>).

† Alternative for the clinical category would be 4 of 6, which is 84% sensitive and 89% specific.

*R. Altman, E. Asch, D. Bloch, G. Bole, D. Borenstein, K. Brandt, et al. The American College of Rheumatology criteria for the classification and reporting of osteoarthritis of the knee. Arthritis Rheum 1986;29:1039--1049.*

©2004 American College of Rheumatology

## *Appendix D - K/L Grading System*

### Kellgren and Lawrence Radiographic Grading System for Osteoarthritis

| <u>Grade</u> | <u>Classification</u> | <u>Description</u>                                              |
|--------------|-----------------------|-----------------------------------------------------------------|
| 0            | Normal                | No features of OA                                               |
| 1            | Doubtful              | Minute osteophyte, doubtful significance                        |
| 2            | Minimal               | Definite osteophyte, unimpaired joint space                     |
| 3            | Moderate              | Moderate diminution of joint space                              |
| 4            | Severe                | Joint space greatly impaired with sclerosis of subchondral bone |

## *Appendix E - Questionnaires*

### *WOMAC® LK3.1 Questionnaire*

The Western Ontario and McMaster Universities OA Index (WOMAC® LK3.1), is a tri-dimensional, self administered, patient-centered health status questionnaire. Its item inventory has been designated to capture the essential elements of pain, stiffness, and physical disability in patients with OA of the knee and/or hip joints. It contains twenty-four items (5 pain, 2 stiffness, and 17 physical function) and takes approximately ten minutes for the participant to complete.

The WOMAC® LK3.1 Index has been subject to more than 30 studies examining its basic clinimetric properties and has been translated into over 70 different language forms. Its ability to detect change in health status has been demonstrated following patient exposure to a variety of different interventions - NSAIDs, COX-2 Inhibitors, Analgesics, Viscosupplements, Physiotherapy and Orthopaedic surgery - making WOMAC® LK3.1 a standard instrument utilized in clinical studies.

WOMAC® LK3.1 scoring will be done according to User Guide IX (©2009) instructions, for which the study has an established User Agreement in place. Based on conversations pertaining to the potential for change in the WOMAC® LK3.1 in the interim between the Screening and Month 0 visits, we will use the Screening WOMAC® LK3.1 score as the baseline score for statistical analysis purposes.

### *SF-36v2™*

The SF-36 is a multi-purpose, short-form health survey consisting of 36 questions. It yields an 8-scale profile of functional health and well-being scores as well as psychometrically-based physical and mental health summary measures and a preference-based health utility index. It is a generic measure, as opposed to one that targets a specific age, disease, or treatment group. Accordingly, the SF-36 has proven useful in surveys of general and specific populations, comparing the relative burden of diseases, and in differentiating the health benefits produced by a wide range of different treatments.

### *PROMIS Health Assessment Questionnaire*

The PROMIS Health Assessment Questionnaire (HAQ) is a well-validated and widely used instrument that originated from work on rheumatic disease populations and collects data on domains of disability, pain, adverse treatment effects and healthcare costs[196]. The elements that we will utilize for this study include the HAQ *Disability Index*, which assesses a patient's level of functional ability, as well as questions about drug toxicity, and medical cost data both direct (e.g. physician visits, medications) and indirect (e.g. loss of productivity).

### *Global Knee Pain Severity Scale (VAS Global Assessment)*

Knee pain severity (not activity-specific) during the past 30 days is assessed using a 0-10 numerical rating scale. The validity of numerical rating scales has been well documented, they are easy to administer and score, and can be used with a greater variety of participants than can a visual analog scale. Numeric rating scales can also be administered over the telephone to participants who become unable to visit the clinic.



## *Alignment Questionnaire*

To assess history of malalignment during young adult years, each participant will complete at their convenience, one survey with visual depictions of various knee alignments that has been previously validated. [197, 198]The participants will be asked both about their current alignment as well as their recalled alignment during their 20s.

Appendix F - BU/CBI MRI Screening Form

BU Imaging Center, Boston University Medical School; version 1/15/2004

Subject Name: \_\_\_\_\_

|                                                                               |
|-------------------------------------------------------------------------------|
| For staff only:<br>Session #: _____ IRB #: _____<br>Operator name and # _____ |
|-------------------------------------------------------------------------------|

**BU Safety Screening Form**

1. Do you have a problem with claustrophobia (fear of closed spaces?)  
No \_\_\_\_\_ A little \_\_\_\_\_ Pretty much \_\_\_\_\_ Severe \_\_\_\_\_
2. Do you have a heart pacemaker or defibrillator or other implanted devices? If yes, describe.  
No \_\_\_\_\_ Yes \_\_\_\_\_
3. Have you ever had an operation? If yes, Investigator to fill out Page 2.  
No \_\_\_\_\_ Yes \_\_\_\_\_
4. Have you ever been injured by metallic foreign body which was not removed?  
No \_\_\_\_\_ Yes \_\_\_\_\_
5. Do you wear braces on your teeth, or do you have false teeth or removable bridgework? Do you have any unremovable body piercings?  
No \_\_\_\_\_ Yes \_\_\_\_\_
6. Do you have any tatoos? If yes, describe their location.  
No \_\_\_\_\_ Yes \_\_\_\_\_
7. (Females only): Is there any possibility that you are pregnant?  
No \_\_\_\_\_ Yes \_\_\_\_\_
8. Please list medications you took today or are taking regularly.  
(try to include the name of the medicine, dose, how often, and time of last dose).
9. Have you ever had any previous studies (MRI, CT or other)? If yes circle on list.  
No \_\_\_\_\_ Yes \_\_\_\_\_
10. Do you have a breathing disorder or movement disorder? If yes describe.  
No \_\_\_\_\_ Yes \_\_\_\_\_
11. Weight: (lbs) \_\_\_\_\_ Birthdate: \_\_\_\_/\_\_\_\_/\_\_\_\_

\_\_\_\_\_  
Signature of Person Completing Page 1

Date:        /        /

**Investigator to complete if Item #3 on Page 1 is Yes.**

Some of the following items may be hazardous to your safety and some can interfere with the MRI examination. Please check the correct answer for each of the following. Do you have any of the following:

- Yes  No Cardiac pacemaker
- Yes  No Implanted cardiac defibrillator
- Yes  No Aneurysm clip(s)
- Yes  No Carotid artery vascular clamp
- Yes  No Neurostimulator
- Yes  No Insulin or infusion pump
- Yes  No Implanted drug infusion device
- Yes  No Bone growth/fusion stimulator
- Yes  No Cochlear, otologic, or ear implant
- Yes  No Any type of prosthesis (eye, penile, etc.)
- Yes  No Heart valve prosthesis
- Yes  No Artificial limb or joint
- Yes  No Electrodes (on body, head, or brain)
- Yes  No Intravascular stents, filters, or coils
- Yes  No Shunt (spinal or intraventricular)
- Yes  No Vascular access port and/or catheter
- Yes  No Swan-Ganz catheter
- Yes  No Any implant held in place by a magnet
- Yes  No Transdermal delivery system (Nitro)
- Yes  No IUD or diaphragm
- Yes  No Tattooed makeup (eyeliner, lips, etc)
- Yes  No Body piercing(s)
- Yes  No Any metal fragments
- Yes  No Internal pacing wires
- Yes  No Aortic clip
- Yes  No Metal or wire mesh implants
- Yes  No Wire sutures or surgical staples
- Yes  No Harrington rods (spine)
- Yes  No Metal rods in bones
- Yes  No Joint replacement \_\_\_\_\_
- Yes  No Bone/joint pin, screw, nail, wire, plate
- Yes  No Hearing aid (**Remove before MRI**)
- Yes  No Dentures (**Remove before MRI**)

**NOTE: YOU ARE REQUIRED TO WEAR EARPLUGS OR EARPHONES DURING THE MRI EXAMINATION.**

-----  
Signature of Investigator Completing Page 2

Date: / /

Appendix G - Tufts MRI Screening Form

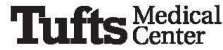

Department of Radiology

MRI OUTPATIENT SCREENING  
PATIENT INFORMATION

2-Hole 1/4 2 3/4 - 3-Hole 1/4 4 1/4

- 1) Patient Name: \_\_\_\_\_ Hospital #: \_\_\_\_\_
- 2) Has placement of an intravenous line been difficult in the past?  Yes  No If yes, describe: \_\_\_\_\_
- 3) Do you have an intravenous access device?  Yes  No If yes, which?  Broviac  Hickman  Infusaport
- 4) Do you have any allergies to food, medications or latex?  Yes  No If yes, list \_\_\_\_\_
- 5) Please list medications, including over the counter medications, with the doses that you currently take. \_\_\_\_\_
- 6) Please list surgical operations that you have had \_\_\_\_\_
- 7) Do you have any of the following medical problems?  
 Asthma or Shortness of breath:  Yes  No      Sickle cell anemia:  Yes  No  
 Hypertension:  Yes  No      Multiple myeloma:  Yes  No  
 Diabetes:  Yes  No      Pheochromocytoma:  Yes  No  
 Kidney failure:  Yes  No      Heart disease:  Yes  No
- 8) Have you eaten in the last four hours?  Yes  No
- 9) Are you pregnant?  Yes  No  Do not know Date of last period? \_\_\_\_\_
- 10) Patient Weight \_\_\_\_\_ lb
- 11) Have you had a prior MRI exam(s)?  Yes  No If Yes, where and date \_\_\_\_\_

**MRI: MR Safety - Please check the appropriate box if you have any of the following:**

|                                                  | YES | NO |                                     | YES | NO |
|--------------------------------------------------|-----|----|-------------------------------------|-----|----|
| Cardiac pacemaker, pacer wires                   |     |    | Renal transplant clips              |     |    |
| EKG leads                                        |     |    | Insulin pump                        |     |    |
| Transdermal medication patches                   |     |    | Transcutaneous nerve simulator      |     |    |
| Implantable Device or ICD                        |     |    | Biostimulator                       |     |    |
| Intracranial aneurysm clips                      |     |    | Cardiac arrhythmias                 |     |    |
| Vascular clips                                   |     |    | Kidney problems                     |     |    |
| History of metal in eyes or metal work, Shrapnel |     |    | Back or neck surgery                |     |    |
| Heart valve prosthesis                           |     |    | Back or neck pain                   |     |    |
| Joint or limb prosthesis                         |     |    | Numbness or tingling                |     |    |
| Joint rods, screws, pins, etc.                   |     |    | Hair Wig                            |     |    |
| Middle ear prosthesis                            |     |    | Claustrophobia                      |     |    |
| Eye/Orbital prosthesis                           |     |    | Dentures, retainers or braces       |     |    |
| Hearing Aid                                      |     |    | Metal IUD                           |     |    |
| Body Piercing <small>Date/Location</small>       |     |    | Tattoo <small>Date/Location</small> |     |    |

Have you ever had an IV injection of Gadolinium (MRI IV Contrast)?  Yes  No  
 If yes, did you experience any difficulty with it? (please explain) \_\_\_\_\_

Technologist signature completing medication reconciliation \_\_\_\_\_ Date \_\_\_\_\_

50112 (5/28/03) 4883

## *Appendix H - Lab Testing*

### **Laboratory Testing TMC Central Lab**

Hemoglobin A1c – Collect in 3 mL EDTA (lavender top).

Rheumatoid Factor – Collect in 5 mL SST (gold top).

anti-CCP – Collect in 5 mL SST (gold top).

hsCRP – Collect in 5 mL SST (gold top).

Urine Pregnancy Test – Collect in 120 mL urine collection cup.

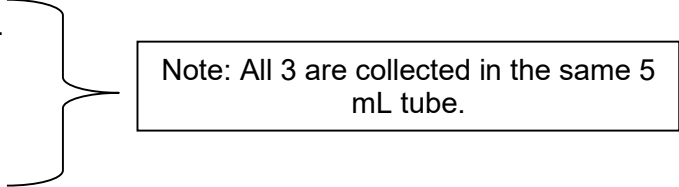

Note: All 3 are collected in the same 5 mL tube.

### **Laboratory for Storage**

Plasma – collected in 10 mL EDTA (lavender top).

Buffy Coat – collect white blood cell layer from plasma tube.

Serum – collected in 10 mL SST (tiger top).

Urine – random urine sample to store 5 mL of urine.

Synovial Fluid (knee) – any synovial fluid drained from the knee at any visit will be stored.

Appendix I - Tufts AE/UP Reporting Form

SAE and UAP Report Form

**Tufts Medical Center/Tufts University Health Sciences Institutional Review Board (IRB):  
SERIOUS ADVERSE EVENT and UNANTICIPATED PROBLEM REPORTING FORM**

**This form is to be typed and submitted to Box 817. Please complete each field and indicate "N/A" as needed; do not leave fields blank.** The form is designed to be completed in Microsoft Word with self-expanding text boxes. Please print after completion, sign and date, and submit with accompanying documentation to the IRB. When completing this form, refer to the IRB [Unanticipated Problem and Adverse Event Reporting Policy](#). When completing this form please contact the IRB Office at (617) 636-7512 with questions.

**This form is for Tufts MC/TUHS IRB reporting only.** Reporting requirements for outside agencies (for example, study sponsor, funding agency, FDA) are the responsibility of the Principal Investigator (PI).

IRB #: \_\_\_\_\_ Principal Investigator: \_\_\_\_\_  
Protocol Title: \_\_\_\_\_  
Study Subject Identification (Initials/Study ID#) \_\_\_\_\_  
Report Type (check all that apply):     Internal     External     Initial     Follow-up  
Date of Event: \_\_\_\_\_ Date of Report: \_\_\_\_\_

**Please provide a summary description of the event.** Attach additional pages, as needed, along with other supporting documentation.

**A. Serious Adverse Event (SAE).**

Nature of event (check all that apply):

- resulted in *death*
- was *life-threatening*
- resulted in *hospitalization or prolongation of existing hospitalization*
- resulted in a *persistent or significant disability/incapacitation*
- resulted in a *congenital anomaly/birth defect*
- may *jeopardize the subject's health and may require medical or surgical intervention to prevent one of the other outcomes listed above.*

Is one or more of the above 6 boxes checked? If yes, check this box; event is an **SAE**.

**B. Unanticipated Problem.**

Event (check all that apply):

- was *Unexpected*
- was *Related or Probably Related* to participation in the study

SAE and UAP Report Form

may place subject(s) or others at greater risk of harm than *previously* recognized

Are all 3 of the above boxes checked? If yes, check this box; event is an *Unanticipated Problem*

C. Status of research activities.

Please check all that apply:

- No change in research activities
- All research activities have been temporarily and voluntarily stopped for all subjects
- Partial voluntary hold on some research activities for all subjects (please detail below)
- Voluntary hold on new subject enrollment only

If event is an *Unanticipated Problem*, please describe how subject safety for continuing research activities is being ensured, and describe corrective actions already taken to ensure safety of currently enrolled subjects:

D. Study protocol and informed consent form(s) (ICF).

Please check all that apply:

Study protocol

Requires changes as a result of the event\*  Yes  No

ICF(s)

Requires changes as a result of the event\*  Yes  No

If yes, do currently enrolled subjects require notification or re-consenting as a result of the event?  Yes  No

If yes, detail when and how notification and/or re-consent will occur (*e.g.*, at next clinic appointment, immediate telephone notification to subjects):

\* All protocol and ICF revisions or other new materials (*e.g.*, a letter of subject notification) must be approved by the IRB before study enrollment can proceed, and, when indicated, subject participation in study activities may continue.

If protocol changes, ICF changes, subject notification, or subject re-consent are not required, please provide a brief justification:

Report prepared by: \_\_\_\_\_  
Please print name

Date: \_\_\_\_\_

\_\_\_\_\_  
Please sign

**SAE and UAP Report Form**

PI attestation:

I have reviewed all of the information included in this report and confirm it is accurate based on review of all available information concerning the reported event.

Principal Investigator: \_\_\_\_\_  
Please print name

Date:

\_\_\_\_\_  
Please sign

**IRB Office Review – Office use only:**

- Report reviewed; no further action required at this time.
- Report and proposed corrective actions approved; protocol and ICF changes to be reviewed separately.
- Report and proposed corrective actions reviewed; recommend further review by convened IRB.
- Report and proposed corrective actions reviewed; additional information required from PI:

\_\_\_\_\_  
Signature of Reviewer

\_\_\_\_\_  
Date

\_\_\_\_\_  
Printed name of Reviewer



*Appendix J – NHLBI JNC 7 Blood Pressure Classification Chart*

| <b>CLASSIFICATION OF BLOOD PRESSURE (BP)*</b> |                 |     |                 |
|-----------------------------------------------|-----------------|-----|-----------------|
| <b>CATEGORY</b>                               | <b>SBP mmHg</b> |     | <b>DBP mmHg</b> |
| Normal                                        | <120            | and | <80             |
| Prehypertension                               | 120–139         | or  | 80–89           |
| Hypertension, Stage 1                         | 140–159         | or  | 90–99           |
| Hypertension, Stage 2                         | ≥160            | or  | ≥100            |

\* See *Blood Pressure Measurement Techniques* (reverse side)  
 Key: SBP = systolic blood pressure DBP = diastolic blood pressure

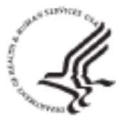

U.S. DEPARTMENT OF HEALTH AND HUMAN SERVICES  
 National Institutes of Health  
 National Heart, Lung, and Blood Institute

The Seventh Report of the Joint National Committee on Prevention, Detection, Evaluation, and Treatment of High Blood Pressure. Bethesda MD: National Heart, Lung, and Blood Institute (US) 2004.

**- Protocol: Summary of Changes –**

**Protocol Version 1 (April 12, 2010)**

- Original version (within document)

**Protocol Version 2 (June 18, 2010)**

- Clarified the amount patients will be paid per visit in ICF.
- Described in more detail serious medical conditions that would exclude subjects from study participation.
- Expanded to include that women of child-bearing potential will be required to use birth control.

**Protocol Version 3 (June 29, 2010)**

- Payment section added to the protocol
- Updated ICF to include randomization and possibility of receiving placebo in “purpose of study” section (already in later pages of ICF)
- Revised Research Authorization Form for Limited Release of Protected Health Information
- Revised study advertisements

**Protocol Version 4 (October 8, 2010)**

- Updated and expanded abbreviations and definitions in ICF
- Updated exclusion criteria

**Protocol Version 5 (February 16, 2011)**

- (New and updated) Abbreviations page in protocol
- ACR Criteria included in Eligibility Criteria
- Exclusion criterion “prior osteonecrosis” updated to specify the index knee
- Evidence of other inflammatory joint disease added to exclusion criteria
- Hemoglobin A1c to be used instead of random glucose
- Added option for local analgesia

**Protocol Version 6 (April 11, 2011)**

- Clarified inclusion criteria to include Screening WOMAC instead of Baseline WOMAC
- Added physical function testing to Screening

**Protocol Version 7 (August 3, 2011)**

- Clarified visit windows beginning at Month 3
- Added Boston University as an MRI site
- Added body composition
- Added Boston Medical Center and Tufts Medical Center MRI safety questionnaires to appendix

**Protocol Version 8 (January 25, 2012)**

- Added hyaluronic acid injection within last 6 months prior to Baseline as exclusion criterion
- Added uncontrolled HIV as exclusion criterion
- Removed language regarding data capture of subject meal times since there is no fasting blood test for this study
- Added pre-paid debit card as payment method
- Added ancillary MRI studies, per DSMB request
- Added hsCRP blood test to Months 12 and 24
- Added knee ultrasound exam to Month 24
- Clarified procedure for conducting blood pressure tests per AHA guidelines
- Added clarification of pregnancy test timing with regard to radiation exposure

**Protocol Version 9 (May 2, 2012)**

- Added knee alignment self-report questionnaire

**Protocol Version 10 (April 15, 2014)**

- Removal of Section 10: Adaptive Interim Monitoring



## **-Original statistical analysis plan-**

We will perform descriptive analyses of baseline characteristics of the treated and placebo groups to permit assessment of generalizability and success of randomization. We will use either Student t-tests or rank-based nonparametric tests whenever appropriate. Our primary analytic approach will be to use intention- to-treat (ITT) analyses with mixed effects regression models for the longitudinal repeated measures data. We will also evaluate the dropout and adherence patterns of trial subjects to see if these issues may change the assessment of treatment effect. The likelihood based mixed effects model has been shown to be less biased in the analysis of longitudinal data from clinical trials with dropouts than either deleting subjects who withdraw or imputing results using last observation carried forward<sup>7</sup>. The specific endpoints that we will test and their conceptualization as outcomes or intermediaries are presented in Table 4. In section E16 we propose use of an adaptive method for interim monitoring that will use these analyses performed on the first half of the trial subjects, and, if necessary, separately on the second half of the subjects as well.

Our analyses will evaluate the cartilage volumes and WOMAC pain scores over time using mixed effects regression models (incorporating both fixed and random effects) for longitudinal repeated measures to see if there is a difference in the trajectory of the structural and clinical outcome measures over time between the treatment groups<sup>249</sup>. The two co-primary endpoints are (i) cartilage loss (structural) and WOMAC pain (clinical). The models will include a random intercept for each subject, 3 dummy variables corresponding to the 4 randomization strata (gender and radiographic severity of KOA at entry to the trial (Kellgren and Lawrence grades 2 vs. 3)), use of analgesia (acetaminophen) at the times of outcome measurement, a time effect, an effect of treatment, and the interaction between time and treatment that will provide the basis for testing hypothesis 1 (i.e. testing if the trajectories are

different between treatment groups). The effect of time will be assumed to be linear in this model unless preliminary data analysis suggests that the cartilage volumes or WOMAC score have a distinctly non-linear trend over time. The compound symmetry variance structure will be assumed for the correlation between repeated measures over time within a subject. If the likelihood cannot be maximized for this model, then the covariance structure will be simplified by removing the random intercept. In secondary analyses we will evaluate whether the clinical conclusions drawn from this trial are sensitive to the choice of different modeling methods.

For secondary analyses, we will employ the Student-t test and the rank-based Wilcoxon test to evaluate the difference between treatment groups in the change in WOMAC scores or cartilage volume, as that is how these outcomes have often been analyzed. The LOCF approach will be used to address dropout from the trial in these analyses of change over the duration of the trial. Additional secondary analyses will use alternative regression modeling approaches, including ordinal logistic regression<sup>250</sup>, and regression tree models.

The influence of exposures that might exert intermediary or confounding effects on the outcomes (e.g. knee OA severity, serum 25(OH)D, radiographic knee alignment, use of analgesia, and BMI) will be tested by performing stratified analyses and by entering them as covariates in the linear regression models (Table 4). The ways in which all these variables might interact are complex so we will interpret our results in respect of differentiating confounding from an intermediary role on the basis of biologically based a priori hypotheses.

For interim monitoring, we will use the adaptive approach due to Bauer and Köhne<sup>6</sup>. This approach to interim monitoring is based on the use of Fisher's method of combining p-values from separate experiments<sup>252</sup> rather than repeated analyses of accruing data, such as the Peto method. Fisher's method rejects a common null hypothesis based on two independent experiments with significance of 0.05 if  $p_1 * p_2 \leq 0.0087$ , where this cutoff is based on the chi-square distribution with 4

degrees of freedom. In this case, the  $p_1$  would be the p-value for the null hypothesis of no treatment effect in the first half of the subjects, and  $p_2$  would be the same for the second half of the trial subjects. Using this relationship, Bauer and Köhne develop cutoffs for  $p_1$  would that would allow early stopping while maintaining a significance level of 0.05 for the product of the p-values. Using the values from their Table 1 we will stop the trial for success if  $p_1 \leq 0.0233$ . The trial would be stopped for futility if  $p_1 > 0.5$ . If  $p_1$  satisfies neither of these conditions, then the trial would continue, and the second half of the subjects would be analyzed separately at the end of the trial for  $p_2$ ; then the product of  $p_1$  and  $p_2$  would be compared to 0.0087. This adaptive method for interim monitoring allows us to use the mixed effects analysis as outlined in section E.15 for the primary outcome of cartilage volume; this will be performed on the first half of the trial subjects at the interim analysis, and, if the trial continues, separately on the second half of the subjects at the trial's end.

Bauer and Köhne note that the power loss due to the adaptive interim analysis is quite small when compared to the best single test on the complete data when the sub-samples are the same size, and when stopping for futility is only done when  $p_1$  is at least as large as 0.5. In this setting they found 77.8% power for trials where a single complete analysis would have 80% power. In our simulations presented in section E.17, we found a slightly larger, but manageable, loss of power due to the adaptive interim analysis. The gain from this interim analysis is from the possibility of early stopping of the trial, which would significantly reduce the number of MRIs that need to be acquired and read in the second half of the subjects, and the truncation of their treatment and follow-up. It would also allow early closing of the study and earlier dissemination of study results. In 60-70% of the simulations presented in section D.17, the studies would have been stopped early.

The interim analysis of cartilage volume (pain will not be evaluated in the interim analysis) will be conducted by the study statistician and presented to the DSMB for the trial. The DSMB will evaluate these results in light of the stopping rules above and advise whether the trial should continue or stop.

| <b>Table 4. Conceptualization of study measures</b> |                                                                                                                                           |                                                                       |                                                                                              |
|-----------------------------------------------------|-------------------------------------------------------------------------------------------------------------------------------------------|-----------------------------------------------------------------------|----------------------------------------------------------------------------------------------|
|                                                     | Structural outcome                                                                                                                        | Clinical outcome                                                      | Covariate                                                                                    |
| <b>Primary</b>                                      | Cartilage volume                                                                                                                          | WOMAC pain                                                            | Knee alignment<br>Analgesic use                                                              |
| <b>Secondary</b>                                    | BML score<br>Subchondral attrition<br>Tibial medial: lateral<br>BMD ratio<br>Tibial subchondral<br>aBVF<br>tibial BMD<br>femoral neck BMD | WOMAC function<br><br>Physical function<br><br>Healthcare utilization | Femoral neck BMD<br><br>Serum 25 (OH)D<br><br>(synovitis; US and/or<br>MRI)<br>Analgesic use |



## **-Final statistical analysis plan-**

### **Analytic plan**

Our co-primary outcomes were change in knee cartilage volume (assessed using the CDI and mean cartilage thickness) and change in pain (WOMAC pain subscale). We used intention-to-treat analyses for all outcomes. All models were adjusted by Kellgren-Lawrence score and gender; and, when appropriate, for use of rescue analgesia. We performed multiple imputation to fill in missing values for structure, symptom and function outcomes. We used mixed effects regression models with a random intercept for longitudinal repeated measures, and used repeated measures GEE analyses for use of rescue analgesia. The chi-square test was used to analyze adverse events at the person level, while negative binomial regression was used to analyze whether the total count of AEs per person differed across groups. All analyses were performed in SAS 9.4 (Cary, NC).

## **- Analysis Plan: Summary of Changes –**

- We did not perform an interim analysis. Please see letter to the DSMB for our reasoning, and their approval letter (both attached)
- Due to the null results, we did not perform the secondary analyses, including alternative modeling strategies and stratified analyses examining potential confounders
- We performed multiple imputation to estimate missing outcomes and perform the ITT analysis
- Analyses of adverse events were not specified in the initial analysis plan, and were added to the final analysis plan

Thursday, March 27, 2014

Joanne M. Jordan, MD, MPH  
Thurston Arthritis Research Center  
The University of North Carolina at Chapel Hill  
3300 Thurston Bldg., CB# 7280  
Chapel Hill, NC 27599-7280  
[joanne\\_jordan@med.unc.edu](mailto:joanne_jordan@med.unc.edu)

Dear Dr. Jordan,

I am writing in regards to a planned interim analysis of data from the ongoing clinical trial of intra-articular corticosteroids for knee OA (R01 AR057802). This plan was proposed in the resubmission of the grant in response to a critique that called for a more innovative / adaptive design. Unfortunately, with hindsight, an interim analysis with potential stopping rules seems ill-conceived and wasteful of participant effort and data. Therefore, we are requesting permission from the DSMB and NIH to amend the protocol to eliminate the interim analysis; and to take the trial to full completion.

The plan for the interim analysis, including the decision rules for stopping the study, are described mainly in Sections A.4 and E.16 of the revised grant application (and highlighted in the attached document). Briefly, the approach allows termination of the trial at the point at which the first half of participants have completed the intervention, based on a statistical indication of either efficacy or futility for the primary structural outcome, cartilage volume.

The first obstacle to this plan relates to feasibility of completing the cartilage measurements in sufficient time for its deployment. During the course of the trial we found that precise quantification of change in this measure requires both baseline and follow-up image sets to be available contemporaneously. In other words, the original expectation that we could enhance the efficiency of performing this measurement by reading the baseline MRIs prior to acquiring the follow-up images turned out to actually increase workload. Therefore, this baseline analysis has not been performed. However, the

interim analysis plan requires that we read and quality-check all MRI pairs from the first 52 completed participants. Analysis of those image sets will take between 2 to 6 months depending on whether we apply full segmentation measurement or a parsimonious approach that we have been developing.

Either way, by the time these measurements are completed, a substantially larger number of participants will have completed the study intervention, diminishing any value of premature cessation of the trial. The last injection is performed at the month 21 visit and the last MRI occurs at the month 24 visit. If it takes 2 months to complete MRI measurement on the first half of the participants, only 28 people will NOT have received their last injection. If it takes six months, only 4 participants will NOT have received their last injection. The last study injection will be given on or about September 24, 2014 and the last study MRI will occur in December, 2014. Therefore stopping the trial to avoid study drug exposure (or lack thereof) on the basis of futility or efficacy will have very minimal benefit to ongoing participants.

Another concern is that a stopping rule based only on the primary outcome risks foregoing a great deal of valuable secondary information - for example, the effects of intra-articular corticosteroids on pain and function, as well as on other important structural processes such as effusion and subchondral bone changes. In addition, statistical power (already borderline for some outcomes) will be further compromised.

Our view is that an interim analysis will not benefit the study. There would be a loss of information if the study stops early – we will get more precise estimates of the efficacy and safety of IACS if the entire study is fully completed. Also, because of the long follow-up period for the study protocol on each subject (2 years) there is little ethical or practical benefit from stopping early. All of the study subjects have already been randomized and exposed to study treatment and MRI assessments, and even the subjects who are in the *interim analysis termination group* (the second half of subjects randomized) would have almost have completed the full follow-up. Most of these subjects would only be spared from the 24-month follow-up visit, a visit that does not involve intra-articular injection and during which we obtain the final primary outcome data point. Therefore, eliminating these visits would do very little to lessen participant burden, but would have a significant impact on the primary outcome and other important data points.

If you agree, we will proceed with a protocol amendment to remove the interim analysis from the plan.

Sincerely,

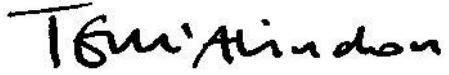A handwritten signature in black ink that reads "Tim McAlindon". The signature is written in a cursive, slightly slanted style.

Timothy McAlindon, MD, MPH  
Nathalie V. Zucker & Milton O. Zucker Professor of Rheumatology & Immunology  
Chief, Division of Rheumatology  
Tufts Medical Center

cc: Gayle Lester, Ph.D.
