# Supplementary material
Source: PubMed Central journal article supplement (PMC5815012)
Supplement: jama-317-1967-s002.pdf [file jama-317-1967-s002.pdf]

## Supplementary Online Content

McAlindon TE, LaValley MO, Harvey WF, et al. Effect of intra-articular triamcinolone vs saline on knee cartilage volume and pain in patients with knee osteoarthritis: a randomized clinical trial. *JAMA*. doi: 10.1001/jama.2017.5283

### **eTable 1.** Treatment Effect on Structural Outcomes, Completers' Analysis

This supplementary material has been provided by the authors to give readers additional information about their work.

**eTable 1. Treatment Effect on Structural Outcomes, Completers' Analysis**

| Measurement                                     | Triamcinolone (n=53)<br>Mean (95% CI) |                           | Saline (n=54)<br>Mean (95% CI) |                          | Between group mean<br>change<br>(95% CI) | p-<br>value |
|-------------------------------------------------|---------------------------------------|---------------------------|--------------------------------|--------------------------|------------------------------------------|-------------|
|                                                 | Baseline                              | 2-year Change             | Baseline                       | 2-year Change            |                                          |             |
| Mean Cartilage Thickness (mm)                   |                                       |                           |                                |                          |                                          |             |
| Index compartment mean thickness                | 2.44 (2.28, 2.60)                     | -0.15 (-0.21, -0.10)      | 2.35 (2.20, 2.51)              | -0.09 (-0.15, -0.03)     | -0.06 (-0.15, 0.02)                      | .14         |
| Total Mean Cartilage Thickness                  | 5.48 (5.23, 5.73)                     | -0.21 (-0.29, -0.13)      | 5.57 (5.33, 5.82)              | -0.13 (-0.22, -0.05)     | -0.08 (-0.19, 0.04)                      | .20         |
| Cartilage Damage Index (CDI) (mm <sup>3</sup> ) |                                       |                           |                                |                          |                                          |             |
| Index compartment CDI                           | 1006.71 (881.85, 1131.56)             | -107.78 (-145.72, -69.84) | 905.42 (781.47, 1029.37)       | -76.72 (-115.20, -38.24) | -31.06 (-85.10, 22.97)                   | .26         |
| Total CDI                                       | 2660.30 (2479.87, 2840.72)            | -143.22 (-201.57, -84.88) | 2663.95 (2484.86, 2843.05)     | -99.26 (-158.44, -40.07) | -43.97 (-127.07, 39.14)                  | .30         |
| Area of Denudation (mm <sup>2</sup> )           |                                       |                           |                                |                          |                                          |             |
| Index compartment denudation                    | 2.99 (2.22, 3.76)                     | 0.36 (0.16, 0.57)         | 3.38 (2.62, 4.15)              | 0.42 (0.21, 0.63)        | -0.06 (-0.35, 0.24)                      | .71         |
| Total Denudation                                | 4.46 (3.72, 5.21)                     | 0.11 (-0.23, 0.45)        | 4.51 (3.78, 5.25)              | 0.33 (0.00, 0.66)        | -0.22 (-0.69, 0.25)                      | .36         |
| BML (log), mm <sup>3</sup> ^                    | 7.25 (5.80, 8.71)                     | 1.74 (0.58, 2.90)         | 6.63 (5.18, 8.07)              | 1.44 (0.29, 2.60)        | 0.30 (-1.34, 1.93)                       | .72         |
| Effusion (log), mm <sup>3</sup> ^               | 10.73 (10.52, 10.95)                  | -0.13 (-0.32, 0.06)       | 10.74 (10.53, 10.96)           | -0.28 (-0.47, -0.01)     | 0.15 (-0.11, 0.42)                       | .25         |

Abbreviations used: CDI, Cartilage Damage Index.

Index compartment indicates compartment with greatest joint space narrowing.

Denudation, BML, effusion: Higher baseline values indicate worse structural damage; high change values indicate worse damage.

CDI, mean thickness: lower baseline values indicate worse structural damage, high change values indicate worse damage.

Estimates and test for treatment by time interaction from repeated-measures, random intercept model, adjusted for KL and gender.

Time used is months from baseline exam as a linear trend.

^Higher natural log values for bone marrow lesions and effusion denote greater volumes affected by these findings. The natural log transformation was used for these measures due to pronounced skewness.
